# Supplementary material for: Causal effect of smoking on DNA methylation in peripheral blood: a twin and family study
Source: Clin Epigenetics. 2018 Feb 9;10:18. doi: 10.1186/s13148-018-0452-9 (PMC5810186; doi:10.1186/s13148-018-0452-9)
Supplement: Supplementary file 1 — Table S1. This file includes Table S1: Associations for the 1882 replicated CpGs. (XLSX 156 kb) [file 13148_2018_452_MOESM1_ESM.xlsx]

## Sheet: Sheet1
Table S1 Associations for the 1882 replicated CpGs
CpG	Chromosome	Gene	Methylation level, mean (standard deviation)			P	FDR	Novel CpG reported by Joehanes et al.
			Never smokers	Former smokers	Current smokers
cg05575921	5	AHRR	0.82 (0.04)	0.79 (0.05)	0.69 (0.08)	2.69e-41	5.0225e-37	No
cg21566642	2		0.51 (0.05)	0.47 (0.07)	0.39 (0.06)	1.23e-35	1.14827e-31	No
cg05951221	2		0.48 (0.05)	0.44 (0.06)	0.38 (0.06)	1.01e-28	6.2859e-25	No
cg01940273	2		0.69 (0.04)	0.66 (0.05)	0.6 (0.05)	1.03e-25	4.80778e-22	No
cg03636183	19	F2RL3	0.72 (0.04)	0.7 (0.05)	0.64 (0.06)	2.86e-22	1.06798e-18	No
cg06126421	6		0.79 (0.05)	0.76 (0.06)	0.72 (0.06)	1.22e-17	3.79644e-14	No
cg26703534	5	AHRR	0.68 (0.03)	0.69 (0.03)	0.64 (0.03)	4.44089e-16	1.18451e-12	No
cg21161138	5	AHRR	0.77 (0.03)	0.76 (0.04)	0.72 (0.05)	1.21014e-14	2.82432e-11	No
cg11660018	11	PRSS23	0.59 (0.04)	0.57 (0.04)	0.54 (0.04)	8.59379e-12	1.78283e-08	No
cg09935388	1	GFI1	0.82 (0.05)	0.81 (0.05)	0.75 (0.07)	5.90342e-11	1.10223e-07	No
cg25648203	5	AHRR	0.84 (0.02)	0.83 (0.02)	0.81 (0.03)	1.63219e-10	2.77042e-07	No
cg19859270	3	GPR15	0.93 (0.01)	0.93 (0.01)	0.92 (0.01)	2.76954e-10	4.30917e-07	No
cg03329539	2		0.47 (0.05)	0.46 (0.05)	0.42 (0.04)	5.04103e-10	7.24008e-07	No
cg24859433	6		0.88 (0.02)	0.88 (0.02)	0.86 (0.02)	6.01999e-10	7.81941e-07	No
cg14753356	6		0.47 (0.06)	0.45 (0.06)	0.43 (0.05)	6.28199e-10	7.81941e-07	No
cg07339236	20	ATP9A	0.17 (0.04)	0.16 (0.04)	0.13 (0.03)	3.6806e-09	4.29503e-06	No
cg04885881	1		0.48 (0.05)	0.47 (0.05)	0.44 (0.05)	4.45778e-09	4.89596e-06	No
cg06644428	2		0.15 (0.05)	0.12 (0.05)	0.12 (0.05)	6.0999e-09	6.32729e-06	No
cg23916896	5	AHRR	0.29 (0.07)	0.27 (0.06)	0.23 (0.06)	1.00583e-08	9.88413e-06	No
cg14817490	5	AHRR	0.3 (0.04)	0.3 (0.04)	0.26 (0.04)	1.37325e-08	1.28199e-05	No
cg11902777	5	AHRR	0.08 (0.02)	0.08 (0.02)	0.06 (0.02)	4.01216e-08	3.52853e-05	No
cg21611682	11	LRP5	0.61 (0.03)	0.6 (0.03)	0.58 (0.03)	4.15766e-08	3.52853e-05	No
cg01692968	9		0.41 (0.05)	0.39 (0.05)	0.38 (0.05)	5.57197e-08	4.52323e-05	No
cg08709672	1	AVPR1B	0.6 (0.03)	0.59 (0.03)	0.57 (0.03)	6.54308e-08	5.09024e-05	No
cg07826859	7	MYO1G	0.66 (0.04)	0.65 (0.04)	0.63 (0.03)	1.14298e-07	8.53624e-05	No
cg25189904	1	GNG12	0.53 (0.06)	0.51 (0.07)	0.47 (0.07)	1.36034e-07	9.76878e-05	No
cg17287155	5	AHRR	0.86 (0.03)	0.85 (0.03)	0.84 (0.03)	2.19082e-07	0.000151499	No
cg06226150	20	SLC2A4RG;LIME1	0.28 (0.03)	0.28 (0.02)	0.26 (0.02)	2.85234e-07	0.0001902	Yes
cg23161492	15	ANPEP	0.3 (0.05)	0.29 (0.05)	0.26 (0.05)	6.19176e-07	0.000398643	No
cg09022230	7	TNRC18	0.76 (0.04)	0.75 (0.04)	0.73 (0.04)	6.56575e-07	0.000408631	No
cg19572487	17	RARA	0.63 (0.05)	0.61 (0.05)	0.6 (0.06)	7.53743e-07	0.000453972	No
cg03991871	5	AHRR	0.89 (0.03)	0.89 (0.03)	0.86 (0.04)	9.13447e-07	0.000532968	No
cg14580211	5	C5orf62	0.76 (0.04)	0.75 (0.04)	0.73 (0.04)	1.11585e-06	0.000631337	No
cg15187398	19	MOBKL2A	0.53 (0.05)	0.51 (0.05)	0.49 (0.04)	1.24746e-06	0.000685041	No
cg10750182	10	C10orf105;CDH23	0.62 (0.03)	0.62 (0.03)	0.6 (0.03)	2.02802e-06	0.00108186	No
cg25949550	7	CNTNAP2	0.13 (0.02)	0.13 (0.02)	0.12 (0.02)	2.63618e-06	0.00136722	No
cg05284742	14	ITPK1	0.78 (0.03)	0.77 (0.03)	0.76 (0.04)	2.75828e-06	0.00139189	No
cg23931381	19	ARRDC2	0.89 (0.02)	0.88 (0.02)	0.87 (0.02)	2.9775e-06	0.00146297	No
cg23576855	5	AHRR	0.7 (0.15)	0.69 (0.15)	0.56 (0.16)	3.48672e-06	0.00166925	No
cg26271591	2	NFE2L2	0.46 (0.06)	0.45 (0.06)	0.41 (0.06)	4.40381e-06	0.00198765	No
cg03646329	13	LPAR6;RB1	0.82 (0.04)	0.81 (0.05)	0.79 (0.05)	4.46744e-06	0.00198765	No
cg21733098	12		0.76 (0.06)	0.75 (0.07)	0.72 (0.06)	4.47117e-06	0.00198765	Yes
cg04039799	11	NAV2	0.41 (0.04)	0.4 (0.04)	0.38 (0.03)	6.25681e-06	0.00271677	No
cg01272202	5	MCC	0.83 (0.02)	0.82 (0.02)	0.81 (0.03)	6.72264e-06	0.00285269	No
cg09578155	11	LRP5	0.45 (0.03)	0.44 (0.03)	0.43 (0.03)	7.45864e-06	0.00309467	No
cg23771366	11	PRSS23	0.49 (0.04)	0.48 (0.05)	0.46 (0.04)	7.85752e-06	0.0031893	No
cg08266095	5		0.66 (0.05)	0.65 (0.05)	0.62 (0.05)	8.1846e-06	0.00325138	Yes
cg15159987	19	CPAMD8	0.7 (0.04)	0.7 (0.04)	0.68 (0.03)	8.6885e-06	0.00337964	No
cg09099830	16	ITGAL	0.58 (0.04)	0.58 (0.04)	0.56 (0.04)	1.03536e-05	0.00394513	No
cg07986378	12	ETV6	0.72 (0.05)	0.72 (0.05)	0.69 (0.04)	1.4411e-05	0.00538135	No
cg03604011	5	AHRR	0.11 (0.04)	0.12 (0.04)	0.14 (0.05)	1.56662e-05	0.00573536	No
cg14624207	11	LRP5	0.59 (0.03)	0.59 (0.04)	0.57 (0.04)	1.69243e-05	0.00607679	No
cg11588197	11	ETS1	0.32 (0.06)	0.31 (0.06)	0.28 (0.05)	1.88397e-05	0.00663689	No
cg12876356	1	GFI1	0.82 (0.05)	0.82 (0.05)	0.78 (0.06)	2.15286e-05	0.0074437	No
cg25636159	22	ADSL	0.84 (0.03)	0.83 (0.03)	0.82 (0.03)	2.29712e-05	0.00779811	No
cg27241845	2		0.72 (0.04)	0.71 (0.04)	0.69 (0.04)	2.45454e-05	0.00818369	No
cg15342087	6		0.87 (0.02)	0.87 (0.02)	0.86 (0.02)	2.53996e-05	0.00831992	No
cg08472795	2	HS6ST1	0.76 (0.03)	0.75 (0.04)	0.74 (0.03)	2.64595e-05	0.00851767	Yes
cg02583484	12	HNRNPA1;HNRPA1L-2	0.32 (0.03)	0.31 (0.03)	0.3 (0.03)	2.76417e-05	0.00874742	No
cg17087741	2		0.86 (0.04)	0.85 (0.04)	0.83 (0.05)	2.87143e-05	0.00893543	No
cg12803068	7	MYO1G	0.8 (0.07)	0.8 (0.07)	0.85 (0.07)	3.17213e-05	0.00970933	No
cg00501876	3	CSRNP1	0.65 (0.03)	0.65 (0.03)	0.63 (0.03)	3.32073e-05	0.00986315	No
cg04583842	16	BANP	0.43 (0.04)	0.43 (0.04)	0.46 (0.04)	3.32804e-05	0.00986315	Yes
cg26963277	11	KCNQ1OT1;KCNQ1	0.9 (0.02)	0.9 (0.02)	0.89 (0.02)	3.43836e-05	0.0100309	No
cg18316974	1	GFI1	0.94 (0.03)	0.94 (0.03)	0.91 (0.04)	3.57536e-05	0.0102701	No
cg22770911	10	GATA3	0.55 (0.03)	0.54 (0.03)	0.53 (0.03)	3.63982e-05	0.0102968	No
cg03450842	10	ZMIZ1	0.62 (0.03)	0.62 (0.03)	0.6 (0.03)	4.1603e-05	0.0115936	No
cg00463367	10	GATA3	0.26 (0.03)	0.26 (0.03)	0.23 (0.02)	4.70026e-05	0.0129057	No
cg18660898	1	CDC42SE1;MLLT11	0.13 (0.02)	0.13 (0.02)	0.12 (0.02)	4.97687e-05	0.0134671	No
cg08884752	1	SKI	0.75 (0.04)	0.75 (0.04)	0.73 (0.04)	5.1139e-05	0.0135177	No
cg08035323	2		0.33 (0.04)	0.33 (0.04)	0.36 (0.03)	5.14038e-05	0.0135177	No
cg12806681	5	AHRR	0.93 (0.02)	0.93 (0.02)	0.92 (0.02)	5.8947e-05	0.015159	No
cg16391678	16	ITGAL	0.72 (0.04)	0.72 (0.04)	0.7 (0.03)	5.92688e-05	0.015159	No
cg20303561	14	CCDC88C	0.74 (0.04)	0.74 (0.04)	0.72 (0.04)	6.05506e-05	0.0152776	No
cg13039251	5	PDZD2	0.81 (0.04)	0.81 (0.04)	0.84 (0.04)	6.46046e-05	0.0158757	No
cg23913963	1	RCC2	0.82 (0.03)	0.81 (0.04)	0.8 (0.04)	6.46219e-05	0.0158757	Yes
cg04460609	4	LDB2	0.46 (0.04)	0.45 (0.04)	0.43 (0.05)	7.60597e-05	0.0182588	No
cg01731783	14	C14orf43	0.66 (0.03)	0.66 (0.03)	0.65 (0.03)	7.62779e-05	0.0182588	No
cg22132788	7	MYO1G	0.88 (0.05)	0.87 (0.05)	0.91 (0.05)	8.54457e-05	0.0201944	No
cg10180092	3	TNIK	0.52 (0.06)	0.51 (0.06)	0.48 (0.05)	8.68181e-05	0.0202622	No
cg16809457	6	MDN1	0.64 (0.05)	0.64 (0.04)	0.66 (0.04)	9.92612e-05	0.0228803	Yes
cg01901332	11	ARRB1	0.72 (0.04)	0.71 (0.04)	0.69 (0.04)	0.00010525	0.023965	No
cg26728709	4	ARSJ	0.18 (0.04)	0.18 (0.05)	0.21 (0.04)	0.000110695	0.0249011	Yes
cg02451831	7	KIAA0087	0.78 (0.03)	0.78 (0.03)	0.76 (0.03)	0.000115946	0.0256942	No
cg11207515	7	CNTNAP2	0.41 (0.06)	0.41 (0.07)	0.45 (0.05)	0.000116973	0.0256942	No
cg18146737	1	GFI1	0.93 (0.05)	0.93 (0.04)	0.9 (0.06)	0.000121047	0.0262798	No
cg07902156	5	LPCAT1	0.4 (0.06)	0.39 (0.07)	0.36 (0.05)	0.000135575	0.0290312	No
cg14316231	8	MYST3	0.5 (0.03)	0.49 (0.03)	0.48 (0.03)	0.00013683	0.0290312	No
cg17372758	10	ASCC1;C10orf104	0.85 (0.02)	0.84 (0.03)	0.83 (0.02)	0.000142728	0.0299423	No
cg14179389	1	GFI1	0.21 (0.05)	0.2 (0.05)	0.18 (0.05)	0.000144566	0.029991	No
cg02370022	11		0.45 (0.07)	0.43 (0.07)	0.48 (0.08)	0.000148235	0.0301226	Yes
cg01724917	16	XYLT1	0.91 (0.02)	0.9 (0.02)	0.89 (0.02)	0.000148427	0.0301226	No
cg27312979	10	SORBS1	0.52 (0.07)	0.51 (0.07)	0.55 (0.06)	0.000153454	0.0304977	No
cg10374813	17	MED24;SNORD124	0.6 (0.04)	0.61 (0.04)	0.59 (0.04)	0.000153542	0.0304977	Yes
cg22851561	14	C14orf43	0.63 (0.04)	0.62 (0.04)	0.6 (0.04)	0.000166566	0.0327363	No
cg19719391	4		0.61 (0.03)	0.61 (0.03)	0.63 (0.03)	0.000172862	0.0333664	No
cg00324097	17	2009-09-01	0.5 (0.04)	0.51 (0.04)	0.49 (0.04)	0.000174725	0.0333664	No
cg16116321	2	FAM124B	0.59 (0.04)	0.59 (0.04)	0.57 (0.05)	0.000175424	0.0333664	Yes
cg12513616	5		0.47 (0.03)	0.46 (0.03)	0.45 (0.04)	0.00017692	0.0333664	No
cg04492228	10	GATA3	0.3 (0.04)	0.29 (0.04)	0.28 (0.04)	0.000182399	0.0340201	No
cg12075928	8	PTK2	0.62 (0.05)	0.61 (0.06)	0.59 (0.07)	0.000184031	0.0340201	No
cg19827511	14	ITPK1	0.85 (0.02)	0.84 (0.02)	0.85 (0.02)	0.000191194	0.0348338	No
cg16969872	13	RBM26	0.73 (0.04)	0.73 (0.04)	0.7 (0.03)	0.000192163	0.0348338	No
cg14675361	13	LMO7	0.26 (0.06)	0.25 (0.06)	0.28 (0.06)	0.000194498	0.0349179	Yes
cg13456470	9	PTCH1	0.5 (0.06)	0.51 (0.06)	0.53 (0.05)	0.000210764	0.0366325	Yes
cg08595501	5	IQGAP2	0.76 (0.04)	0.76 (0.04)	0.73 (0.04)	0.0002116	0.0366325	Yes
cg11071448	1	SYT2	0.58 (0.05)	0.57 (0.05)	0.55 (0.05)	0.000212769	0.0366325	No
cg26467528	6	BAT4;CSNK2B	0.62 (0.04)	0.61 (0.04)	0.59 (0.04)	0.000212792	0.0366325	Yes
cg18804920	7	CNTNAP2	0.79 (0.04)	0.8 (0.04)	0.81 (0.04)	0.000213858	0.0366325	No
cg26361535	8	ZC3H3	0.76 (0.04)	0.75 (0.04)	0.73 (0.05)	0.000223655	0.0378032	No
cg03274391	3		0.65 (0.11)	0.66 (0.1)	0.72 (0.1)	0.000224969	0.0378032	No
cg15554421	3	C3orf26;FILIP1L	0.17 (0.05)	0.16 (0.04)	0.15 (0.04)	0.000227441	0.0378032	Yes
cg02532700	22	NCF4	0.25 (0.05)	0.25 (0.05)	0.22 (0.04)	0.000228791	0.0378032	No
cg00310412	15	SEMA7A	0.55 (0.03)	0.54 (0.03)	0.53 (0.03)	0.000244211	0.039997	No
cg09322513	16	LOC283867	0.35 (0.04)	0.36 (0.04)	0.38 (0.04)	0.000247831	0.040237	Yes
cg11399508	21	DSCR9	0.07 (0.02)	0.07 (0.02)	0.08 (0.02)	0.000255896	0.0411882	Yes
cg16047567	1	DHRS3	0.35 (0.04)	0.34 (0.04)	0.33 (0.04)	0.000262288	0.0418562	No
cg10420527	11	LRP5	0.55 (0.03)	0.54 (0.03)	0.53 (0.03)	0.000269883	0.0427033	No
cg23831876	2	SLC1A4	0.88 (0.02)	0.87 (0.02)	0.87 (0.02)	0.000280733	0.0439509	No
cg02968508	3	IL17RE	0.81 (0.03)	0.8 (0.02)	0.79 (0.03)	0.000286656	0.0439509	Yes
cg05156137	21	RCAN1	0.29 (0.05)	0.29 (0.05)	0.32 (0.05)	0.000287221	0.0439509	Yes
cg01899089	5	AHRR	0.54 (0.03)	0.53 (0.04)	0.52 (0.04)	0.000288958	0.0439509	No
cg16332927	6	C6orf129	0.92 (0.02)	0.92 (0.02)	0.91 (0.02)	0.000290664	0.0439509	Yes
cg07484739	2		0.67 (0.05)	0.67 (0.05)	0.65 (0.04)	0.000291892	0.0439509	Yes
cg10531355	5	SERINC5	0.5 (0.06)	0.49 (0.06)	0.46 (0.04)	0.000296352	0.0442655	No
cg02586730	11	EFEMP2	0.7 (0.03)	0.69 (0.03)	0.69 (0.03)	0.000307208	0.0455229	Yes
cg20059012	12	RARG	0.24 (0.08)	0.23 (0.08)	0.19 (0.07)	0.00031522	0.0463423	No
cg23638849	11	SHANK2	0.8 (0.03)	0.8 (0.03)	0.82 (0.03)	0.000331488	0.0483533	Yes
cg09837977	7	LRRN3;IMMP2L	0.89 (0.02)	0.88 (0.02)	0.88 (0.02)	0.00033616	0.0486545	No
cg13500388	16	CBFB	0.59 (0.03)	0.58 (0.03)	0.57 (0.04)	0.000346284	0.0496423	No
cg08772028	11	AMICA1	0.53 (0.05)	0.52 (0.05)	0.51 (0.05)	0.000349642	0.0496423	No
cg04019522	2	BIN1	0.62 (0.04)	0.62 (0.04)	0.64 (0.04)	0.000352027	0.0496423	No
cg11735008	1	HIVEP3	0.71 (0.06)	0.69 (0.06)	0.73 (0.06)	0.000353619	0.0496423	No
cg22040631	2		0.77 (0.04)	0.77 (0.04)	0.75 (0.04)	0.000361036	0.0503052	Yes
cg04956244	17	RARA	0.63 (0.03)	0.63 (0.03)	0.64 (0.03)	0.000382648	0.0529216	No
cg00295485	2	UXS1	0.6 (0.05)	0.59 (0.05)	0.57 (0.04)	0.000390011	0.0535434	No
cg21322436	7	CNTNAP2	0.25 (0.03)	0.24 (0.03)	0.24 (0.03)	0.000394365	0.0536609	No
cg06320277	2	FHL2	0.18 (0.03)	0.18 (0.03)	0.19 (0.03)	0.000396615	0.0536609	Yes
cg04359840	16	XYLT1	0.65 (0.05)	0.64 (0.05)	0.62 (0.05)	0.000414968	0.05574	No
cg00808969	11	USP35;KCTD21	0.36 (0.03)	0.35 (0.03)	0.35 (0.03)	0.000427491	0.0563312	Yes
cg00659129	8	ASAP1	0.88 (0.02)	0.87 (0.02)	0.89 (0.02)	0.000427633	0.0563312	Yes
cg08621445	6		0.68 (0.05)	0.67 (0.05)	0.65 (0.05)	0.00042842	0.0563312	Yes
cg05694621	1	PDE4B	0.39 (0.06)	0.38 (0.06)	0.41 (0.05)	0.000431591	0.0563513	Yes
cg14712058	19	SIN3B	0.79 (0.03)	0.79 (0.03)	0.78 (0.03)	0.000443044	0.0571424	No
cg08577727	19	MRI1	0.75 (0.03)	0.74 (0.03)	0.73 (0.03)	0.000445907	0.0571424	Yes
cg26077378	3	ZNF385D	0.18 (0.06)	0.16 (0.05)	0.15 (0.05)	0.000447764	0.0571424	No
cg03547355	1		0.62 (0.03)	0.61 (0.03)	0.61 (0.03)	0.000449892	0.0571424	No
cg00687135	3	ZNF385D	0.48 (0.06)	0.46 (0.06)	0.45 (0.05)	0.000457659	0.0573959	No
cg25317941	2	ECEL1	0.36 (0.02)	0.37 (0.02)	0.37 (0.02)	0.000458036	0.0573959	Yes
cg04535902	1	GFI1	0.92 (0.03)	0.92 (0.03)	0.9 (0.03)	0.000464511	0.0578192	No
cg14435720	9	EGFL7;MIR126	0.94 (0.03)	0.94 (0.03)	0.92 (0.04)	0.000478436	0.0591581	No
cg00723017	8	FER1L6	0.62 (0.03)	0.62 (0.03)	0.64 (0.03)	0.000495939	0.0609189	Yes
cg09197783	11	SLC43A3	0.77 (0.03)	0.76 (0.03)	0.75 (0.02)	0.000501599	0.0612115	No
cg25508605	15	SLCO3A1	0.94 (0.03)	0.94 (0.02)	0.95 (0.02)	0.000539347	0.0653906	Yes
cg20596640	13	ZMYM5	0.25 (0.05)	0.25 (0.05)	0.23 (0.03)	0.000543501	0.0654691	Yes
cg07151117	8	DUSP4	0.18 (0.03)	0.17 (0.03)	0.16 (0.03)	0.000555103	0.066438	No
cg09662411	1	GFI1	0.76 (0.04)	0.76 (0.04)	0.74 (0.03)	0.000567841	0.0675297	No
cg06819357	14	TECPR2	0.64 (0.04)	0.64 (0.04)	0.66 (0.03)	0.000597008	0.070549	No
cg14977938	14	ZFYVE21	0.74 (0.04)	0.74 (0.04)	0.76 (0.03)	0.000607086	0.0712886	No
cg19142553	7	HNRNPA2B1	0.65 (0.04)	0.65 (0.04)	0.64 (0.03)	0.000625851	0.0730329	No
cg06974428	10	PIP4K2A	0.57 (0.05)	0.57 (0.04)	0.55 (0.05)	0.000637707	0.0739542	No
cg24049493	1	HIVEP3	0.25 (0.08)	0.23 (0.07)	0.27 (0.07)	0.000662918	0.0763179	No
cg20124610	13	CARS2	0.56 (0.03)	0.56 (0.03)	0.54 (0.03)	0.000666823	0.0763179	No
cg16611234	11		0.36 (0.05)	0.35 (0.05)	0.33 (0.06)	0.000670352	0.0763179	No
cg07123182	11	KCNQ1OT1;KCNQ1	0.95 (0.02)	0.95 (0.02)	0.94 (0.02)	0.000684159	0.0774178	No
cg10001987	17	ZBTB4	0.79 (0.06)	0.77 (0.06)	0.77 (0.06)	0.000701764	0.0789315	Yes
cg21913886	1	TMEM51	0.88 (0.03)	0.88 (0.02)	0.87 (0.03)	0.000721525	0.0802025	No
cg05635617	3	RBM6	0.11 (0.02)	0.11 (0.02)	0.12 (0.02)	0.000721655	0.0802025	Yes
cg01257799	11	CXCR5	0.17 (0.03)	0.16 (0.03)	0.15 (0.03)	0.000730181	0.0806699	No
cg05157251	18	PMAIP1	0.15 (0.04)	0.14 (0.04)	0.13 (0.03)	0.000743877	0.0816995	No
cg13668129	19	HNRNPUL1	0.24 (0.02)	0.23 (0.02)	0.23 (0.02)	0.000765525	0.083229	No
cg24090911	5	AHRR	0.81 (0.03)	0.81 (0.03)	0.79 (0.03)	0.000766718	0.083229	No
cg03415545	4	ADH1C	0.77 (0.04)	0.77 (0.04)	0.75 (0.03)	0.000772943	0.0834198	Yes
cg01435643	13	MCF2L	0.45 (0.06)	0.45 (0.07)	0.48 (0.06)	0.000777488	0.0834231	No
cg23480021	3		0.75 (0.1)	0.77 (0.09)	0.81 (0.09)	0.00078191	0.0834231	No
cg12623364	4	LEF1	0.24 (0.03)	0.24 (0.03)	0.23 (0.03)	0.000793057	0.0841317	No
cg23973524	19	CRTC1	0.64 (0.05)	0.64 (0.04)	0.67 (0.05)	0.000813544	0.0858174	No
cg27464065	12	APOLD1	0.79 (0.03)	0.78 (0.03)	0.78 (0.03)	0.000821608	0.0861748	Yes
cg00835193	19	LINGO3	0.89 (0.02)	0.89 (0.02)	0.87 (0.03)	0.000826163	0.0861748	No
cg06901890	9	FNBP1	0.21 (0.03)	0.2 (0.03)	0.19 (0.03)	0.000844196	0.0875666	No
cg20698421	2	SLC1A4	0.47 (0.07)	0.45 (0.07)	0.43 (0.06)	0.000851539	0.0878402	No
cg07925311	16	KIFC3	0.84 (0.02)	0.84 (0.02)	0.84 (0.02)	0.00086004	0.0882297	No
cg25560398	2	ECEL1P2	0.6 (0.02)	0.6 (0.02)	0.59 (0.01)	0.000868963	0.088658	No
cg14274621	2		0.16 (0.02)	0.16 (0.03)	0.15 (0.02)	0.000902244	0.0906543	Yes
cg06298346	5	ANKRD33B	0.25 (0.04)	0.24 (0.04)	0.23 (0.04)	0.000905843	0.0906543	Yes
cg26937798	16	IL4R	0.06 (0.02)	0.06 (0.02)	0.05 (0.01)	0.000912896	0.0906543	Yes
cg04551776	5	AHRR	0.81 (0.03)	0.81 (0.03)	0.8 (0.03)	0.000915069	0.0906543	No
cg20385395	5	SNHG4;SNORA74A;MATR3	0.5 (0.03)	0.49 (0.03)	0.48 (0.03)	0.000917662	0.0906543	No
cg16104139	5		0.56 (0.03)	0.56 (0.03)	0.54 (0.03)	0.000930901	0.0914782	Yes
cg17719126	6	PHF1	0.96 (0.01)	0.97 (0.01)	0.96 (0.01)	0.000939902	0.0918791	Yes
cg21487261	17		0.04 (0.01)	0.04 (0.01)	0.05 (0.01)	0.000964056	0.0937495	Yes
cg00060836	8	SNHG6	0.75 (0.03)	0.74 (0.03)	0.74 (0.03)	0.000975885	0.094408	Yes
cg16220567	6	BAT4	0.48 (0.05)	0.47 (0.05)	0.45 (0.05)	0.000984786	0.0944968	Yes
cg05644480	19	APOC1	0.54 (0.04)	0.54 (0.05)	0.52 (0.04)	0.000986925	0.0944968	Yes
cg07251887	17	LOC100130933;RECQL5	0.53 (0.04)	0.52 (0.04)	0.5 (0.03)	0.00100069	0.0949937	No
cg26819718	10	C10orf11	0.87 (0.03)	0.87 (0.03)	0.85 (0.04)	0.00100604	0.0949937	Yes
cg08166214	16		0.78 (0.04)	0.78 (0.04)	0.76 (0.05)	0.0010108	0.0949937	Yes
cg24049050	1	ARHGAP29	0.25 (0.03)	0.24 (0.03)	0.23 (0.03)	0.00101247	0.0949937	No
cg08038054	7	GNG11	0.48 (0.06)	0.48 (0.06)	0.52 (0.06)	0.00103275	0.0957664	No
cg19956914	7	SUMF2	0.6 (0.06)	0.6 (0.05)	0.62 (0.05)	0.00103474	0.0957664	No
cg10592478	12	RARG	0.9 (0.03)	0.89 (0.02)	0.89 (0.03)	0.00103609	0.0957664	No
cg07495470	22	POLDIP3	0.48 (0.04)	0.47 (0.03)	0.47 (0.03)	0.00105157	0.0967184	Yes
cg16880946	7	HOXA6	0.39 (0.04)	0.38 (0.04)	0.36 (0.04)	0.00109928	0.0996364	No
cg03281572	10	VTI1A	0.89 (0.02)	0.88 (0.02)	0.87 (0.02)	0.00110017	0.0996364	Yes
cg03047995	14	FITM1	0.31 (0.04)	0.3 (0.04)	0.33 (0.04)	0.00110153	0.0996364	Yes
cg27339256	8		0.9 (0.02)	0.9 (0.02)	0.89 (0.02)	0.00110464	0.0996364	Yes
cg10012530	2	HS6ST1	0.76 (0.02)	0.76 (0.03)	0.75 (0.03)	0.00111094	0.0997233	Yes
cg16944958	6		0.65 (0.04)	0.64 (0.04)	0.63 (0.04)	0.00111945	0.100006	Yes
cg06065019	2		0.29 (0.05)	0.29 (0.05)	0.26 (0.04)	0.00113853	0.100547	Yes
cg27006764	7	GRB10	0.09 (0.02)	0.09 (0.02)	0.1 (0.02)	0.00113944	0.100547	Yes
cg08170837	3	RYBP	0.84 (0.04)	0.84 (0.04)	0.82 (0.04)	0.00114166	0.100547	Yes
cg21186955	7	TRIM56	0.3 (0.04)	0.3 (0.04)	0.32 (0.05)	0.00117799	0.103259	Yes
cg24441922	2	ARL4C	0.34 (0.06)	0.34 (0.06)	0.38 (0.06)	0.00123535	0.105696	Yes
cg14187678	2	TBR1	0.13 (0.03)	0.12 (0.03)	0.12 (0.03)	0.00123764	0.105696	Yes
cg12494529	10	C10orf110	0.83 (0.03)	0.83 (0.03)	0.81 (0.03)	0.00124694	0.105696	Yes
cg18887230	7	SMURF1	0.82 (0.04)	0.81 (0.04)	0.8 (0.04)	0.00124861	0.105696	No
cg08006309	16	IFT140;TMEM204	0.71 (0.05)	0.7 (0.05)	0.73 (0.05)	0.00125683	0.105696	Yes
cg14627404	3	CD96	0.86 (0.03)	0.86 (0.03)	0.85 (0.03)	0.00127254	0.105696	No
cg27009703	7	HOXA9	0.1 (0.05)	0.09 (0.05)	0.11 (0.06)	0.00128543	0.105696	Yes
cg27573991	1	C1orf150	0.49 (0.13)	0.45 (0.13)	0.46 (0.11)	0.00128923	0.105696	No
cg01594949	9	NRARP	0.64 (0.04)	0.64 (0.04)	0.63 (0.04)	0.00128941	0.105696	Yes
cg15474579	6	CDKN1A	0.67 (0.04)	0.66 (0.04)	0.65 (0.04)	0.00130913	0.105696	No
cg09084200	11	VPS26B;NCAPD3	0.3 (0.03)	0.3 (0.03)	0.29 (0.03)	0.00131977	0.105696	No
cg00116430	1		0.53 (0.04)	0.52 (0.05)	0.51 (0.04)	0.00132606	0.105696	Yes
cg26798850	19	ZNF529	0.23 (0.04)	0.21 (0.04)	0.22 (0.05)	0.00132896	0.105696	Yes
cg26856289	1	SFRS13A	0.34 (0.03)	0.34 (0.03)	0.32 (0.03)	0.00132915	0.105696	No
cg12360736	3	MBNL1;LOC401093	0.16 (0.03)	0.15 (0.03)	0.15 (0.03)	0.00133009	0.105696	Yes
cg01062937	16	ZFPM1	0.44 (0.02)	0.43 (0.02)	0.44 (0.02)	0.00133158	0.105696	Yes
cg02964434	15		0.72 (0.02)	0.71 (0.02)	0.71 (0.02)	0.00133524	0.105696	Yes
cg26003909	8		0.52 (0.03)	0.52 (0.03)	0.54 (0.03)	0.00133625	0.105696	Yes
cg08681689	3	EIF4G1	0.64 (0.03)	0.64 (0.03)	0.63 (0.03)	0.00133872	0.105696	No
cg07430820	17	CHD3	0.65 (0.02)	0.65 (0.02)	0.64 (0.02)	0.00134403	0.105696	No
cg06577850	7		0.8 (0.04)	0.79 (0.04)	0.77 (0.04)	0.00134674	0.105696	Yes
cg06595162	21	NCRNA00114	0.8 (0.02)	0.79 (0.02)	0.78 (0.02)	0.00134952	0.105696	No
cg13717434	9		0.54 (0.06)	0.53 (0.06)	0.55 (0.05)	0.00135139	0.105696	Yes
cg05194346	15		0.57 (0.06)	0.57 (0.06)	0.6 (0.05)	0.00135221	0.105696	No
cg22691256	7	WBSCR17	0.55 (0.08)	0.58 (0.07)	0.54 (0.08)	0.00135297	0.105696	Yes
cg19254163	11	GPR44	0.7 (0.03)	0.69 (0.03)	0.68 (0.03)	0.00137484	0.10687	No
cg03604424	5	TRIO	0.7 (0.03)	0.7 (0.03)	0.69 (0.03)	0.00137944	0.10687	No
cg00498211	2	SLC1A4	0.29 (0.07)	0.26 (0.07)	0.26 (0.07)	0.00139989	0.107858	No
cg09338136	5	AHRR	0.25 (0.03)	0.24 (0.03)	0.24 (0.03)	0.00140376	0.107858	No
cg08149865	8	EPB49	0.67 (0.03)	0.66 (0.03)	0.65 (0.03)	0.00144554	0.110334	No
cg21869609	19	LINGO3	0.73 (0.07)	0.72 (0.08)	0.68 (0.07)	0.00145416	0.110334	No
cg24996979	14	C14orf43	0.22 (0.02)	0.22 (0.02)	0.21 (0.03)	0.00145477	0.110334	No
cg26307871	17		0.87 (0.03)	0.86 (0.04)	0.84 (0.04)	0.00146293	0.110334	Yes
cg12825509	3	TRA2B	0.49 (0.04)	0.48 (0.04)	0.47 (0.04)	0.00148475	0.111332	Yes
cg04011173	3	GHRLOS;C3orf42	0.13 (0.06)	0.13 (0.06)	0.1 (0.04)	0.00152471	0.113211	Yes
cg27537125	1		0.2 (0.02)	0.2 (0.02)	0.19 (0.02)	0.00152569	0.113211	No
cg01838544	16	GPR114	0.16 (0.03)	0.16 (0.03)	0.18 (0.04)	0.00155698	0.114241	No
cg18397975	5	AMACR	0.61 (0.05)	0.6 (0.06)	0.58 (0.05)	0.00155749	0.114241	Yes
cg14276580	13		0.39 (0.04)	0.38 (0.04)	0.37 (0.04)	0.00156025	0.114241	Yes
cg15624624	10	TCF7L2	0.72 (0.03)	0.72 (0.03)	0.71 (0.03)	0.00156972	0.114284	No
cg23781467	6	VARS	0.72 (0.03)	0.72 (0.03)	0.74 (0.03)	0.00157309	0.114284	No
cg11190278	14	NIN	0.41 (0.03)	0.4 (0.04)	0.4 (0.04)	0.00161012	0.116428	Yes
cg03186986	2	AAK1	0.08 (0.01)	0.08 (0.01)	0.09 (0.01)	0.00161506	0.116428	Yes
cg05655806	3	CD96	0.59 (0.07)	0.59 (0.07)	0.56 (0.07)	0.00162902	0.116982	No
cg09026722	1	PEAR1	0.93 (0.01)	0.93 (0.02)	0.92 (0.02)	0.00164174	0.117356	Yes
cg10106284	2	FAM49A	0.65 (0.06)	0.65 (0.05)	0.63 (0.05)	0.00165127	0.117356	No
cg22499893	1	SFRS13A	0.47 (0.07)	0.46 (0.06)	0.44 (0.06)	0.00165308	0.117356	No
cg05527044	2		0.12 (0.03)	0.13 (0.03)	0.11 (0.03)	0.00167236	0.118275	Yes
cg13916835	17	SMG6	0.79 (0.04)	0.79 (0.05)	0.77 (0.05)	0.00168337	0.118523	No
cg22851200	7	TRIP6	0.7 (0.05)	0.69 (0.05)	0.67 (0.04)	0.00169329	0.118523	No
cg20483374	11	C1QTNF5;MFRP	0.41 (0.04)	0.4 (0.04)	0.41 (0.04)	0.00169985	0.118523	No
cg23336702	8		0.64 (0.04)	0.64 (0.04)	0.62 (0.04)	0.00170126	0.118523	Yes
cg02932780	6	VARS	0.6 (0.04)	0.59 (0.04)	0.59 (0.05)	0.0017136	0.118823	No
cg25649826	17	USP22	0.69 (0.03)	0.69 (0.03)	0.68 (0.03)	0.00171829	0.118823	Yes
cg12072028	14	RIN3	0.72 (0.08)	0.72 (0.07)	0.68 (0.07)	0.00174176	0.11959	No
cg01083131	16	THAP11;CENPT	0.39 (0.04)	0.38 (0.04)	0.37 (0.04)	0.00174219	0.11959	No
cg04242898	22	CYB5R3	0.74 (0.02)	0.74 (0.02)	0.73 (0.02)	0.00175795	0.119706	Yes
cg02205391	6	VARS	0.24 (0.03)	0.23 (0.03)	0.22 (0.03)	0.00176936	0.119706	No
cg02173782	6	TRERF1	0.82 (0.03)	0.81 (0.03)	0.81 (0.03)	0.00177448	0.119706	No
cg10190813	7	HUS1	0.13 (0.03)	0.13 (0.02)	0.12 (0.02)	0.001779	0.119706	No
cg10399789	1	GFI1	0.82 (0.04)	0.82 (0.04)	0.8 (0.04)	0.00178982	0.119706	No
cg13399816	1	GNG12	0.35 (0.04)	0.35 (0.04)	0.33 (0.04)	0.00179453	0.119706	No
cg20752878	17	ASGR1	0.74 (0.04)	0.73 (0.04)	0.74 (0.04)	0.00179517	0.119706	Yes
cg14399122	9	COL5A1	0.55 (0.04)	0.54 (0.04)	0.53 (0.03)	0.00180684	0.119732	Yes
cg10513161	3	ABCC5	0.82 (0.03)	0.82 (0.02)	0.83 (0.03)	0.00180839	0.119732	Yes
cg25305703	8		0.78 (0.04)	0.77 (0.05)	0.75 (0.04)	0.00186868	0.123229	No
cg05701125	16	SOCS1	0.15 (0.02)	0.14 (0.02)	0.14 (0.02)	0.00187441	0.123229	Yes
cg00073090	19		0.41 (0.04)	0.41 (0.04)	0.39 (0.05)	0.00188982	0.123336	No
cg21393163	1		0.11 (0.03)	0.11 (0.02)	0.1 (0.02)	0.00189572	0.123336	No
cg14548802	9	COL5A1	0.28 (0.05)	0.27 (0.04)	0.3 (0.04)	0.00189585	0.123336	Yes
cg06585203	6	EZR	0.24 (0.05)	0.23 (0.05)	0.23 (0.05)	0.001921	0.124538	Yes
cg24448421	12		0.31 (0.04)	0.3 (0.04)	0.33 (0.04)	0.00195921	0.126576	Yes
cg01874697	10	SORCS3	0.11 (0.02)	0.11 (0.02)	0.12 (0.02)	0.00197434	0.127114	Yes
cg25316484	7	HOXA6	0.66 (0.04)	0.65 (0.04)	0.64 (0.04)	0.0019902	0.127257	No
cg15611912	10	RGS10	0.58 (0.06)	0.57 (0.06)	0.55 (0.06)	0.00201032	0.127872	No
cg06151243	17		0.19 (0.05)	0.19 (0.05)	0.2 (0.04)	0.00201351	0.127872	Yes
cg14264316	9		0.72 (0.04)	0.71 (0.04)	0.7 (0.04)	0.00204437	0.128847	Yes
cg01798157	1	BTG2	0.4 (0.08)	0.38 (0.08)	0.36 (0.08)	0.00204702	0.128847	Yes
cg22193385	12	KRT7	0.18 (0.05)	0.18 (0.05)	0.16 (0.04)	0.00204958	0.128847	Yes
cg25103895	10	ADO	0.5 (0.03)	0.49 (0.04)	0.49 (0.03)	0.00206054	0.128983	No
cg16556677	11	KCNQ1OT1;KCNQ1	0.86 (0.02)	0.86 (0.02)	0.85 (0.02)	0.0020745	0.128983	No
cg24688690	5	AHRR	0.66 (0.02)	0.66 (0.02)	0.65 (0.03)	0.00208881	0.128983	No
cg14269109	17		0.21 (0.04)	0.21 (0.04)	0.23 (0.04)	0.00208897	0.128983	Yes
cg18754985	3	CLDND1	0.94 (0.01)	0.94 (0.01)	0.93 (0.01)	0.00209604	0.128983	No
cg00296038	3	VGLL4	0.88 (0.01)	0.88 (0.02)	0.87 (0.02)	0.00210629	0.128983	No
cg10762038	17	SLC46A1	0.84 (0.02)	0.84 (0.02)	0.85 (0.02)	0.002107	0.128983	Yes
cg23617947	3		0.92 (0.02)	0.91 (0.02)	0.92 (0.02)	0.00211977	0.129341	Yes
cg18468844	1	PTAFR	0.84 (0.03)	0.84 (0.03)	0.83 (0.03)	0.00219048	0.133219	Yes
cg08479476	2	PCBP1	0.3 (0.06)	0.28 (0.06)	0.28 (0.05)	0.00222493	0.134876	Yes
cg09749364	15	BMF	0.87 (0.02)	0.86 (0.02)	0.85 (0.02)	0.0022414	0.135179	Yes
cg09865015	4	LOC100130872;LOC100130872-SPON2	0.86 (0.03)	0.85 (0.03)	0.85 (0.03)	0.00224441	0.135179	Yes
cg12547807	1		0.36 (0.03)	0.35 (0.03)	0.35 (0.03)	0.00225938	0.135643	No
cg07890553	3	TMEM39A	0.39 (0.05)	0.38 (0.05)	0.4 (0.05)	0.00227478	0.13613	Yes
cg18446336	7	GNA12	0.6 (0.07)	0.59 (0.07)	0.56 (0.08)	0.00230199	0.137318	No
cg03743262	7		0.89 (0.02)	0.89 (0.02)	0.9 (0.02)	0.00233431	0.1385	Yes
cg15331301	6		0.52 (0.02)	0.52 (0.02)	0.51 (0.02)	0.00233665	0.1385	Yes
cg07877900	16	GPR114	0.16 (0.03)	0.16 (0.03)	0.17 (0.03)	0.00242798	0.143459	No
cg18487309	5	TBC1D9B	0.66 (0.03)	0.65 (0.03)	0.65 (0.03)	0.00246043	0.144917	Yes
cg08906246	4	STK32B	0.86 (0.03)	0.85 (0.03)	0.86 (0.03)	0.00248296	0.145428	Yes
cg08250921	16		0.74 (0.04)	0.73 (0.04)	0.76 (0.04)	0.00249227	0.145428	Yes
cg27000590	8	PRAGMIN	0.86 (0.02)	0.85 (0.02)	0.87 (0.02)	0.00249248	0.145428	Yes
cg13935009	1	CDK18	0.91 (0.03)	0.91 (0.03)	0.9 (0.04)	0.00250613	0.145657	Yes
cg04387347	16	ZFPM1	0.25 (0.04)	0.25 (0.05)	0.27 (0.05)	0.00251199	0.145657	Yes
cg00541303	1		0.42 (0.04)	0.41 (0.04)	0.4 (0.03)	0.00252388	0.145893	No
cg18033416	17	RHBDL3	0.68 (0.04)	0.67 (0.04)	0.67 (0.04)	0.00253505	0.146086	No
cg20295214	1	AVPR1B	0.87 (0.02)	0.86 (0.02)	0.85 (0.02)	0.00254399	0.14615	No
cg13855261	17	HS3ST3B1;MGC12916	0.21 (0.03)	0.21 (0.03)	0.19 (0.03)	0.00256713	0.146909	Yes
cg03399898	1		0.18 (0.04)	0.17 (0.04)	0.15 (0.03)	0.00257294	0.146909	No
cg05779272	9	B4GALT1	0.42 (0.03)	0.41 (0.03)	0.4 (0.02)	0.00259934	0.147621	Yes
cg13518625	8		0.12 (0.04)	0.12 (0.04)	0.1 (0.03)	0.00260122	0.147621	No
cg25840433	6	RPS6KA2	0.51 (0.02)	0.5 (0.02)	0.5 (0.02)	0.00264617	0.149717	No
cg18369990	2	FBLN7	0.54 (0.03)	0.55 (0.03)	0.56 (0.03)	0.00266654	0.150414	Yes
cg17323243	5	NDFIP1	0.02 (0.01)	0.02 (0.01)	0.02 (0.01)	0.00270351	0.151603	Yes
cg11808699	15	IL16	0.4 (0.05)	0.4 (0.05)	0.42 (0.05)	0.00270386	0.151603	Yes
cg01750611	17	TRAF4	0.16 (0.02)	0.16 (0.02)	0.15 (0.02)	0.00271296	0.151658	Yes
cg11701312	19	RPS5	0.61 (0.03)	0.6 (0.03)	0.59 (0.03)	0.00273263	0.152301	No
cg04159302	5	C5orf62	0.47 (0.05)	0.46 (0.06)	0.46 (0.05)	0.00276527	0.153662	No
cg21571160	1	C4BPB	0.83 (0.03)	0.82 (0.03)	0.82 (0.03)	0.00278979	0.154564	Yes
cg23237276	14		0.71 (0.04)	0.7 (0.04)	0.73 (0.05)	0.00281558	0.155531	Yes
cg21302563	2	UBE2F	0.43 (0.06)	0.43 (0.06)	0.45 (0.06)	0.00283216	0.155986	Yes
cg05720226	7	ST7;ST7OT2	0.8 (0.03)	0.8 (0.03)	0.79 (0.03)	0.00286704	0.157443	Yes
cg09594075	17	CRK	0.41 (0.03)	0.41 (0.03)	0.4 (0.03)	0.00296141	0.162148	Yes
cg03155159	16		0.46 (0.05)	0.45 (0.05)	0.44 (0.05)	0.00299026	0.163249	No
cg13184736	1	GNG12	0.38 (0.07)	0.37 (0.07)	0.35 (0.07)	0.0030215	0.164473	No
cg04716530	16	ITGAL	0.8 (0.03)	0.79 (0.03)	0.79 (0.03)	0.00308027	0.165148	No
cg18391972	6	C6orf129	0.84 (0.02)	0.84 (0.02)	0.83 (0.02)	0.00308831	0.165148	Yes
cg18717146	19	C19orf25	0.23 (0.04)	0.23 (0.03)	0.21 (0.03)	0.00309311	0.165148	Yes
cg03292040	2	CCDC74A	0.24 (0.04)	0.23 (0.04)	0.25 (0.04)	0.00309525	0.165148	Yes
cg09469355	1	SKI	0.52 (0.04)	0.52 (0.03)	0.5 (0.03)	0.00310017	0.165148	No
cg20059928	15		0.69 (0.05)	0.69 (0.05)	0.65 (0.06)	0.00311295	0.165148	Yes
cg08899105	15	CHD2	0.48 (0.03)	0.48 (0.03)	0.47 (0.03)	0.00311316	0.165148	Yes
cg02743070	10	ZMIZ1	0.84 (0.02)	0.83 (0.02)	0.83 (0.02)	0.0031166	0.165148	No
cg06195293	6	TRIM40	0.75 (0.04)	0.73 (0.04)	0.75 (0.03)	0.00312234	0.165148	Yes
cg03345232	14	RIN3	0.64 (0.04)	0.64 (0.04)	0.62 (0.04)	0.00318777	0.167956	No
cg02223801	7	PTPRN2	0.9 (0.03)	0.9 (0.03)	0.89 (0.03)	0.0031974	0.167956	No
cg24838825	10		0.15 (0.03)	0.15 (0.03)	0.16 (0.03)	0.00320718	0.167956	Yes
cg21008399	12	CD63	0.73 (0.02)	0.73 (0.02)	0.73 (0.02)	0.00321358	0.167956	Yes
cg12430618	1	FAIM3	0.16 (0.03)	0.16 (0.03)	0.17 (0.03)	0.00322042	0.167956	No
cg03279631	16		0.9 (0.01)	0.89 (0.01)	0.89 (0.02)	0.00328454	0.170557	Yes
cg25139636	15	ANP32A	0.8 (0.03)	0.8 (0.03)	0.78 (0.02)	0.00329069	0.170557	Yes
cg08790319	16	RAB26	0.68 (0.03)	0.68 (0.03)	0.67 (0.03)	0.00329769	0.170557	Yes
cg05183538	16	ZFPM1	0.37 (0.04)	0.37 (0.04)	0.39 (0.04)	0.00336505	0.173219	Yes
cg06235438	16	ITGAL	0.85 (0.04)	0.84 (0.03)	0.83 (0.03)	0.00336772	0.173219	No
cg26364091	22	CHADL	0.63 (0.02)	0.63 (0.02)	0.63 (0.02)	0.00338405	0.173576	Yes
cg10874644	5		0.73 (0.05)	0.72 (0.05)	0.75 (0.04)	0.00339781	0.173576	Yes
cg05209515	22	C1QTNF6	0.87 (0.02)	0.86 (0.02)	0.87 (0.02)	0.00341014	0.173576	Yes
cg26487157	2	PCBP1	0.07 (0.03)	0.06 (0.03)	0.06 (0.02)	0.00341184	0.173576	Yes
cg13448906	2	IGFBP5	0.04 (0.01)	0.04 (0.01)	0.04 (0.01)	0.00343289	0.173811	Yes
cg05077231	13	MLNR	0.71 (0.04)	0.7 (0.04)	0.69 (0.04)	0.00344211	0.173811	Yes
cg11231349	1	NOS1AP	0.85 (0.03)	0.84 (0.04)	0.84 (0.04)	0.0034515	0.173811	No
cg27460040	8	TACC1	0.87 (0.02)	0.87 (0.02)	0.86 (0.02)	0.00345541	0.173811	Yes
cg23233742	5		0.72 (0.03)	0.72 (0.03)	0.71 (0.03)	0.00346301	0.173811	Yes
cg01294327	19	LINGO3	0.66 (0.08)	0.65 (0.08)	0.62 (0.07)	0.00348104	0.174248	No
cg06972908	16	ITGAL	0.81 (0.03)	0.81 (0.03)	0.8 (0.03)	0.00350125	0.174563	No
cg07964754	16	COTL1	0.79 (0.06)	0.78 (0.05)	0.77 (0.05)	0.00350603	0.174563	No
cg20306574	14	FITM1	0.83 (0.03)	0.83 (0.04)	0.85 (0.03)	0.00352549	0.174867	Yes
cg02657160	3	CPOX	0.88 (0.02)	0.88 (0.02)	0.87 (0.02)	0.00353088	0.174867	No
cg07661899	12	TENC1	0.93 (0.01)	0.93 (0.01)	0.93 (0.01)	0.00356438	0.175851	Yes
cg17907003	1		0.74 (0.04)	0.75 (0.04)	0.72 (0.04)	0.00361831	0.176857	Yes
cg15693572	3		0.63 (0.09)	0.65 (0.09)	0.68 (0.08)	0.0036184	0.176857	No
cg06589051	2	TGFBRAP1	0.81 (0.03)	0.81 (0.04)	0.8 (0.03)	0.00364826	0.177591	Yes
cg26701785	6	SYNJ2	0.82 (0.05)	0.82 (0.04)	0.85 (0.04)	0.00365246	0.177591	No
cg16021018	3	CCRL2	0.27 (0.04)	0.26 (0.04)	0.28 (0.04)	0.00367464	0.178206	Yes
cg11700584	14	RPL36AL;MGAT2	0.37 (0.05)	0.36 (0.05)	0.34 (0.05)	0.00369484	0.178721	Yes
cg11662745	5	PPP2R2B	0.9 (0.01)	0.89 (0.01)	0.89 (0.02)	0.00371998	0.179219	Yes
cg00151370	6	ATXN1	0.33 (0.06)	0.32 (0.06)	0.35 (0.05)	0.00373203	0.179219	Yes
cg25607920	1	HIVEP3	0.39 (0.09)	0.37 (0.09)	0.42 (0.09)	0.00373393	0.179219	No
cg05043311	1	NDUFS2	0.46 (0.03)	0.46 (0.04)	0.48 (0.04)	0.00376468	0.180096	Yes
cg11496569	1	AKT3	0.57 (0.03)	0.57 (0.03)	0.56 (0.03)	0.00377149	0.180096	No
cg01882991	6		0.6 (0.03)	0.59 (0.03)	0.59 (0.03)	0.00378502	0.180281	No
cg17861836	17	C17orf56	0.48 (0.05)	0.46 (0.05)	0.46 (0.06)	0.00381273	0.181139	Yes
cg01765406	2		0.5 (0.05)	0.5 (0.05)	0.48 (0.05)	0.0039186	0.185696	Yes
cg11253886	2		0.67 (0.04)	0.66 (0.04)	0.69 (0.04)	0.003945	0.186474	No
cg17464820	11	SIK3	0.68 (0.04)	0.68 (0.05)	0.66 (0.04)	0.00396154	0.186782	Yes
cg15519474	17	PRKCA	0.91 (0.02)	0.9 (0.02)	0.9 (0.02)	0.00398679	0.187488	No
cg23321397	6		0.51 (0.05)	0.51 (0.05)	0.49 (0.05)	0.00401627	0.187488	Yes
cg13608733	11		0.16 (0.04)	0.15 (0.04)	0.17 (0.04)	0.00402525	0.187488	Yes
cg21121843	4	HTT	0.37 (0.06)	0.37 (0.06)	0.35 (0.06)	0.00402671	0.187488	No
cg03652173	12	CCDC59;C12orf26	0.32 (0.05)	0.32 (0.05)	0.3 (0.04)	0.00406099	0.188614	Yes
cg22635676	2	SNED1	0.29 (0.14)	0.3 (0.15)	0.36 (0.15)	0.00407932	0.188995	No
cg17598574	1	RAP1A	0.62 (0.03)	0.62 (0.02)	0.61 (0.02)	0.00412701	0.190731	Yes
cg04811945	4	CD38	0.2 (0.04)	0.21 (0.04)	0.22 (0.04)	0.00425505	0.195299	No
cg04730665	2	AGAP1	0.16 (0.03)	0.16 (0.03)	0.17 (0.03)	0.0042626	0.195299	Yes
cg24681499	1	FOXJ3	0.69 (0.02)	0.7 (0.02)	0.71 (0.02)	0.00426672	0.195299	Yes
cg24154132	14	TRAF3	0.35 (0.04)	0.34 (0.04)	0.36 (0.04)	0.00426888	0.195299	Yes
cg07549924	4	ZNF595;ZNF718	0.71 (0.05)	0.7 (0.05)	0.68 (0.04)	0.00427816	0.195299	Yes
cg03329949	3	CACNA2D2	0.76 (0.04)	0.77 (0.04)	0.75 (0.04)	0.00429827	0.195457	Yes
cg04986324	22	LOC150381;C22orf26	0.64 (0.07)	0.63 (0.07)	0.63 (0.07)	0.00430731	0.195457	Yes
cg04021592	2		0.19 (0.05)	0.17 (0.05)	0.17 (0.06)	0.0043222	0.195457	Yes
cg07465627	17	STXBP4	0.36 (0.03)	0.36 (0.02)	0.35 (0.03)	0.0043695	0.19706	No
cg12406027	19	PAK4	0.28 (0.02)	0.27 (0.02)	0.26 (0.02)	0.00439073	0.19754	No
cg24735226	1	CACHD1	0.74 (0.06)	0.75 (0.06)	0.77 (0.05)	0.00441607	0.19759	Yes
cg00193668	9	HINT2	0.59 (0.04)	0.58 (0.03)	0.58 (0.04)	0.00441941	0.19759	Yes
cg16043888	19	TNFSF14	0.78 (0.02)	0.78 (0.03)	0.77 (0.03)	0.00442358	0.19759	Yes
cg02852407	1	CD34	0.38 (0.05)	0.37 (0.05)	0.38 (0.06)	0.00445526	0.198192	Yes
cg03935116	12	FAM60A;FLJ13224	0.15 (0.02)	0.15 (0.02)	0.14 (0.02)	0.00445828	0.198192	Yes
cg02985540	13		0.32 (0.04)	0.31 (0.04)	0.3 (0.03)	0.00447612	0.198512	Yes
cg12619504	5	SQSTM1;MGAT4B	0.62 (0.04)	0.62 (0.04)	0.6 (0.04)	0.00451227	0.199284	Yes
cg05603985	1	SKI	0.3 (0.02)	0.3 (0.02)	0.29 (0.02)	0.00451487	0.199284	No
cg12166476	13	LMO7	0.41 (0.05)	0.4 (0.05)	0.42 (0.06)	0.00461384	0.201797	Yes
cg22274234	12	KCTD10	0.34 (0.04)	0.34 (0.04)	0.34 (0.04)	0.00461968	0.201797	Yes
cg18758585	1		0.08 (0.01)	0.08 (0.01)	0.07 (0.01)	0.00463236	0.201797	Yes
cg23222488	5		0.74 (0.04)	0.73 (0.04)	0.75 (0.04)	0.00464007	0.201797	Yes
cg12621315	2		0.31 (0.05)	0.3 (0.04)	0.29 (0.04)	0.00465205	0.201797	Yes
cg08791922	17	TMEM132E	0.36 (0.03)	0.36 (0.03)	0.37 (0.03)	0.00465538	0.201797	Yes
cg18405341	22	ATF4	0.57 (0.03)	0.56 (0.03)	0.56 (0.03)	0.00466833	0.201797	No
cg05124129	12	CPNE8	0.1 (0.04)	0.09 (0.04)	0.1 (0.04)	0.00466907	0.201797	Yes
cg05514971	9	FAM129B	0.5 (0.03)	0.49 (0.03)	0.48 (0.03)	0.00470836	0.203025	Yes
cg08255481	16	BANP	0.77 (0.03)	0.77 (0.03)	0.78 (0.03)	0.00472003	0.203059	Yes
cg01651915	8		0.39 (0.07)	0.39 (0.07)	0.36 (0.08)	0.00473698	0.203211	Yes
cg05522498	11	DCPS	0.63 (0.04)	0.62 (0.04)	0.61 (0.04)	0.00476488	0.203581	Yes
cg04858631	10	DDIT4	0.67 (0.06)	0.66 (0.06)	0.65 (0.05)	0.00481548	0.205274	No
cg16145216	1	HIVEP3	0.32 (0.04)	0.32 (0.04)	0.34 (0.04)	0.00484379	0.20601	No
cg12910268	7	DNAJB6	0.89 (0.02)	0.89 (0.02)	0.9 (0.02)	0.00487104	0.206314	Yes
cg26995224	12	KDM2B	0.59 (0.07)	0.59 (0.07)	0.55 (0.07)	0.00489045	0.206314	No
cg16519923	16	ITGAL	0.78 (0.04)	0.77 (0.05)	0.76 (0.04)	0.00489515	0.206314	No
cg20131596	5	PAM	0.64 (0.04)	0.63 (0.03)	0.62 (0.03)	0.00494067	0.207764	No
cg26707709	2	SNED1	0.16 (0.06)	0.17 (0.07)	0.19 (0.06)	0.00499898	0.208398	No
cg24033122	16	ITGAL	0.25 (0.05)	0.25 (0.05)	0.23 (0.05)	0.00501192	0.208398	No
cg22490254	2		0.19 (0.04)	0.18 (0.03)	0.2 (0.04)	0.00502005	0.208398	Yes
cg23166773	1	SDCCAG8;AKT3	0.51 (0.05)	0.5 (0.05)	0.52 (0.05)	0.00502273	0.208398	No
cg04115307	14		0.62 (0.05)	0.61 (0.05)	0.59 (0.05)	0.00508831	0.210308	Yes
cg21415227	11	SPON1	0.31 (0.02)	0.32 (0.02)	0.3 (0.02)	0.0050997	0.210308	Yes
cg06935608	8		0.66 (0.03)	0.65 (0.04)	0.67 (0.03)	0.00510711	0.210308	Yes
cg21304158	2	SNED1	0.47 (0.02)	0.47 (0.02)	0.46 (0.02)	0.005148	0.210308	No
cg22035959	19	ARID3A	0.79 (0.03)	0.78 (0.04)	0.77 (0.03)	0.00516259	0.210308	Yes
cg04508951	1		0.51 (0.04)	0.5 (0.05)	0.49 (0.03)	0.00518151	0.210308	Yes
cg14702960	12		0.82 (0.02)	0.82 (0.02)	0.82 (0.02)	0.00519165	0.210308	Yes
cg22163280	17		0.76 (0.03)	0.75 (0.03)	0.75 (0.03)	0.00521087	0.210308	Yes
cg24838345	8	MTSS1	0.88 (0.02)	0.88 (0.03)	0.87 (0.03)	0.00521758	0.210308	No
cg24502904	12	EIF4B	0.35 (0.04)	0.35 (0.04)	0.33 (0.03)	0.0052467	0.210308	No
cg00179921	22	RPS19BP1	0.75 (0.03)	0.75 (0.03)	0.75 (0.03)	0.00525427	0.210308	Yes
cg21461300	13	RASA3	0.15 (0.05)	0.15 (0.05)	0.13 (0.05)	0.0052573	0.210308	No
cg11202634	8		0.83 (0.02)	0.83 (0.02)	0.84 (0.02)	0.00525959	0.210308	Yes
cg06338710	1	GFI1	0.85 (0.03)	0.86 (0.03)	0.84 (0.04)	0.00526	0.210308	No
cg05713794	3	GP5	0.9 (0.02)	0.9 (0.02)	0.91 (0.02)	0.00527085	0.210308	No
cg17290213	11	EHBP1L1	0.46 (0.03)	0.47 (0.03)	0.45 (0.03)	0.00527634	0.210308	Yes
cg13847322	9	RXRA	0.72 (0.03)	0.72 (0.03)	0.71 (0.03)	0.00528164	0.210308	Yes
cg01839993	10	DDIT4	0.38 (0.04)	0.37 (0.04)	0.36 (0.04)	0.00528275	0.210308	No
cg06439941	7	GNG11	0.84 (0.03)	0.85 (0.03)	0.86 (0.03)	0.00531608	0.21036	No
cg23424933	2		0.11 (0.02)	0.1 (0.02)	0.11 (0.03)	0.00531778	0.21036	Yes
cg17924476	5	AHRR	0.49 (0.06)	0.49 (0.06)	0.52 (0.05)	0.00531786	0.21036	No
cg24556382	4	GALNT7	0.8 (0.04)	0.79 (0.04)	0.77 (0.05)	0.00533823	0.210418	No
cg22891595	3		0.68 (0.04)	0.68 (0.04)	0.69 (0.04)	0.00534849	0.210418	No
cg19827923	2	GPR55	0.86 (0.02)	0.85 (0.02)	0.85 (0.02)	0.00537417	0.210418	No
cg05767404	1	C1orf150	0.36 (0.08)	0.34 (0.08)	0.35 (0.07)	0.00537571	0.210418	No
cg08640824	1	SKI	0.41 (0.06)	0.41 (0.06)	0.38 (0.06)	0.00538776	0.210418	No
cg17585528	3	LPP	0.89 (0.03)	0.89 (0.03)	0.87 (0.03)	0.00539376	0.210418	Yes
cg01759110	8	ADAMDEC1	0.83 (0.05)	0.82 (0.04)	0.8 (0.04)	0.00539821	0.210418	Yes
cg05797623	4	ADAMTS3	0.86 (0.02)	0.86 (0.02)	0.85 (0.02)	0.00542529	0.211033	Yes
cg20469837	2	GALNT5	0.26 (0.04)	0.25 (0.04)	0.27 (0.03)	0.00555542	0.214643	No
cg12364755	17	PAFAH1B1	0.61 (0.03)	0.61 (0.03)	0.6 (0.03)	0.00557205	0.214643	No
cg02917867	19		0.41 (0.04)	0.41 (0.04)	0.4 (0.05)	0.00558161	0.214643	Yes
cg27182293	19	ZNF611	0.08 (0.02)	0.08 (0.01)	0.09 (0.01)	0.0055871	0.214643	Yes
cg20051772	12	DGKA	0.26 (0.04)	0.26 (0.04)	0.25 (0.04)	0.0056388	0.215583	No
cg00360761	2		0.15 (0.04)	0.15 (0.04)	0.17 (0.03)	0.00565576	0.215583	Yes
cg19501902	3	CD96	0.74 (0.04)	0.73 (0.04)	0.72 (0.05)	0.00565625	0.215583	No
cg13824500	10	VTI1A	0.79 (0.04)	0.79 (0.04)	0.77 (0.04)	0.00565823	0.215583	Yes
cg24426691	13	CLDN10	0.18 (0.03)	0.18 (0.03)	0.18 (0.03)	0.0056693	0.215583	Yes
cg22417733	6	FBXO5	0.22 (0.05)	0.21 (0.05)	0.19 (0.04)	0.00570172	0.216376	Yes
cg21949194	2		0.44 (0.05)	0.43 (0.05)	0.42 (0.04)	0.00571762	0.216539	Yes
cg11555067	2	INPP4A	0.3 (0.03)	0.3 (0.03)	0.28 (0.03)	0.00577705	0.217662	Yes
cg20556803	7	MAD1L1	0.37 (0.03)	0.37 (0.03)	0.38 (0.03)	0.00578224	0.217662	No
cg23283335	17	ABR	0.47 (0.05)	0.45 (0.04)	0.45 (0.05)	0.00587434	0.219865	Yes
cg05628163	3	CCNL1	0.05 (0.01)	0.05 (0.01)	0.05 (0.01)	0.00587611	0.219865	Yes
cg10062919	17	RARA	0.49 (0.02)	0.49 (0.02)	0.48 (0.03)	0.00588913	0.219912	No
cg17359265	5	ADAMTS2	0.54 (0.03)	0.55 (0.03)	0.54 (0.02)	0.00596015	0.22212	Yes
cg19211853	13	RBM26	0.16 (0.04)	0.16 (0.04)	0.14 (0.03)	0.00601303	0.223297	No
cg26718213	2	SNED1	0.33 (0.09)	0.33 (0.09)	0.37 (0.09)	0.00602705	0.223297	No
cg15542713	1	HIVEP3	0.56 (0.07)	0.55 (0.07)	0.59 (0.08)	0.00603299	0.223297	No
cg09325711	7	RALA	0.09 (0.03)	0.08 (0.03)	0.07 (0.02)	0.006076	0.223297	No
cg07029024	11		0.63 (0.05)	0.63 (0.05)	0.65 (0.05)	0.0060835	0.223297	No
cg07381806	19	MOBKL2A	0.38 (0.06)	0.38 (0.06)	0.35 (0.05)	0.00610089	0.223297	No
cg14411375	17	NME2;NME1-NME2	0.87 (0.02)	0.87 (0.02)	0.86 (0.03)	0.00610119	0.223297	Yes
cg01588379	7	PRKAG2	0.87 (0.04)	0.86 (0.04)	0.85 (0.04)	0.00610206	0.223297	Yes
cg07285983	1	RABGAP1L	0.83 (0.04)	0.84 (0.03)	0.84 (0.04)	0.00610316	0.223297	Yes
cg13277254	5	FBXW11	0.68 (0.03)	0.67 (0.03)	0.67 (0.03)	0.00611134	0.223297	Yes
cg11961495	10	ZMIZ1	0.7 (0.03)	0.7 (0.04)	0.68 (0.03)	0.00613693	0.223794	No
cg10126903	16	SPN	0.06 (0.01)	0.06 (0.01)	0.07 (0.01)	0.00615966	0.224185	No
cg05529343	3		0.56 (0.11)	0.57 (0.11)	0.61 (0.09)	0.00618083	0.224329	Yes
cg06321596	16	XYLT1	0.44 (0.05)	0.43 (0.05)	0.41 (0.04)	0.00618764	0.224329	No
cg08558340	7	SRRT	0.65 (0.07)	0.65 (0.07)	0.62 (0.07)	0.0062116	0.224617	Yes
cg09289148	16		0.57 (0.04)	0.56 (0.04)	0.56 (0.03)	0.00621964	0.224617	Yes
cg16871828	1	ANKRD34A	0.32 (0.05)	0.31 (0.05)	0.33 (0.04)	0.0063047	0.227249	Yes
cg11145461	1	CSRP1	0.88 (0.03)	0.87 (0.03)	0.86 (0.03)	0.00636404	0.228477	No
cg22441770	1	CRTC2	0.72 (0.03)	0.71 (0.04)	0.71 (0.03)	0.00636909	0.228477	No
cg02644867	19	C19orf23;CIRBP	0.77 (0.03)	0.77 (0.03)	0.77 (0.02)	0.00637548	0.228477	Yes
cg14973055	17	DNAI2	0.53 (0.04)	0.54 (0.04)	0.55 (0.04)	0.0064579	0.230546	Yes
cg00315394	5	MGAT4B;SQSTM1	0.78 (0.02)	0.78 (0.02)	0.78 (0.02)	0.00649561	0.230575	Yes
cg17024919	3	ZNF385D	0.41 (0.09)	0.39 (0.08)	0.37 (0.09)	0.00650875	0.230575	No
cg19713851	2	ALPP	0.44 (0.09)	0.43 (0.09)	0.4 (0.07)	0.00651646	0.230575	No
cg27615603	16	PYCARD	0.53 (0.04)	0.52 (0.04)	0.51 (0.03)	0.00651945	0.230575	Yes
cg00917251	1	RCAN3	0.14 (0.03)	0.15 (0.03)	0.13 (0.03)	0.00652046	0.230575	Yes
cg01744331	11	KCNQ1OT1;KCNQ1	0.9 (0.03)	0.89 (0.03)	0.89 (0.04)	0.00657211	0.23157	No
cg12103569	12	SFRS8	0.49 (0.04)	0.49 (0.04)	0.5 (0.04)	0.00657834	0.23157	Yes
cg27457191	7	PHTF2	0.75 (0.04)	0.75 (0.04)	0.74 (0.04)	0.00658581	0.23157	No
cg15194251	11		0.8 (0.03)	0.8 (0.03)	0.79 (0.03)	0.00664727	0.233292	Yes
cg10179300	5	TRIO	0.89 (0.02)	0.88 (0.02)	0.87 (0.02)	0.00667589	0.233857	No
cg20438687	17	MINK1	0.72 (0.04)	0.71 (0.04)	0.71 (0.04)	0.00669236	0.233995	Yes
cg16503724	3	PLCL2	0.5 (0.04)	0.5 (0.04)	0.51 (0.03)	0.00672879	0.234531	Yes
cg20684110	10	ADO	0.39 (0.05)	0.38 (0.05)	0.37 (0.04)	0.00676569	0.234531	No
cg17960164	8	PLEC1	0.84 (0.02)	0.83 (0.03)	0.84 (0.02)	0.00676759	0.234531	No
cg26460530	22		0.26 (0.03)	0.25 (0.03)	0.25 (0.03)	0.00676793	0.234531	Yes
cg02856338	8		0.07 (0.02)	0.07 (0.02)	0.08 (0.02)	0.00677052	0.234531	Yes
cg04195684	22	MLC1	0.81 (0.02)	0.81 (0.02)	0.8 (0.02)	0.00680617	0.23533	Yes
cg07889201	20	ZNF343	0.35 (0.03)	0.35 (0.03)	0.34 (0.03)	0.00689333	0.237465	Yes
cg26971710	22	PPPDE2;XRCC6	0.22 (0.03)	0.21 (0.03)	0.2 (0.03)	0.00690201	0.237465	Yes
cg14483935	12	TUBA1B	0.79 (0.04)	0.78 (0.04)	0.78 (0.03)	0.00690608	0.237465	Yes
cg23126152	12	SSH1	0.64 (0.03)	0.64 (0.03)	0.63 (0.03)	0.0069271	0.23775	No
cg20588285	21	AIRE	0.75 (0.03)	0.75 (0.03)	0.74 (0.03)	0.00696021	0.238448	No
cg15457390	4	ADD1	0.24 (0.04)	0.23 (0.04)	0.24 (0.03)	0.00699387	0.239125	Yes
cg22763680	17	SLFN12L	0.12 (0.03)	0.12 (0.03)	0.13 (0.03)	0.00701728	0.239125	Yes
cg14316944	17		0.89 (0.02)	0.88 (0.02)	0.88 (0.03)	0.00703235	0.239125	Yes
cg24882673	8	ZMAT4	0.15 (0.04)	0.15 (0.04)	0.15 (0.03)	0.00703595	0.239125	Yes
cg17641566	10	CDH23	0.75 (0.04)	0.74 (0.04)	0.75 (0.04)	0.00704403	0.239125	Yes
cg06866033	5	GNPDA1	0.79 (0.04)	0.78 (0.04)	0.77 (0.04)	0.0070595	0.239216	Yes
cg09352789	10	XPNPEP1	0.29 (0.02)	0.28 (0.02)	0.28 (0.02)	0.00707575	0.239332	No
cg04685387	10	PARD3	0.55 (0.05)	0.54 (0.05)	0.52 (0.05)	0.00710516	0.239765	No
cg00697290	3		0.77 (0.05)	0.77 (0.05)	0.79 (0.05)	0.00711669	0.239765	Yes
cg06711259	22	JOSD1	0.88 (0.02)	0.88 (0.02)	0.87 (0.03)	0.00714775	0.240028	Yes
cg23966547	11	SLC43A3	0.83 (0.03)	0.82 (0.03)	0.82 (0.03)	0.00718335	0.240509	No
cg03019986	17	HOXB3	0.79 (0.03)	0.79 (0.03)	0.77 (0.03)	0.00720066	0.240509	Yes
cg04969688	15	TJP1	0.23 (0.04)	0.22 (0.04)	0.23 (0.03)	0.00720072	0.240509	Yes
cg27365342	6	PHACTR1	0.65 (0.03)	0.65 (0.03)	0.66 (0.03)	0.00728376	0.24244	Yes
cg13374901	20	TAF4	0.55 (0.03)	0.54 (0.03)	0.53 (0.03)	0.0072917	0.24244	Yes
cg15212295	17	PRKCA	0.81 (0.03)	0.8 (0.03)	0.8 (0.03)	0.00730564	0.24244	No
cg26212966	11		0.15 (0.01)	0.15 (0.01)	0.16 (0.02)	0.0073255	0.24244	Yes
cg20426710	22	ZBED4	0.37 (0.06)	0.36 (0.05)	0.37 (0.07)	0.00733329	0.24244	Yes
cg06361984	16	NDE1	0.94 (0.01)	0.94 (0.01)	0.94 (0.01)	0.00733645	0.24244	Yes
cg13645296	15	DAPK2	0.85 (0.03)	0.85 (0.03)	0.86 (0.03)	0.00736564	0.242975	Yes
cg02150926	14		0.68 (0.04)	0.68 (0.04)	0.67 (0.03)	0.00738163	0.243073	Yes
cg22698028	5	AHRR	0.18 (0.02)	0.19 (0.03)	0.2 (0.03)	0.00740543	0.243151	No
cg22367631	1	MACF1	0.18 (0.03)	0.18 (0.03)	0.17 (0.03)	0.00741136	0.243151	Yes
cg17076667	10	BAG3	0.84 (0.03)	0.84 (0.03)	0.83 (0.03)	0.00742305	0.243151	No
cg03523740	1	TXLNA	0.36 (0.02)	0.36 (0.02)	0.35 (0.02)	0.0074651	0.244099	Yes
cg03599224	6	LTA	0.77 (0.03)	0.77 (0.03)	0.76 (0.03)	0.00751252	0.245221	Yes
cg09874754	1		0.66 (0.02)	0.66 (0.02)	0.67 (0.02)	0.00760547	0.246331	Yes
cg14194397	18	U58;SNORD58C;RPL17	0.85 (0.03)	0.84 (0.03)	0.84 (0.03)	0.00760807	0.246331	No
cg00485194	3	ZNF385D	0.15 (0.04)	0.14 (0.04)	0.13 (0.04)	0.00761125	0.246331	No
cg06868100	7	PRR15	0.27 (0.07)	0.26 (0.07)	0.24 (0.06)	0.00761251	0.246331	No
cg26988138	19	GNG7	0.19 (0.06)	0.17 (0.05)	0.19 (0.06)	0.00763184	0.24653	Yes
cg07298547	16		0.75 (0.04)	0.74 (0.03)	0.77 (0.04)	0.00764758	0.246611	Yes
cg11666770	19		0.84 (0.06)	0.83 (0.06)	0.81 (0.07)	0.00766659	0.246798	No
cg17065712	10	ZMIZ1	0.9 (0.02)	0.89 (0.02)	0.89 (0.02)	0.00773634	0.248435	No
cg10767336	12	KCNA1	0.1 (0.01)	0.1 (0.01)	0.11 (0.01)	0.00774405	0.248435	Yes
cg20419110	6	C6orf154	0.72 (0.04)	0.71 (0.04)	0.71 (0.03)	0.00776408	0.248547	Yes
cg05043716	8	DOCK5	0.91 (0.01)	0.9 (0.01)	0.9 (0.01)	0.00777416	0.248547	Yes
cg19851909	11	GPR83	0.16 (0.03)	0.15 (0.04)	0.16 (0.04)	0.00782129	0.249626	Yes
cg22579224	15	KIAA1199	0.62 (0.03)	0.61 (0.03)	0.62 (0.03)	0.00785659	0.250325	Yes
cg05609160	15		0.41 (0.04)	0.41 (0.04)	0.39 (0.04)	0.00788277	0.250731	Yes
cg19708901	1	KIAA1614	0.78 (0.03)	0.77 (0.03)	0.77 (0.03)	0.00789973	0.250736	Yes
cg04490079	3	OR5K2	0.93 (0.02)	0.93 (0.02)	0.94 (0.02)	0.00790978	0.250736	Yes
cg21656246	15	SLCO3A1	0.79 (0.04)	0.79 (0.04)	0.77 (0.04)	0.00794042	0.250748	Yes
cg06096336	2	PSMD1;HTR2B	0.58 (0.05)	0.57 (0.04)	0.57 (0.05)	0.0079494	0.250748	No
cg21048162	14	BATF	0.45 (0.04)	0.45 (0.04)	0.47 (0.04)	0.00797489	0.250748	Yes
cg03742137	2	AGAP1	0.14 (0.02)	0.15 (0.02)	0.14 (0.03)	0.00799535	0.250748	Yes
cg03517919	1	KIF1B	0.55 (0.04)	0.54 (0.04)	0.56 (0.03)	0.00800729	0.250748	Yes
cg14277403	9	ANP32B	0.79 (0.03)	0.78 (0.03)	0.78 (0.03)	0.00801036	0.250748	Yes
cg14857764	13		0.17 (0.04)	0.16 (0.04)	0.17 (0.04)	0.00803208	0.250748	Yes
cg01127300	22		0.57 (0.05)	0.56 (0.04)	0.55 (0.05)	0.00803451	0.250748	No
cg27198696	6	LY6G6E	0.57 (0.04)	0.57 (0.05)	0.59 (0.04)	0.00806297	0.250748	Yes
cg23750151	6	PSMB8	0.19 (0.04)	0.19 (0.04)	0.21 (0.04)	0.0080662	0.250748	No
cg14099685	11	CUGBP1	0.31 (0.02)	0.31 (0.03)	0.3 (0.02)	0.00807132	0.250748	No
cg13772414	2	EPHA4	0.41 (0.04)	0.4 (0.03)	0.39 (0.03)	0.00822439	0.254919	Yes
cg12165685	19	SLC1A5	0.08 (0.02)	0.08 (0.02)	0.07 (0.02)	0.00823327	0.254919	No
cg10633827	12	KRT74	0.8 (0.02)	0.8 (0.03)	0.79 (0.03)	0.00824688	0.254919	Yes
cg10359157	13	DLEU7	0.81 (0.04)	0.81 (0.04)	0.79 (0.04)	0.0082602	0.254919	Yes
cg04367503	19	NFIX	0.52 (0.08)	0.51 (0.08)	0.48 (0.07)	0.00829466	0.255411	Yes
cg10200202	10	RGS10	0.07 (0.01)	0.07 (0.01)	0.06 (0.01)	0.00832393	0.255411	No
cg10403394	15	TPM1	0.4 (0.08)	0.4 (0.08)	0.43 (0.08)	0.00832569	0.255411	No
cg23079012	2		0.97 (0.01)	0.97 (0.01)	0.97 (0.01)	0.00833085	0.255411	No
cg23047500	10	KIAA1598	0.19 (0.03)	0.18 (0.03)	0.2 (0.02)	0.00837076	0.256214	Yes
cg15246238	7	FSCN1	0.8 (0.03)	0.79 (0.04)	0.78 (0.04)	0.00845362	0.257904	Yes
cg04304450	22	BIK	0.44 (0.03)	0.44 (0.03)	0.45 (0.03)	0.00848757	0.258497	Yes
cg14004678	17	CANT1	0.5 (0.03)	0.49 (0.03)	0.5 (0.03)	0.00850099	0.258497	Yes
cg19940644	1		0.39 (0.06)	0.39 (0.06)	0.37 (0.06)	0.00851457	0.258497	No
cg26105278	1	TP73	0.28 (0.03)	0.28 (0.03)	0.27 (0.03)	0.0085381	0.25879	Yes
cg18500830	10	CAMK1D	0.92 (0.02)	0.92 (0.02)	0.92 (0.01)	0.00859778	0.260112	Yes
cg15709265	3		0.45 (0.09)	0.47 (0.11)	0.46 (0.1)	0.00861636	0.260112	Yes
cg05221370	7	LRRN3;IMMP2L	0.2 (0.04)	0.2 (0.03)	0.18 (0.04)	0.00867509	0.260112	No
cg17560073	8		0.21 (0.05)	0.21 (0.05)	0.23 (0.06)	0.00872084	0.260112	Yes
cg15937073	1	HIVEP3	0.35 (0.07)	0.33 (0.06)	0.36 (0.05)	0.00873395	0.260112	No
cg02431562	2	DUSP2	0.72 (0.04)	0.72 (0.04)	0.71 (0.04)	0.00874336	0.260112	Yes
cg12181459	10	GATA3	0.48 (0.06)	0.48 (0.06)	0.45 (0.05)	0.00878809	0.260112	No
cg11832534	1	WDR8	0.84 (0.03)	0.84 (0.03)	0.85 (0.02)	0.00879838	0.260112	Yes
cg05154390	1	MRPS15	0.32 (0.03)	0.32 (0.03)	0.31 (0.03)	0.00880248	0.260112	No
cg26226142	5	CHSY3	0.12 (0.03)	0.11 (0.03)	0.12 (0.02)	0.00880678	0.260112	Yes
cg03710029	17	SLC38A10	0.46 (0.03)	0.46 (0.03)	0.47 (0.03)	0.00880843	0.260112	Yes
cg03236939	17	GPRC5C	0.08 (0.01)	0.08 (0.01)	0.08 (0.01)	0.00881566	0.260112	Yes
cg01502872	6	HSD17B8	0.31 (0.03)	0.31 (0.03)	0.3 (0.02)	0.00881659	0.260112	Yes
cg07969918	22	PIK3IP1	0.36 (0.03)	0.36 (0.03)	0.35 (0.02)	0.00881731	0.260112	No
cg05707236	2	FAM179A	0.69 (0.02)	0.68 (0.02)	0.68 (0.02)	0.00881854	0.260112	Yes
cg06433467	5		0.13 (0.04)	0.12 (0.04)	0.11 (0.04)	0.00885645	0.260474	Yes
cg01960979	16	IFT140	0.9 (0.02)	0.9 (0.02)	0.89 (0.02)	0.00885872	0.260474	Yes
cg22407942	7	SNORD93	0.27 (0.04)	0.27 (0.04)	0.24 (0.04)	0.00887547	0.260557	No
cg06405563	17		0.57 (0.04)	0.57 (0.04)	0.59 (0.04)	0.00890204	0.260926	Yes
cg05661533	5	LPCAT1	0.41 (0.04)	0.41 (0.04)	0.4 (0.04)	0.00892288	0.261127	No
cg00689225	14	NFKBIA	0.74 (0.05)	0.73 (0.05)	0.73 (0.05)	0.00899354	0.262783	No
cg26203136	7	PRKAR1B	0.73 (0.03)	0.72 (0.03)	0.71 (0.03)	0.00904465	0.262909	No
cg23367119	14	C14orf43	0.83 (0.02)	0.83 (0.02)	0.82 (0.02)	0.00905354	0.262909	No
cg22455529	17	KIAA0195	0.87 (0.02)	0.87 (0.03)	0.88 (0.03)	0.00905618	0.262909	No
cg12147622	10		0.62 (0.05)	0.62 (0.05)	0.61 (0.05)	0.00906588	0.262909	No
cg26140790	10	LHPP	0.31 (0.02)	0.31 (0.02)	0.32 (0.03)	0.00907387	0.262909	No
cg02288088	2		0.13 (0.03)	0.13 (0.03)	0.12 (0.02)	0.00909288	0.262909	Yes
cg10920224	14	TRAF3	0.45 (0.1)	0.43 (0.09)	0.48 (0.09)	0.00909642	0.262909	Yes
cg11283404	8	IKBKB	0.86 (0.02)	0.86 (0.02)	0.85 (0.02)	0.00914624	0.263259	Yes
cg15409004	10	CTBP2	0.08 (0.01)	0.08 (0.01)	0.09 (0.01)	0.00915185	0.263259	No
cg06513247	17	2009-09-01	0.55 (0.04)	0.55 (0.04)	0.54 (0.04)	0.009158	0.263259	No
cg02816525	15	ADAM10	0.86 (0.02)	0.86 (0.02)	0.87 (0.02)	0.00916637	0.263259	Yes
cg19730887	3	NR2C2	0.8 (0.03)	0.8 (0.03)	0.79 (0.02)	0.00920761	0.263259	Yes
cg02835462	1	MAST2	0.74 (0.03)	0.73 (0.03)	0.75 (0.03)	0.00921073	0.263259	Yes
cg13185177	3	GP5	0.54 (0.05)	0.54 (0.06)	0.57 (0.06)	0.00922845	0.263259	No
cg27110548	11	NAA40	0.35 (0.04)	0.34 (0.04)	0.34 (0.04)	0.00923189	0.263259	Yes
cg09776718	19	PLEKHF1	0.92 (0.02)	0.92 (0.02)	0.93 (0.02)	0.00925713	0.263259	Yes
cg09737019	5	ZNF354A	0.69 (0.05)	0.68 (0.05)	0.71 (0.05)	0.00927862	0.263259	Yes
cg04423209	2	SH2D6	0.77 (0.02)	0.77 (0.02)	0.77 (0.03)	0.00929692	0.263259	Yes
cg16926213	1		0.77 (0.06)	0.77 (0.06)	0.74 (0.06)	0.00930306	0.263259	Yes
cg14145074	7	ACTB	0.4 (0.04)	0.39 (0.04)	0.39 (0.03)	0.00931856	0.263259	No
cg18280057	8	MTSS1	0.88 (0.02)	0.87 (0.03)	0.86 (0.03)	0.00935474	0.263841	No
cg26062172	5	FAM81B	0.74 (0.03)	0.75 (0.03)	0.76 (0.02)	0.00937984	0.263851	Yes
cg21949830	17	SLC43A2	0.84 (0.03)	0.84 (0.03)	0.83 (0.03)	0.00938337	0.263851	No
cg21872782	17	HOXB3	0.8 (0.02)	0.8 (0.02)	0.79 (0.02)	0.00943317	0.264852	Yes
cg25385366	21	TMPRSS3	0.32 (0.03)	0.32 (0.03)	0.34 (0.03)	0.00946624	0.265382	Yes
cg01089751	22	APOBEC3B	0.06 (0.02)	0.06 (0.02)	0.06 (0.02)	0.0095122	0.265989	Yes
cg15778232	12	PHB2;EMG1	0.69 (0.04)	0.69 (0.04)	0.68 (0.04)	0.0095164	0.265989	Yes
cg02856420	7	CUX1	0.24 (0.04)	0.24 (0.04)	0.25 (0.04)	0.00955278	0.266312	No
cg13279811	3		0.17 (0.04)	0.17 (0.04)	0.15 (0.04)	0.0095565	0.266312	Yes
cg27393726	10	C1QL3	0.87 (0.03)	0.86 (0.04)	0.86 (0.04)	0.00958765	0.266782	Yes
cg00095688	1	PRKCZ	0.81 (0.03)	0.8 (0.03)	0.8 (0.03)	0.00969497	0.269064	No
cg02852959	12	NRIP2	0.73 (0.08)	0.7 (0.08)	0.74 (0.07)	0.00969848	0.269064	Yes
cg21090033	3	TM4SF19	0.83 (0.04)	0.84 (0.04)	0.83 (0.04)	0.00973042	0.269488	No
cg00665106	1		0.24 (0.04)	0.24 (0.03)	0.25 (0.03)	0.00975333	0.269488	Yes
cg09848445	10	RET	0.98 (0.01)	0.98 (0.01)	0.98 (0.01)	0.00976684	0.269488	Yes
cg20167216	7		0.28 (0.04)	0.28 (0.04)	0.3 (0.03)	0.00977494	0.269488	Yes
cg00151124	15		0.85 (0.02)	0.85 (0.02)	0.84 (0.03)	0.00978613	0.269488	Yes
cg04348250	3	MCM2	0.83 (0.02)	0.82 (0.02)	0.82 (0.02)	0.00980037	0.269488	Yes
cg08305533	22	SFI1	0.51 (0.05)	0.51 (0.04)	0.52 (0.03)	0.00982278	0.269656	No
cg17892169	17	TNFSF12;TNFSF12-TNFSF13	0.3 (0.03)	0.3 (0.03)	0.29 (0.03)	0.00983533	0.269656	Yes
cg10965178	1	TIE1	0.65 (0.03)	0.65 (0.03)	0.64 (0.03)	0.00989983	0.270629	No
cg08445550	5	MYO10	0.84 (0.03)	0.84 (0.04)	0.82 (0.03)	0.00994152	0.270962	No
cg26084700	2		0.71 (0.03)	0.7 (0.03)	0.69 (0.03)	0.0099416	0.270962	Yes
cg19372602	1		0.52 (0.06)	0.51 (0.05)	0.5 (0.05)	0.0099562	0.270962	Yes
cg04794662	3	FOXP1	0.54 (0.06)	0.53 (0.06)	0.51 (0.05)	0.00997007	0.270962	No
cg12363682	5	GRM6	0.25 (0.06)	0.25 (0.06)	0.27 (0.06)	0.0100106	0.271326	Yes
cg14074174	19	SNAPC2	0.41 (0.03)	0.42 (0.03)	0.4 (0.03)	0.0100125	0.271326	No
cg11998932	7	SDK1	0.68 (0.05)	0.66 (0.06)	0.67 (0.05)	0.0100314	0.27136	Yes
cg05173758	13	GPR12	0.11 (0.01)	0.1 (0.01)	0.11 (0.02)	0.0100779	0.27136	Yes
cg26242531	14	ZFYVE21	0.41 (0.04)	0.41 (0.04)	0.42 (0.04)	0.0100897	0.27136	No
cg20514973	8		0.81 (0.02)	0.81 (0.02)	0.81 (0.02)	0.0100924	0.27136	Yes
cg02358653	2	MCM6	0.67 (0.04)	0.66 (0.04)	0.66 (0.03)	0.0100969	0.27136	Yes
cg02711608	19	SLC1A5	0.21 (0.03)	0.2 (0.03)	0.19 (0.03)	0.0101129	0.27136	No
cg19668034	12	GLIPR1	0.89 (0.04)	0.89 (0.04)	0.87 (0.04)	0.0101155	0.27136	Yes
cg02695062	6	DDR1	0.87 (0.02)	0.87 (0.02)	0.86 (0.02)	0.0101308	0.271379	No
cg01481251	11		0.88 (0.03)	0.88 (0.03)	0.87 (0.03)	0.0102105	0.272637	Yes
cg09587957	15	BMF	0.3 (0.03)	0.3 (0.03)	0.29 (0.03)	0.0102127	0.272637	Yes
cg24639100	12	DNAJC14	0.86 (0.02)	0.86 (0.02)	0.86 (0.02)	0.0102215	0.272637	Yes
cg15391651	1		0.43 (0.06)	0.43 (0.06)	0.46 (0.05)	0.0102428	0.272816	Yes
cg06532880	5	PRELID1;RAB24	0.22 (0.04)	0.21 (0.04)	0.21 (0.03)	0.0102705	0.272976	No
cg27137389	10		0.14 (0.03)	0.14 (0.03)	0.13 (0.03)	0.0102909	0.272976	Yes
cg20267775	1		0.85 (0.02)	0.85 (0.02)	0.84 (0.02)	0.0102927	0.272976	Yes
cg11683364	1	LGR6	0.46 (0.06)	0.45 (0.05)	0.44 (0.05)	0.0103246	0.273325	Yes
cg07734975	11		0.63 (0.08)	0.61 (0.08)	0.6 (0.08)	0.0103384	0.273325	Yes
cg15113803	3	RHO	0.85 (0.02)	0.85 (0.03)	0.84 (0.02)	0.0103498	0.273325	Yes
cg06896207	19	MOBKL2A	0.32 (0.05)	0.32 (0.05)	0.3 (0.04)	0.0103647	0.273332	No
cg06106428	11	ARHGAP20	0.57 (0.05)	0.57 (0.05)	0.59 (0.05)	0.0103833	0.273436	No
cg06099703	16	AMDHD2;ATP6V0C	0.89 (0.02)	0.89 (0.02)	0.89 (0.02)	0.0104025	0.273557	No
cg01385679	20	ELMO2	0.64 (0.03)	0.63 (0.03)	0.62 (0.03)	0.0104544	0.2744	Yes
cg21230425	7		0.59 (0.05)	0.6 (0.05)	0.58 (0.04)	0.01048	0.2744	Yes
cg27162705	10	TCF7L2	0.53 (0.06)	0.53 (0.06)	0.51 (0.05)	0.0104811	0.2744	No
cg13708645	12	KDM2B	0.5 (0.05)	0.5 (0.05)	0.48 (0.04)	0.0105069	0.2744	No
cg19325791	17		0.65 (0.05)	0.64 (0.05)	0.66 (0.04)	0.0105081	0.2744	No
cg08592890	16	CTF1	0.89 (0.02)	0.89 (0.02)	0.89 (0.02)	0.0105652	0.27545	Yes
cg02190636	19	CDC34	0.89 (0.02)	0.88 (0.02)	0.89 (0.02)	0.010592	0.27545	Yes
cg24513684	1	SNAP47;JMJD4	0.28 (0.03)	0.27 (0.03)	0.27 (0.03)	0.0105925	0.27545	Yes
cg12828729	5		0.54 (0.04)	0.54 (0.04)	0.56 (0.04)	0.0106368	0.276198	Yes
cg16081388	17		0.64 (0.02)	0.64 (0.02)	0.65 (0.02)	0.0106666	0.276198	Yes
cg15691862	1	FOXD2	0.37 (0.05)	0.36 (0.05)	0.37 (0.04)	0.0106805	0.276198	Yes
cg21436456	3	ZNF385D	0.1 (0.04)	0.1 (0.04)	0.09 (0.03)	0.0106995	0.276306	No
cg26864395	1	RUNX3	0.54 (0.03)	0.54 (0.02)	0.54 (0.02)	0.0107894	0.277364	No
cg24287110	10	KLF6	0.51 (0.06)	0.5 (0.06)	0.49 (0.06)	0.010802	0.277364	No
cg04524040	19	CREB3L3	0.48 (0.04)	0.47 (0.04)	0.48 (0.04)	0.0108165	0.277364	Yes
cg26859016	1	IKBKE	0.79 (0.04)	0.79 (0.04)	0.78 (0.04)	0.0108199	0.277364	Yes
cg24590353	6	UST	0.74 (0.03)	0.73 (0.03)	0.75 (0.02)	0.0108296	0.277364	Yes
cg24381155	10	BTRC	0.62 (0.04)	0.61 (0.04)	0.63 (0.04)	0.0108699	0.277872	Yes
cg00475085	11	PRPF19	0.11 (0.02)	0.11 (0.02)	0.1 (0.02)	0.0108792	0.277872	Yes
cg04983349	6	SH3BGRL2	0.56 (0.06)	0.56 (0.06)	0.59 (0.05)	0.0109354	0.278684	Yes
cg25985643	17	RPTOR	0.9 (0.03)	0.91 (0.02)	0.91 (0.02)	0.0109408	0.278684	No
cg20173170	6	TCF19;CCHCR1	0.21 (0.04)	0.21 (0.04)	0.2 (0.03)	0.010959	0.278767	Yes
cg03100906	16	COTL1	0.89 (0.02)	0.89 (0.02)	0.88 (0.02)	0.0109863	0.279082	No
cg03139840	8		0.13 (0.03)	0.13 (0.02)	0.12 (0.02)	0.0110069	0.279225	Yes
cg03004371	15	ALDH1A3	0.21 (0.04)	0.21 (0.04)	0.23 (0.04)	0.0111045	0.280109	Yes
cg06946797	16		0.26 (0.05)	0.26 (0.05)	0.24 (0.04)	0.011106	0.280109	Yes
cg14254562	9	TLE1	0.92 (0.01)	0.92 (0.02)	0.92 (0.01)	0.0111176	0.280109	Yes
cg04307297	17	TBKBP1	0.94 (0.01)	0.94 (0.01)	0.95 (0.01)	0.01112	0.280109	Yes
cg07127410	22	ZNRF3	0.61 (0.05)	0.6 (0.05)	0.63 (0.05)	0.0111318	0.280109	No
cg22876908	12	DGKA	0.38 (0.03)	0.38 (0.03)	0.38 (0.03)	0.0111529	0.280264	No
cg21860825	12	PLEKHA5	0.77 (0.04)	0.76 (0.04)	0.78 (0.03)	0.0111791	0.280544	Yes
cg09387914	6	ELOVL5	0.59 (0.04)	0.58 (0.03)	0.59 (0.03)	0.0112141	0.280722	Yes
cg01111358	18	ONECUT2	0.06 (0.02)	0.05 (0.02)	0.06 (0.02)	0.011243	0.280722	Yes
cg18633230	7	PRKAG2	0.83 (0.03)	0.83 (0.03)	0.82 (0.03)	0.0112463	0.280722	Yes
cg00073460	6	ZC3H12D	0.56 (0.06)	0.57 (0.06)	0.54 (0.06)	0.0112463	0.280722	No
cg09762515	7	CUX1	0.69 (0.04)	0.68 (0.03)	0.7 (0.04)	0.0113382	0.282304	No
cg17813891	14	EVL	0.71 (0.05)	0.7 (0.06)	0.7 (0.05)	0.0113404	0.282304	Yes
cg00772091	10	BUB3	0.51 (0.04)	0.5 (0.04)	0.49 (0.04)	0.0113698	0.282304	Yes
cg22994830	7	PRKAR1B	0.28 (0.04)	0.28 (0.04)	0.29 (0.04)	0.0113702	0.282304	No
cg06830167	1	CAMTA1	0.21 (0.03)	0.2 (0.03)	0.2 (0.03)	0.0114316	0.283452	Yes
cg19039843	5	AHRR;LOC100310782	0.9 (0.01)	0.9 (0.01)	0.9 (0.01)	0.0115534	0.284717	No
cg22586569	7	FBXL18	0.81 (0.04)	0.8 (0.03)	0.79 (0.04)	0.0115737	0.284717	Yes
cg16071219	13	LPAR6;RB1	0.51 (0.05)	0.49 (0.06)	0.49 (0.05)	0.0115841	0.284717	No
cg13523236	12		0.88 (0.02)	0.87 (0.02)	0.89 (0.02)	0.0116047	0.284717	Yes
cg26332488	1	SKI	0.88 (0.03)	0.87 (0.03)	0.89 (0.03)	0.0116077	0.284717	No
cg01676795	7	POR	0.59 (0.06)	0.58 (0.06)	0.59 (0.05)	0.0116139	0.284717	No
cg09635954	7	PRR15	0.62 (0.05)	0.61 (0.06)	0.6 (0.05)	0.0116268	0.284717	No
cg13209762	1		0.25 (0.03)	0.24 (0.04)	0.25 (0.04)	0.01163	0.284717	Yes
cg13594903	9	STOML2	0.14 (0.02)	0.13 (0.02)	0.12 (0.02)	0.0116351	0.284717	Yes
cg19291696	13		0.85 (0.04)	0.86 (0.04)	0.85 (0.03)	0.0116668	0.284918	Yes
cg00542975	2	CLASP1	0.48 (0.03)	0.48 (0.03)	0.47 (0.02)	0.0116738	0.284918	Yes
cg10216414	2	C2orf29	0.36 (0.04)	0.36 (0.04)	0.35 (0.05)	0.0117112	0.285456	Yes
cg09373227	11	ORAOV1	0.9 (0.01)	0.9 (0.01)	0.9 (0.01)	0.0117778	0.286707	Yes
cg22549408	18	PMAIP1	0.54 (0.07)	0.52 (0.07)	0.51 (0.06)	0.0118038	0.286791	No
cg12963656	3	LOC152225	0.33 (0.07)	0.33 (0.07)	0.35 (0.06)	0.011812	0.286791	Yes
cg27614723	15	SLCO3A1	0.56 (0.04)	0.56 (0.04)	0.54 (0.03)	0.011872	0.287444	Yes
cg12873476	8		0.65 (0.04)	0.64 (0.05)	0.64 (0.04)	0.0118727	0.287444	No
cg16255816	17	HAP1	0.37 (0.03)	0.37 (0.03)	0.35 (0.03)	0.0118851	0.287444	No
cg03222009	2	HS6ST1	0.75 (0.05)	0.75 (0.05)	0.73 (0.05)	0.0119157	0.287791	Yes
cg26751513	16	TELO2	0.68 (0.03)	0.68 (0.03)	0.66 (0.03)	0.0119303	0.287791	Yes
cg01268824	19	ZNF154	0.2 (0.05)	0.18 (0.05)	0.17 (0.05)	0.0119531	0.28797	Yes
cg06670463	4	UBE2D3	0.15 (0.04)	0.14 (0.04)	0.14 (0.05)	0.0119747	0.288119	Yes
cg23087153	14		0.84 (0.05)	0.83 (0.05)	0.82 (0.06)	0.0120331	0.288725	Yes
cg16008966	1		0.57 (0.03)	0.57 (0.03)	0.59 (0.03)	0.0120422	0.288725	Yes
cg24376434	1	PRRX1	0.32 (0.03)	0.31 (0.03)	0.31 (0.04)	0.0120498	0.288725	Yes
cg07696006	15	CCDC33	0.22 (0.03)	0.22 (0.03)	0.22 (0.04)	0.0120618	0.288725	Yes
cg01274122	8	MFHAS1	0.55 (0.06)	0.53 (0.06)	0.51 (0.05)	0.0121122	0.289047	No
cg22748407	17	USP22	0.45 (0.04)	0.44 (0.04)	0.43 (0.04)	0.0121244	0.289047	Yes
cg11354105	2	DNMT3A	0.89 (0.02)	0.89 (0.02)	0.89 (0.02)	0.0121388	0.289047	Yes
cg09920522	14	TRMT5;SLC38A6	0.07 (0.02)	0.07 (0.02)	0.06 (0.01)	0.0121528	0.289047	Yes
cg05506292	15	AKAP13	0.52 (0.02)	0.52 (0.02)	0.51 (0.02)	0.0122031	0.289047	Yes
cg05157625	14	RIN3	0.77 (0.08)	0.78 (0.08)	0.74 (0.07)	0.0122351	0.289047	No
cg02477579	19	SIN3B	0.07 (0.02)	0.07 (0.02)	0.06 (0.02)	0.0122424	0.289047	No
cg11028075	10	SORBS1	0.64 (0.05)	0.64 (0.05)	0.66 (0.05)	0.012258	0.289047	No
cg17164905	1	AHDC1	0.91 (0.02)	0.9 (0.02)	0.9 (0.02)	0.0122662	0.289047	No
cg13630574	20	VPS16;PTPRA	0.87 (0.02)	0.86 (0.02)	0.87 (0.02)	0.012271	0.289047	Yes
cg03032677	6	CDKN1A	0.84 (0.03)	0.84 (0.03)	0.83 (0.03)	0.0122765	0.289047	No
cg24280832	10	C10orf11	0.85 (0.04)	0.84 (0.05)	0.83 (0.04)	0.0123137	0.28923	Yes
cg20485758	6	HFE	0.87 (0.02)	0.86 (0.02)	0.86 (0.02)	0.0123153	0.28923	Yes
cg10471113	16	IFT140;TMEM204	0.62 (0.08)	0.61 (0.07)	0.64 (0.07)	0.0123662	0.290063	Yes
cg07533239	12	PLEKHG6	0.67 (0.04)	0.66 (0.04)	0.66 (0.04)	0.0124201	0.290818	Yes
cg22158051	5		0.2 (0.03)	0.2 (0.03)	0.21 (0.03)	0.0124338	0.290818	Yes
cg21747070	5		0.46 (0.04)	0.45 (0.04)	0.45 (0.04)	0.0124587	0.290818	No
cg21593835	3	MYLK	0.46 (0.04)	0.46 (0.04)	0.46 (0.04)	0.0124763	0.290818	No
cg15891850	13	KLF12	0.79 (0.03)	0.79 (0.02)	0.8 (0.02)	0.0125001	0.291009	Yes
cg15644324	1	HIVEP3	0.66 (0.1)	0.64 (0.1)	0.69 (0.08)	0.0126097	0.291999	No
cg15125438	12	TPCN1	0.76 (0.03)	0.75 (0.03)	0.75 (0.03)	0.012638	0.291999	No
cg18160072	5	GHR	0.17 (0.02)	0.16 (0.02)	0.17 (0.02)	0.0126438	0.291999	Yes
cg13385220	1	LGR6	0.69 (0.04)	0.68 (0.05)	0.67 (0.05)	0.0126525	0.291999	Yes
cg23835453	12	MFSD5	0.93 (0.01)	0.93 (0.01)	0.92 (0.01)	0.0126565	0.291999	Yes
cg13937905	12	RARG	0.86 (0.04)	0.85 (0.04)	0.85 (0.04)	0.0126647	0.291999	No
cg26703507	2	SLC20A1	0.56 (0.05)	0.55 (0.06)	0.55 (0.06)	0.0126786	0.291999	No
cg06432479	1	TAL1	0.06 (0.01)	0.06 (0.01)	0.06 (0.01)	0.0126859	0.291999	Yes
cg14796406	7	SEMA3C	0.28 (0.06)	0.27 (0.06)	0.25 (0.05)	0.0126951	0.291999	No
cg07752613	8	EIF2C2	0.66 (0.04)	0.65 (0.04)	0.66 (0.04)	0.012699	0.291999	No
cg07342322	1		0.42 (0.04)	0.41 (0.04)	0.41 (0.05)	0.0127329	0.292417	Yes
cg13353574	8		0.44 (0.04)	0.43 (0.04)	0.43 (0.04)	0.0127755	0.292436	Yes
cg09307264	17	INCA1;KIF1C	0.56 (0.04)	0.55 (0.03)	0.54 (0.04)	0.0127833	0.292436	Yes
cg26599989	11	TOLLIP	0.57 (0.03)	0.57 (0.03)	0.59 (0.03)	0.01279	0.292436	No
cg13910681	9	FAM102A	0.16 (0.02)	0.15 (0.02)	0.15 (0.02)	0.0127963	0.292436	No
cg25727671	7	HOXA7	0.91 (0.02)	0.92 (0.03)	0.9 (0.02)	0.012838	0.293031	No
cg16498391	18	SLMO1	0.37 (0.05)	0.37 (0.05)	0.38 (0.05)	0.012895	0.293971	Yes
cg19022254	6	GABBR1	0.74 (0.05)	0.73 (0.05)	0.74 (0.05)	0.0130096	0.296223	Yes
cg07941108	14		0.61 (0.05)	0.6 (0.05)	0.6 (0.05)	0.0130747	0.297206	Yes
cg27252776	3	ITGB5	0.79 (0.04)	0.78 (0.04)	0.78 (0.04)	0.013095	0.297206	Yes
cg00931843	6	TIAM2	0.51 (0.06)	0.5 (0.06)	0.53 (0.06)	0.0131052	0.297206	No
cg08843623	16		0.63 (0.04)	0.62 (0.04)	0.64 (0.04)	0.0131165	0.297206	Yes
cg09453076	2	ARL4C	0.12 (0.02)	0.12 (0.02)	0.11 (0.02)	0.0131698	0.297486	Yes
cg06677021	5	SERINC5	0.56 (0.07)	0.55 (0.07)	0.52 (0.07)	0.0132119	0.297486	No
cg02399048	8	REEP4	0.6 (0.04)	0.6 (0.04)	0.58 (0.04)	0.0132159	0.297486	Yes
cg14899046	21		0.62 (0.03)	0.62 (0.03)	0.61 (0.03)	0.0132168	0.297486	Yes
cg15493618	4		0.21 (0.04)	0.2 (0.03)	0.22 (0.04)	0.0132232	0.297486	Yes
cg26283713	7		0.84 (0.02)	0.83 (0.02)	0.84 (0.02)	0.0132314	0.297486	Yes
cg21120249	9	C9orf139;ABCA2	0.66 (0.04)	0.65 (0.04)	0.65 (0.03)	0.0132404	0.297486	Yes
cg18669588	3	TWF2	0.83 (0.03)	0.83 (0.03)	0.82 (0.03)	0.0132606	0.297582	No
cg26055950	1	TP73	0.49 (0.05)	0.48 (0.06)	0.47 (0.05)	0.0133085	0.298032	Yes
cg12111137	17	TBCD	0.85 (0.04)	0.85 (0.04)	0.86 (0.03)	0.0133285	0.298032	No
cg16450677	2		0.59 (0.07)	0.58 (0.08)	0.56 (0.06)	0.0133614	0.298409	Yes
cg16659510	16	BANP	0.88 (0.02)	0.87 (0.03)	0.87 (0.03)	0.0134049	0.299024	Yes
cg12603632	13		0.69 (0.06)	0.67 (0.07)	0.66 (0.05)	0.01345	0.29954	Yes
cg05308656	2	ARL4C	0.47 (0.05)	0.45 (0.06)	0.45 (0.05)	0.0134601	0.29954	Yes
cg08130275	3	FNDC3B	0.51 (0.07)	0.51 (0.06)	0.48 (0.07)	0.0135142	0.299834	Yes
cg13741304	9	ARRDC1	0.62 (0.05)	0.61 (0.05)	0.61 (0.04)	0.0135281	0.299834	Yes
cg01207684	16	ADCY9	0.75 (0.05)	0.74 (0.05)	0.72 (0.05)	0.0135356	0.299834	No
cg13392258	17		0.58 (0.06)	0.56 (0.06)	0.55 (0.06)	0.0135376	0.299834	Yes
cg03068497	7	GARS	0.46 (0.07)	0.46 (0.07)	0.43 (0.06)	0.0135721	0.300085	Yes
cg21418854	1	C1orf113	0.85 (0.02)	0.84 (0.02)	0.84 (0.02)	0.013581	0.300085	No
cg27664496	12	DTX1	0.41 (0.05)	0.41 (0.05)	0.43 (0.04)	0.0136033	0.30022	Yes
cg17471939	1	TP73	0.47 (0.08)	0.45 (0.09)	0.44 (0.08)	0.0137111	0.301775	Yes
cg20289911	20	FAM110A	0.55 (0.03)	0.55 (0.03)	0.54 (0.03)	0.0137222	0.301775	Yes
cg07269053	10	VTI1A	0.83 (0.04)	0.84 (0.03)	0.82 (0.03)	0.0137493	0.302015	Yes
cg13011388	14	EFS	0.1 (0.04)	0.1 (0.04)	0.11 (0.04)	0.0137833	0.302407	Yes
cg05438378	15	SMAD3	0.29 (0.05)	0.29 (0.04)	0.27 (0.05)	0.0138174	0.302799	Yes
cg26486069	X	RBM3	0.73 (0.04)	0.73 (0.04)	0.71 (0.03)	0.0138381	0.302897	Yes
cg26719625	17	TRPV2	0.59 (0.04)	0.59 (0.03)	0.58 (0.03)	0.0139212	0.304167	Yes
cg10798764	6	NFKBIL1;ATP6V1G2	0.22 (0.02)	0.22 (0.02)	0.22 (0.02)	0.0139342	0.304167	Yes
cg09155905	17	FNDC8;RAD51L3	0.26 (0.03)	0.26 (0.03)	0.25 (0.03)	0.0139733	0.304167	Yes
cg01560871	10	C10orf27	0.74 (0.03)	0.74 (0.03)	0.75 (0.04)	0.0139962	0.304167	Yes
cg01595951	5		0.59 (0.05)	0.59 (0.06)	0.61 (0.05)	0.0140069	0.304167	Yes
cg05460226	17	PIK3R5	0.52 (0.06)	0.51 (0.06)	0.49 (0.05)	0.0140178	0.304167	No
cg18704527	22	ARVCF	0.36 (0.05)	0.37 (0.05)	0.39 (0.05)	0.0140265	0.304167	No
cg03542031	1	SNHG12;SNORD99	0.69 (0.03)	0.69 (0.03)	0.68 (0.03)	0.01412	0.305473	Yes
cg25791620	17		0.9 (0.01)	0.9 (0.01)	0.9 (0.01)	0.0141509	0.305473	Yes
cg24972288	11	ST5	0.07 (0.01)	0.07 (0.01)	0.08 (0.01)	0.0141531	0.305473	Yes
cg25537119	5	MYO10	0.89 (0.02)	0.89 (0.02)	0.89 (0.03)	0.0141557	0.305473	No
cg21393124	17		0.75 (0.03)	0.74 (0.03)	0.74 (0.03)	0.0141752	0.305473	Yes
cg16651552	5	SLC9A3	0.4 (0.03)	0.4 (0.03)	0.41 (0.03)	0.0141992	0.305473	Yes
cg18828619	14	PELI2	0.67 (0.04)	0.66 (0.04)	0.65 (0.04)	0.0142012	0.305473	No
cg04667538	2		0.78 (0.05)	0.78 (0.05)	0.81 (0.04)	0.0142461	0.306086	Yes
cg08288223	11	SHANK2	0.36 (0.05)	0.35 (0.05)	0.37 (0.04)	0.014292	0.306405	Yes
cg02872476	16	DBNDD1	0.94 (0.01)	0.94 (0.01)	0.94 (0.01)	0.0143077	0.306405	Yes
cg14014731	9	RPS6	0.34 (0.06)	0.34 (0.05)	0.32 (0.05)	0.0143102	0.306405	No
cg17971578	1	STK40	0.3 (0.04)	0.3 (0.04)	0.29 (0.04)	0.0143758	0.307036	No
cg12549345	19	THOP1	0.85 (0.03)	0.85 (0.03)	0.84 (0.02)	0.0143823	0.307036	Yes
cg07478007	1	ATAD3B	0.34 (0.03)	0.34 (0.03)	0.35 (0.03)	0.014404	0.307036	Yes
cg22040039	12		0.75 (0.03)	0.74 (0.03)	0.75 (0.03)	0.0144054	0.307036	Yes
cg04329146	3	CCR4	0.92 (0.02)	0.92 (0.01)	0.91 (0.02)	0.0144426	0.307479	Yes
cg24046474	9	RPL12;LRSAM1	0.25 (0.05)	0.25 (0.05)	0.23 (0.05)	0.0145211	0.308353	Yes
cg13832201	17	MAPK7	0.74 (0.03)	0.74 (0.03)	0.73 (0.03)	0.0145318	0.308353	No
cg07683388	2	ANKRD44	0.65 (0.04)	0.64 (0.04)	0.63 (0.03)	0.0145494	0.308353	Yes
cg13689560	19	C19orf36;MOBKL2A	0.1 (0.03)	0.09 (0.03)	0.08 (0.03)	0.0145498	0.308353	No
cg06736444	16	LOC100128788;SRRM2	0.8 (0.03)	0.79 (0.03)	0.79 (0.03)	0.0145797	0.308418	No
cg07421287	1	KCNA3	0.56 (0.04)	0.55 (0.05)	0.54 (0.04)	0.0145859	0.308418	No
cg08250742	17		0.89 (0.02)	0.88 (0.02)	0.89 (0.02)	0.01463	0.308898	Yes
cg25512107	17	RPTOR	0.99 (0.01)	0.99 (0.01)	0.99 (0.01)	0.0146456	0.308898	No
cg08689929	19	EGLN2	0.75 (0.02)	0.74 (0.02)	0.74 (0.02)	0.0146593	0.308898	Yes
cg13072940	3	MON1A	0.36 (0.03)	0.37 (0.03)	0.35 (0.03)	0.0146759	0.308898	Yes
cg24226238	11	GRIK4	0.83 (0.02)	0.82 (0.02)	0.83 (0.02)	0.0147469	0.309215	Yes
cg09405076	11	SHANK2	0.8 (0.03)	0.79 (0.03)	0.81 (0.03)	0.0147553	0.309215	Yes
cg03833097	5		0.89 (0.01)	0.89 (0.01)	0.89 (0.01)	0.0148125	0.309434	Yes
cg11714502	9	AK1	0.61 (0.04)	0.6 (0.04)	0.6 (0.04)	0.0148162	0.309434	Yes
cg01948094	16	PLEKHG4	0.9 (0.01)	0.9 (0.01)	0.89 (0.02)	0.014838	0.309543	Yes
cg11376147	11	SLC43A1	0.17 (0.02)	0.16 (0.02)	0.16 (0.02)	0.0148957	0.310252	Yes
cg09900893	1	RPS6KA1	0.5 (0.04)	0.51 (0.04)	0.49 (0.04)	0.0149075	0.310252	No
cg13493071	7	GNA12	0.84 (0.02)	0.84 (0.02)	0.83 (0.02)	0.0149224	0.310252	No
cg10380221	16	ZNF668	0.19 (0.03)	0.19 (0.03)	0.21 (0.04)	0.0149452	0.310252	No
cg03899721	8	MFHAS1	0.99 (0.01)	0.99 (0.01)	0.99 (0.01)	0.0149653	0.310252	No
cg02276944	2	GPD2	0.48 (0.04)	0.48 (0.04)	0.49 (0.04)	0.0149717	0.310252	No
cg09570614	2		0.49 (0.04)	0.49 (0.03)	0.51 (0.03)	0.0150291	0.311004	No
cg08763102	4	HTT	0.62 (0.03)	0.62 (0.03)	0.61 (0.02)	0.0150502	0.311004	No
cg02187196	20	PANK2	0.25 (0.07)	0.25 (0.07)	0.24 (0.07)	0.015058	0.311004	Yes
cg12891342	11	LPXN	0.89 (0.02)	0.89 (0.02)	0.88 (0.02)	0.0150779	0.311021	Yes
cg00055073	2		0.18 (0.03)	0.18 (0.03)	0.19 (0.03)	0.0150921	0.311021	Yes
cg12076915	19		0.73 (0.03)	0.72 (0.03)	0.71 (0.03)	0.0151396	0.311655	Yes
cg15013801	10	ASCC1;C10orf104	0.89 (0.03)	0.89 (0.03)	0.87 (0.03)	0.015194	0.312311	No
cg00911776	7	FLJ43663	0.77 (0.04)	0.76 (0.04)	0.76 (0.04)	0.0152096	0.312311	Yes
cg02064724	14	PNMA1	0.09 (0.02)	0.09 (0.02)	0.08 (0.02)	0.0152325	0.312311	Yes
cg03482883	16	MAPK8IP3	0.77 (0.03)	0.76 (0.03)	0.77 (0.02)	0.0152674	0.312311	Yes
cg11127915	19	NFIX	0.29 (0.06)	0.28 (0.06)	0.26 (0.04)	0.0152711	0.312311	Yes
cg04010868	16	ZC3H7A	0.74 (0.02)	0.74 (0.02)	0.74 (0.02)	0.0152744	0.312311	Yes
cg22304262	19	SLC1A5	0.8 (0.04)	0.8 (0.04)	0.78 (0.04)	0.0153102	0.312311	No
cg00461022	5	FAM134B	0.7 (0.05)	0.7 (0.05)	0.72 (0.04)	0.0153179	0.312311	Yes
cg02940661	14	KIAA0125	0.6 (0.06)	0.61 (0.06)	0.58 (0.05)	0.0153319	0.312311	Yes
cg01015663	1	TCEA3	0.47 (0.05)	0.47 (0.05)	0.46 (0.05)	0.0153387	0.312311	Yes
cg08362785	22	MKL1	0.61 (0.03)	0.6 (0.03)	0.61 (0.03)	0.0154314	0.313501	Yes
cg00152644	1	SPRR2E	0.74 (0.03)	0.75 (0.03)	0.75 (0.03)	0.0154475	0.313501	Yes
cg26849931	5	HDAC3	0.28 (0.02)	0.27 (0.02)	0.27 (0.02)	0.0154893	0.314008	Yes
cg16518861	14	NFKBIA	0.41 (0.07)	0.4 (0.07)	0.4 (0.07)	0.0155523	0.314942	No
cg13929988	4	KLHL8	0.37 (0.04)	0.37 (0.04)	0.36 (0.04)	0.0156053	0.314973	Yes
cg17406383	17		0.3 (0.04)	0.3 (0.04)	0.31 (0.03)	0.0156546	0.314973	Yes
cg09296270	2		0.23 (0.04)	0.22 (0.04)	0.24 (0.04)	0.0156558	0.314973	Yes
cg02064237	5	ZFP2	0.13 (0.03)	0.13 (0.03)	0.14 (0.03)	0.0156731	0.314973	Yes
cg27178772	6	PNRC1	0.85 (0.02)	0.84 (0.02)	0.85 (0.02)	0.0156839	0.314973	Yes
cg05207227	22	GAS2L1	0.08 (0.02)	0.08 (0.02)	0.08 (0.02)	0.0156898	0.314973	Yes
cg14886849	14	TRAF3	0.6 (0.07)	0.59 (0.07)	0.63 (0.07)	0.0156958	0.314973	Yes
cg24057642	19	NR2F6	0.29 (0.04)	0.28 (0.04)	0.29 (0.03)	0.015718	0.314973	No
cg18992688	1	AVPR1B	0.13 (0.04)	0.12 (0.04)	0.12 (0.03)	0.0157646	0.314973	No
cg24304617	1	ATP1B1	0.21 (0.04)	0.2 (0.04)	0.22 (0.05)	0.0157817	0.314973	No
cg01741041	7	ACTB	0.31 (0.03)	0.31 (0.03)	0.31 (0.03)	0.015831	0.314973	No
cg15512289	1		0.67 (0.05)	0.67 (0.05)	0.65 (0.05)	0.015866	0.314973	Yes
cg05971521	20		0.56 (0.03)	0.56 (0.03)	0.56 (0.03)	0.0158714	0.314973	Yes
cg10317380	11	HSPA8	0.07 (0.01)	0.07 (0.01)	0.06 (0.01)	0.0158832	0.314973	Yes
cg26568226	15	CYFIP1	0.87 (0.03)	0.87 (0.03)	0.86 (0.03)	0.0158968	0.314973	Yes
cg00792107	12		0.29 (0.04)	0.28 (0.04)	0.3 (0.03)	0.0159225	0.314973	Yes
cg10812236	2	PLEK	0.21 (0.04)	0.22 (0.04)	0.22 (0.04)	0.0159238	0.314973	No
cg09226275	3	TBL1XR1	0.89 (0.02)	0.89 (0.02)	0.89 (0.02)	0.0159267	0.314973	Yes
cg00350448	11	ARAP1	0.23 (0.02)	0.22 (0.02)	0.22 (0.02)	0.0159412	0.314973	Yes
cg01300096	6	CUTA	0.65 (0.04)	0.64 (0.04)	0.64 (0.03)	0.0159541	0.314973	No
cg10426318	6	KIAA1949	0.54 (0.05)	0.53 (0.05)	0.52 (0.04)	0.0159587	0.314973	No
cg06394460	13	LNX2	0.73 (0.06)	0.73 (0.06)	0.7 (0.06)	0.0159855	0.315169	Yes
cg01496720	10	KLF6	0.28 (0.05)	0.27 (0.05)	0.26 (0.05)	0.016047	0.315932	No
cg04907244	7	SNORD93	0.17 (0.04)	0.18 (0.04)	0.15 (0.03)	0.0160607	0.315932	No
cg18158306	12	FBRSL1	0.49 (0.04)	0.48 (0.04)	0.49 (0.04)	0.016075	0.315932	Yes
cg03120475	10	FAM171A1	0.41 (0.03)	0.41 (0.03)	0.42 (0.03)	0.0161328	0.316297	Yes
cg16000022	11	TPCN2	0.3 (0.03)	0.31 (0.03)	0.32 (0.03)	0.0161339	0.316297	Yes
cg17249268	18	C18orf45	0.81 (0.04)	0.81 (0.03)	0.8 (0.04)	0.0161444	0.316297	Yes
cg13926338	1	SORT1	0.26 (0.05)	0.27 (0.05)	0.27 (0.05)	0.0162199	0.31726	No
cg13998945	7		0.84 (0.02)	0.84 (0.02)	0.83 (0.02)	0.0162329	0.31726	Yes
cg14159342	1	TP73	0.47 (0.05)	0.46 (0.05)	0.44 (0.06)	0.016289	0.317537	Yes
cg20098659	12	CLEC9A	0.7 (0.06)	0.69 (0.06)	0.71 (0.06)	0.0162927	0.317537	Yes
cg15775914	1	CHML;OPN3	0.66 (0.03)	0.65 (0.03)	0.67 (0.03)	0.0163128	0.317598	Yes
cg03962527	10	ADD3	0.77 (0.05)	0.75 (0.06)	0.76 (0.06)	0.0163318	0.317637	Yes
cg22261987	8		0.78 (0.05)	0.76 (0.05)	0.79 (0.04)	0.0163816	0.318055	Yes
cg11430077	10	GATA3	0.12 (0.03)	0.12 (0.04)	0.11 (0.03)	0.0163939	0.318055	No
cg07286341	5	PDLIM7	0.34 (0.04)	0.33 (0.04)	0.33 (0.03)	0.0164044	0.318055	Yes
cg26185061	10		0.76 (0.03)	0.76 (0.03)	0.75 (0.03)	0.016438	0.318281	Yes
cg18390495	20	DEFB132	0.17 (0.03)	0.18 (0.03)	0.18 (0.03)	0.0164748	0.318281	Yes
cg03773862	7	ELMO1	0.88 (0.02)	0.89 (0.02)	0.88 (0.02)	0.0164889	0.318281	No
cg11256607	1	DAB1	0.22 (0.03)	0.22 (0.02)	0.22 (0.03)	0.0164955	0.318281	Yes
cg05875421	14	GPR68	0.16 (0.03)	0.16 (0.03)	0.14 (0.02)	0.0165103	0.318281	No
cg00340102	20	ERGIC3	0.26 (0.05)	0.25 (0.04)	0.26 (0.04)	0.0165584	0.318281	Yes
cg23966795	2	TANC1	0.88 (0.02)	0.87 (0.02)	0.89 (0.02)	0.0165734	0.318281	Yes
cg21329649	7	MAD1L1	0.9 (0.02)	0.9 (0.02)	0.89 (0.02)	0.0165912	0.318281	No
cg26756208	10		0.07 (0.01)	0.08 (0.02)	0.08 (0.01)	0.0166203	0.318281	Yes
cg22517995	19	ZNF382;ZNF529	0.16 (0.02)	0.16 (0.02)	0.15 (0.02)	0.0166206	0.318281	No
cg15138339	17	COASY	0.86 (0.03)	0.86 (0.03)	0.85 (0.03)	0.0167134	0.319729	Yes
cg23594345	14		0.59 (0.09)	0.59 (0.08)	0.56 (0.07)	0.0167449	0.320003	Yes
cg05619598	19		0.45 (0.04)	0.45 (0.04)	0.47 (0.04)	0.0168083	0.320888	Yes
cg00871610	21	MIR802	0.6 (0.04)	0.59 (0.04)	0.59 (0.04)	0.0168572	0.321382	No
cg14741228	12	FAM60A;FLJ13224	0.14 (0.03)	0.14 (0.03)	0.13 (0.03)	0.0168791	0.321382	Yes
cg20925954	10	DUSP5	0.56 (0.04)	0.55 (0.04)	0.54 (0.04)	0.0168859	0.321382	Yes
cg17298925	5		0.17 (0.08)	0.17 (0.08)	0.21 (0.08)	0.016936	0.321722	Yes
cg16119613	12		0.43 (0.04)	0.43 (0.04)	0.41 (0.05)	0.0169382	0.321722	Yes
cg14036069	9	NEK6	0.89 (0.02)	0.89 (0.02)	0.88 (0.02)	0.0169833	0.32193	Yes
cg08326410	19	KIR2DL4	0.92 (0.02)	0.92 (0.02)	0.93 (0.02)	0.0169836	0.32193	Yes
cg11656478	2	CYP1B1	0.47 (0.04)	0.47 (0.03)	0.49 (0.03)	0.0171071	0.323942	No
cg10827488	11	ZBTB16	0.22 (0.04)	0.21 (0.04)	0.22 (0.03)	0.017132	0.324085	No
cg18137450	1	WDR26	0.58 (0.04)	0.57 (0.04)	0.57 (0.03)	0.0171841	0.324625	Yes
cg20533952	21		0.19 (0.05)	0.19 (0.05)	0.21 (0.05)	0.0171954	0.324625	Yes
cg04986931	22		0.75 (0.02)	0.75 (0.03)	0.74 (0.02)	0.0172268	0.324859	Yes
cg24581650	5	ERGIC1	0.86 (0.03)	0.85 (0.03)	0.85 (0.03)	0.0172553	0.324859	No
cg03531211	6	HLA-DMA	0.59 (0.05)	0.59 (0.05)	0.57 (0.05)	0.0172599	0.324859	Yes
cg01437439	1	SPSB1	0.88 (0.02)	0.88 (0.02)	0.89 (0.02)	0.0173083	0.324888	Yes
cg04407215	3		0.24 (0.04)	0.24 (0.04)	0.24 (0.03)	0.0173164	0.324888	Yes
cg13672514	12	SETD8	0.54 (0.04)	0.53 (0.04)	0.52 (0.04)	0.0173255	0.324888	No
cg12043732	20	SLCO4A1	0.94 (0.01)	0.94 (0.01)	0.94 (0.01)	0.0174298	0.324888	Yes
cg00188055	6	TNXB	0.15 (0.04)	0.14 (0.03)	0.15 (0.03)	0.0174302	0.324888	No
cg07190012	11		0.12 (0.02)	0.12 (0.02)	0.12 (0.02)	0.0174488	0.324888	Yes
cg11465939	22	IGLL1	0.27 (0.04)	0.27 (0.04)	0.28 (0.04)	0.0174503	0.324888	Yes
cg03234777	11	AMICA1	0.15 (0.03)	0.14 (0.03)	0.14 (0.03)	0.0174646	0.324888	No
cg04040317	13	MCF2L	0.86 (0.02)	0.86 (0.02)	0.87 (0.02)	0.0174703	0.324888	No
cg06355422	22	C22orf34	0.88 (0.04)	0.87 (0.04)	0.88 (0.04)	0.0175093	0.324998	Yes
cg01568319	6	SMOC2	0.12 (0.03)	0.12 (0.03)	0.14 (0.03)	0.0175224	0.324998	No
cg02397552	13	CLN5	0.84 (0.02)	0.83 (0.02)	0.83 (0.02)	0.0175284	0.324998	Yes
cg08176694	12	PITPNM2	0.4 (0.04)	0.41 (0.04)	0.41 (0.04)	0.0175482	0.325043	Yes
cg07411111	20	TPD52L2	0.76 (0.03)	0.76 (0.03)	0.77 (0.03)	0.0176238	0.325879	No
cg12322877	17	ASPSCR1	0.69 (0.05)	0.68 (0.05)	0.68 (0.05)	0.0176283	0.325879	No
cg17292667	13		0.75 (0.03)	0.74 (0.03)	0.76 (0.03)	0.0176716	0.326356	Yes
cg11073255	6	VARS	0.11 (0.03)	0.1 (0.03)	0.1 (0.03)	0.017717	0.326717	No
cg11919694	16	TBC1D10B	0.18 (0.03)	0.17 (0.03)	0.17 (0.03)	0.0177414	0.326717	No
cg01763916	1	SMAP2	0.46 (0.06)	0.45 (0.06)	0.43 (0.06)	0.0177436	0.326717	No
cg17642041	3	CCR9	0.85 (0.02)	0.85 (0.02)	0.86 (0.02)	0.0177625	0.326742	Yes
cg22778120	22	PRR5	0.71 (0.06)	0.7 (0.06)	0.68 (0.06)	0.0178146	0.326954	Yes
cg23474890	12	BCL7A	0.76 (0.05)	0.76 (0.05)	0.78 (0.05)	0.0178392	0.326954	Yes
cg12474798	10	ADO	0.47 (0.06)	0.45 (0.06)	0.44 (0.06)	0.0178396	0.326954	No
cg04299274	17	KSR1	0.62 (0.03)	0.62 (0.03)	0.61 (0.03)	0.017844	0.326954	No
cg27133224	15	SCAMP2	0.16 (0.02)	0.15 (0.02)	0.15 (0.01)	0.017875	0.327199	Yes
cg04313565	16	XYLT1	0.51 (0.07)	0.5 (0.07)	0.49 (0.07)	0.0178952	0.327248	No
cg09735822	12		0.4 (0.03)	0.4 (0.03)	0.41 (0.03)	0.017924	0.327406	Yes
cg00752969	2		0.78 (0.05)	0.77 (0.05)	0.75 (0.05)	0.01797	0.327406	Yes
cg00350942	9	GRIN1	0.43 (0.05)	0.44 (0.05)	0.45 (0.07)	0.0179799	0.327406	Yes
cg23290456	19	KLF16	0.31 (0.01)	0.31 (0.01)	0.3 (0.01)	0.0179923	0.327406	Yes
cg26775087	3	SH3BP5	0.74 (0.03)	0.74 (0.03)	0.75 (0.02)	0.0180001	0.327406	Yes
cg09590147	13		0.8 (0.02)	0.8 (0.02)	0.81 (0.02)	0.0180253	0.327406	Yes
cg00403478	6	HLA-DPA1	0.24 (0.05)	0.23 (0.04)	0.24 (0.05)	0.0180426	0.327406	Yes
cg26262442	12	CLEC9A	0.68 (0.05)	0.67 (0.05)	0.69 (0.06)	0.018044	0.327406	Yes
cg04703696	9	GBGT1	0.42 (0.03)	0.41 (0.03)	0.4 (0.03)	0.0181098	0.32749	Yes
cg21473814	19	CRTC1	0.74 (0.05)	0.74 (0.04)	0.76 (0.04)	0.0181118	0.32749	No
cg00540464	19		0.88 (0.02)	0.88 (0.03)	0.88 (0.02)	0.0181176	0.32749	Yes
cg18449062	10	CNNM2	0.49 (0.03)	0.49 (0.03)	0.48 (0.04)	0.0181409	0.32749	Yes
cg04569233	3	CX3CR1	0.67 (0.05)	0.67 (0.04)	0.69 (0.04)	0.0181564	0.32749	No
cg01281718	6	SMAP1	0.79 (0.03)	0.78 (0.04)	0.79 (0.04)	0.0181602	0.32749	Yes
cg05971148	7	ACTB	0.14 (0.02)	0.14 (0.02)	0.14 (0.02)	0.0182025	0.32749	No
cg16702313	14	C14orf43	0.68 (0.02)	0.67 (0.02)	0.67 (0.02)	0.0182101	0.32749	No
cg14841514	10	ZMIZ1	0.85 (0.02)	0.84 (0.02)	0.84 (0.02)	0.0182632	0.32749	No
cg13131501	1	RBM8A	0.33 (0.03)	0.33 (0.03)	0.32 (0.03)	0.018269	0.32749	Yes
cg16717008	3		0.25 (0.06)	0.24 (0.06)	0.22 (0.06)	0.0183216	0.32749	Yes
cg03891319	3	ACY1	0.08 (0.01)	0.08 (0.01)	0.08 (0.01)	0.018325	0.32749	No
cg22103736	5	AHRR	0.15 (0.01)	0.15 (0.01)	0.15 (0.01)	0.0183298	0.32749	No
cg24134897	11	TSPAN4	0.71 (0.07)	0.72 (0.06)	0.73 (0.06)	0.018356	0.32749	Yes
cg16568360	16	TAOK2	0.44 (0.02)	0.43 (0.02)	0.43 (0.02)	0.0183589	0.32749	Yes
cg01970383	5	COL23A1	0.85 (0.02)	0.86 (0.03)	0.85 (0.02)	0.0183942	0.32749	No
cg18790325	12		0.16 (0.03)	0.16 (0.03)	0.17 (0.03)	0.018402	0.32749	Yes
cg02107842	5	MAST4	0.65 (0.05)	0.64 (0.05)	0.66 (0.05)	0.0184081	0.32749	Yes
cg11314684	1	AKT3	0.4 (0.03)	0.4 (0.03)	0.39 (0.03)	0.0184131	0.32749	No
cg20405697	6	NRM	0.87 (0.03)	0.87 (0.03)	0.87 (0.02)	0.0184208	0.32749	Yes
cg01088410	5		0.05 (0.01)	0.04 (0.01)	0.05 (0.01)	0.0184378	0.32749	Yes
cg03295554	11	ETS1	0.7 (0.05)	0.7 (0.06)	0.68 (0.06)	0.018462	0.32749	No
cg14292870	12	LAG3	0.88 (0.03)	0.87 (0.03)	0.86 (0.04)	0.0184847	0.32749	Yes
cg13021619	8	NKX2-6	0.09 (0.03)	0.08 (0.03)	0.09 (0.03)	0.0185027	0.32749	Yes
cg06791426	12	FBRSL1	0.33 (0.05)	0.32 (0.05)	0.34 (0.03)	0.0185029	0.32749	Yes
cg24530246	3		0.62 (0.05)	0.62 (0.06)	0.63 (0.05)	0.018507	0.32749	Yes
cg15651928	20	PXMP4	0.83 (0.02)	0.83 (0.02)	0.84 (0.03)	0.0185378	0.32749	Yes
cg07660283	22	RPL23AP82;RABL2B	0.78 (0.03)	0.79 (0.03)	0.77 (0.02)	0.0185546	0.32749	Yes
cg25421530	10	SORBS1	0.84 (0.03)	0.84 (0.03)	0.85 (0.03)	0.0185574	0.32749	No
cg15059065	19	NR2F6	0.86 (0.04)	0.86 (0.04)	0.84 (0.04)	0.01858	0.32758	No
cg17931529	19	MOBKL2A	0.83 (0.02)	0.83 (0.02)	0.82 (0.02)	0.0187703	0.330223	No
cg03575122	8	UBR5	0.65 (0.03)	0.65 (0.03)	0.64 (0.03)	0.0187911	0.330223	Yes
cg17490844	2	HS6ST1	0.87 (0.02)	0.87 (0.02)	0.86 (0.02)	0.0188193	0.330223	Yes
cg25269247	17	SLC25A39	0.1 (0.02)	0.09 (0.02)	0.09 (0.02)	0.0188249	0.330223	Yes
cg08940075	1	CNN3	0.87 (0.02)	0.88 (0.02)	0.88 (0.02)	0.0188745	0.330223	No
cg02228185	17	ASPA	0.78 (0.05)	0.78 (0.05)	0.81 (0.05)	0.0188891	0.330223	Yes
cg21399057	17	HOXB3	0.88 (0.02)	0.88 (0.02)	0.87 (0.02)	0.0189555	0.33068	Yes
cg03109660	4	RELL1	0.67 (0.04)	0.66 (0.04)	0.66 (0.04)	0.0189766	0.33068	Yes
cg02673107	6	COL11A2	0.44 (0.03)	0.44 (0.03)	0.43 (0.03)	0.0189861	0.33068	Yes
cg12043019	22	PIM3	0.07 (0.02)	0.07 (0.02)	0.07 (0.02)	0.0190048	0.330684	No
cg02003183	14	CDC42BPB	0.19 (0.03)	0.18 (0.03)	0.2 (0.03)	0.0190598	0.330684	Yes
cg00007076	8	RRS1	0.54 (0.05)	0.53 (0.04)	0.52 (0.04)	0.0190851	0.330684	No
cg09607043	17		0.31 (0.04)	0.31 (0.05)	0.33 (0.04)	0.0190876	0.330684	Yes
cg07082186	3	DCUN1D1	0.11 (0.01)	0.11 (0.01)	0.1 (0.01)	0.01911	0.330684	Yes
cg00741986	4	TNIP2	0.65 (0.04)	0.65 (0.04)	0.64 (0.04)	0.0191298	0.330684	No
cg19220282	2	SLC1A4	0.35 (0.08)	0.33 (0.07)	0.32 (0.07)	0.0191417	0.330684	No
cg14339750	3	TWF2	0.59 (0.02)	0.59 (0.02)	0.58 (0.02)	0.019178	0.330684	No
cg00533649	19		0.4 (0.03)	0.4 (0.03)	0.39 (0.03)	0.0191838	0.330684	Yes
cg26452056	10		0.13 (0.04)	0.13 (0.04)	0.14 (0.04)	0.0191887	0.330684	Yes
cg25002152	10		0.83 (0.02)	0.83 (0.02)	0.83 (0.02)	0.0192115	0.330684	Yes
cg10919522	14	C14orf43	0.25 (0.05)	0.25 (0.05)	0.23 (0.04)	0.0192165	0.330684	No
cg05251389	22	BIK	0.62 (0.03)	0.62 (0.03)	0.63 (0.03)	0.0192808	0.330789	Yes
cg11530693	1	ZNF697	0.87 (0.05)	0.87 (0.05)	0.89 (0.04)	0.0193123	0.330789	Yes
cg10580293	7	PRR15	0.12 (0.04)	0.11 (0.04)	0.1 (0.03)	0.0193191	0.330789	No
cg19628934	14		0.44 (0.03)	0.43 (0.04)	0.43 (0.03)	0.0193276	0.330789	Yes
cg02029665	22	LOC100271722	0.85 (0.02)	0.84 (0.02)	0.84 (0.02)	0.0193307	0.330789	Yes
cg06445343	7	PPP1R9A	0.73 (0.04)	0.72 (0.04)	0.71 (0.03)	0.0193467	0.330789	Yes
cg11647493	6	PECI	0.58 (0.04)	0.57 (0.04)	0.56 (0.04)	0.0194104	0.331242	Yes
cg21071793	3	ATG7	0.78 (0.03)	0.78 (0.03)	0.78 (0.03)	0.0194217	0.331242	Yes
cg25026401	12	SLC15A4	0.06 (0.01)	0.06 (0.01)	0.06 (0.01)	0.0194389	0.331242	Yes
cg09055507	16	PYCARD	0.51 (0.02)	0.5 (0.02)	0.5 (0.02)	0.0194441	0.331242	Yes
cg20894270	18	ANKRD29	0.85 (0.02)	0.84 (0.02)	0.84 (0.02)	0.019471	0.331398	Yes
cg23261171	13	AKAP11	0.79 (0.04)	0.79 (0.04)	0.78 (0.03)	0.0195115	0.331784	Yes
cg01639898	1	HCRTR1	0.35 (0.03)	0.35 (0.03)	0.37 (0.04)	0.0195303	0.331802	Yes
cg11042320	5	PDGFRB	0.81 (0.03)	0.81 (0.03)	0.8 (0.03)	0.0195869	0.33246	Yes
cg27532360	17	ITGA2B	0.78 (0.03)	0.77 (0.03)	0.76 (0.03)	0.0196076	0.332479	No
cg03565777	12		0.75 (0.07)	0.76 (0.07)	0.73 (0.07)	0.0196236	0.332479	Yes
cg16794579	16	XYLT1	0.62 (0.04)	0.61 (0.04)	0.61 (0.04)	0.019654	0.332692	No
cg14163311	1	RASSF5	0.78 (0.04)	0.78 (0.04)	0.77 (0.04)	0.0196885	0.332783	No
cg03176996	5	ELL2	0.55 (0.05)	0.55 (0.06)	0.53 (0.06)	0.019695	0.332783	Yes
cg19717773	7	GNA12	0.63 (0.07)	0.63 (0.08)	0.59 (0.08)	0.0197721	0.332996	No
cg26510500	2	LOXL3	0.92 (0.01)	0.92 (0.01)	0.91 (0.01)	0.0197833	0.332996	No
cg07954423	9	FAM102A	0.2 (0.03)	0.19 (0.03)	0.18 (0.03)	0.0197869	0.332996	No
cg06398251	3	EIF4G1	0.63 (0.04)	0.63 (0.04)	0.62 (0.03)	0.0197934	0.332996	No
cg01426818	17		0.41 (0.04)	0.39 (0.04)	0.39 (0.03)	0.0198013	0.332996	Yes
cg11385249	19	MYO9B	0.82 (0.03)	0.83 (0.03)	0.82 (0.03)	0.0198146	0.332996	Yes
cg07121795	1	NECAP2	0.53 (0.05)	0.52 (0.05)	0.53 (0.05)	0.0198716	0.333654	Yes
cg05927789	2	TTC7A	0.54 (0.05)	0.53 (0.04)	0.52 (0.04)	0.0198934	0.333719	Yes
cg05886626	15	THBS1	0.26 (0.04)	0.26 (0.04)	0.25 (0.05)	0.0199644	0.334207	No
cg16454902	16	IL21R	0.26 (0.04)	0.27 (0.04)	0.28 (0.04)	0.0199758	0.334207	Yes
cg01571001	3		0.83 (0.05)	0.82 (0.06)	0.81 (0.07)	0.0199961	0.334207	Yes
cg25323554	17	C17orf63	0.59 (0.04)	0.58 (0.03)	0.57 (0.04)	0.0200073	0.334207	No
cg09234252	10		0.73 (0.05)	0.73 (0.05)	0.74 (0.04)	0.0200327	0.334207	Yes
cg16455894	17	MPRIP	0.5 (0.02)	0.5 (0.02)	0.51 (0.02)	0.0200499	0.334207	Yes
cg13204977	7		0.87 (0.02)	0.86 (0.02)	0.86 (0.02)	0.0200758	0.334207	Yes
cg00378510	19	LINGO3	0.37 (0.06)	0.36 (0.07)	0.34 (0.06)	0.0200804	0.334207	No
cg27172745	16	BANP	0.86 (0.02)	0.85 (0.03)	0.87 (0.03)	0.0201052	0.334207	Yes
cg05175803	11	CD82	0.57 (0.04)	0.57 (0.04)	0.56 (0.03)	0.020111	0.334207	Yes
cg02859866	10	FRMD4A	0.09 (0.02)	0.09 (0.01)	0.1 (0.02)	0.0201291	0.334207	No
cg20476159	18	CTDP1	0.23 (0.03)	0.23 (0.03)	0.24 (0.03)	0.0201919	0.334207	Yes
cg20146909	1	LRRC8D	0.75 (0.03)	0.75 (0.03)	0.74 (0.03)	0.0201977	0.334207	Yes
cg03484180	3	MON1A	0.35 (0.04)	0.36 (0.04)	0.34 (0.04)	0.020215	0.334207	Yes
cg15154047	8		0.51 (0.03)	0.52 (0.03)	0.51 (0.04)	0.0202269	0.334207	Yes
cg01076459	17	RAP1GAP2	0.65 (0.03)	0.64 (0.04)	0.63 (0.03)	0.0202326	0.334207	Yes
cg01717524	1		0.7 (0.03)	0.71 (0.04)	0.7 (0.03)	0.0202419	0.334207	Yes
cg25252598	12		0.12 (0.02)	0.12 (0.02)	0.11 (0.02)	0.0202447	0.334207	Yes
cg01255894	10	GATA3	0.06 (0.01)	0.06 (0.01)	0.06 (0.01)	0.0203506	0.335363	No
cg15789789	22	TMEM184B	0.89 (0.02)	0.9 (0.02)	0.9 (0.02)	0.0204055	0.335971	Yes
cg10965975	14		0.38 (0.04)	0.38 (0.04)	0.36 (0.05)	0.0205435	0.337896	Yes
cg15995265	1		0.47 (0.05)	0.47 (0.05)	0.46 (0.05)	0.0205586	0.337896	No
cg25998745	8		0.7 (0.04)	0.69 (0.04)	0.69 (0.04)	0.0205925	0.338156	Yes
cg13993176	9		0.9 (0.02)	0.9 (0.02)	0.9 (0.02)	0.0206137	0.338206	Yes
cg17960934	7	AUTS2	0.83 (0.03)	0.83 (0.03)	0.82 (0.03)	0.0206389	0.338323	No
cg02634816	20	UBOX5;FASTKD5	0.28 (0.05)	0.28 (0.05)	0.26 (0.05)	0.0206621	0.338405	Yes
cg18642234	3	GPX1	0.53 (0.04)	0.52 (0.03)	0.51 (0.03)	0.0207105	0.338477	No
cg08563601	2	BARD1	0.53 (0.05)	0.51 (0.05)	0.53 (0.05)	0.0207192	0.338477	No
cg20806180	22	MGAT3	0.92 (0.03)	0.91 (0.04)	0.9 (0.04)	0.020739	0.338477	Yes
cg04625615	15	ITPKA	0.84 (0.03)	0.84 (0.03)	0.83 (0.03)	0.0208255	0.339229	Yes
cg11597157	15	KIF7	0.88 (0.02)	0.88 (0.02)	0.88 (0.02)	0.0208292	0.339229	Yes
cg26038582	1	HIVEP3	0.44 (0.11)	0.41 (0.11)	0.46 (0.1)	0.0208396	0.339229	No
cg02714303	13	LMO7	0.27 (0.04)	0.27 (0.03)	0.28 (0.04)	0.0209913	0.340719	Yes
cg24335116	12	PITPNM2	0.18 (0.04)	0.18 (0.04)	0.19 (0.04)	0.0209972	0.340719	Yes
cg10814005	14	GPR68	0.14 (0.03)	0.13 (0.03)	0.13 (0.03)	0.0209986	0.340719	No
cg00769843	11	OTUB1	0.12 (0.02)	0.12 (0.02)	0.11 (0.03)	0.0210041	0.340719	No
cg10424892	12	DDX12	0.9 (0.03)	0.9 (0.03)	0.91 (0.03)	0.0210636	0.340969	Yes
cg05436939	4	LOC100130872;LOC100130872-SPON2	0.63 (0.02)	0.63 (0.02)	0.63 (0.02)	0.0210697	0.340969	Yes
cg13033858	12	SSH1	0.69 (0.04)	0.69 (0.04)	0.67 (0.04)	0.0210743	0.340969	No
cg19589396	8		0.72 (0.04)	0.72 (0.05)	0.71 (0.05)	0.0211305	0.341313	No
cg08549810	1	ODF2L	0.62 (0.04)	0.61 (0.05)	0.6 (0.05)	0.0211385	0.341313	Yes
cg23531049	15	MAPKBP1	0.84 (0.03)	0.84 (0.03)	0.85 (0.03)	0.0211704	0.341313	Yes
cg01351315	17	LOC404266	0.5 (0.06)	0.49 (0.07)	0.5 (0.06)	0.0211852	0.341313	Yes
cg27193080	3	IFT122	0.82 (0.03)	0.81 (0.03)	0.81 (0.03)	0.021187	0.341313	Yes
cg00904138	8	RPL8	0.05 (0.01)	0.05 (0.01)	0.05 (0.01)	0.0212278	0.341514	Yes
cg12729894	11	HCCA2;CTSD	0.81 (0.02)	0.8 (0.02)	0.8 (0.02)	0.0212447	0.341514	No
cg05673882	5	POLK	0.36 (0.05)	0.35 (0.05)	0.34 (0.05)	0.0212543	0.341514	No
cg07450086	3	SELT	0.34 (0.04)	0.34 (0.04)	0.32 (0.04)	0.0213432	0.342648	Yes
cg04678936	15	TP53BP1	0.26 (0.02)	0.27 (0.02)	0.26 (0.02)	0.0213659	0.342717	Yes
cg02542953	2	MYT1L	0.92 (0.01)	0.92 (0.01)	0.92 (0.01)	0.0214152	0.343212	Yes
cg11958827	1	ST3GAL3	0.83 (0.02)	0.83 (0.03)	0.82 (0.02)	0.021466	0.343732	Yes
cg01513063	17	2009-09-01	0.88 (0.02)	0.87 (0.02)	0.87 (0.02)	0.0215119	0.344172	No
cg00007987	19	ZNF581	0.95 (0.02)	0.95 (0.02)	0.95 (0.01)	0.0215864	0.344707	Yes
cg05091997	17		0.12 (0.04)	0.12 (0.04)	0.1 (0.03)	0.0215957	0.344707	Yes
cg21301258	21	RCAN1	0.68 (0.04)	0.68 (0.04)	0.7 (0.04)	0.0216069	0.344707	Yes
cg10589813	20		0.54 (0.04)	0.53 (0.03)	0.52 (0.03)	0.0216192	0.344707	Yes
cg20712415	3	SCHIP1	0.39 (0.02)	0.38 (0.02)	0.38 (0.02)	0.0216419	0.344775	Yes
cg03761291	16	CREBBP	0.84 (0.03)	0.85 (0.02)	0.84 (0.03)	0.0216696	0.344922	Yes
cg09026568	22	TRABD	0.64 (0.05)	0.64 (0.05)	0.63 (0.04)	0.0217548	0.345639	Yes
cg14428590	15	FSIP1	0.46 (0.04)	0.46 (0.03)	0.44 (0.03)	0.0218004	0.345825	Yes
cg09443360	16	GPR114	0.13 (0.02)	0.13 (0.02)	0.14 (0.02)	0.021877	0.346227	No
cg21550024	4	FGF2	0.57 (0.05)	0.56 (0.05)	0.57 (0.06)	0.0218907	0.346227	Yes
cg10116432	10	NT5C2	0.34 (0.04)	0.33 (0.04)	0.33 (0.04)	0.0219112	0.346227	Yes
cg03485667	16	ZNRF1	0.48 (0.04)	0.48 (0.03)	0.47 (0.03)	0.0219185	0.346227	Yes
cg07793148	1	C1orf200;PIK3CD	0.19 (0.05)	0.18 (0.04)	0.18 (0.05)	0.0219842	0.346972	No
cg08310363	19	MIR181C;MIR181D	0.56 (0.06)	0.55 (0.05)	0.54 (0.05)	0.0220587	0.347375	Yes
cg12777730	10		0.93 (0.02)	0.92 (0.02)	0.92 (0.02)	0.0220617	0.347375	Yes
cg14602222	12	RAD52	0.59 (0.05)	0.6 (0.04)	0.61 (0.04)	0.0220656	0.347375	No
cg21140898	1		0.33 (0.06)	0.32 (0.06)	0.31 (0.05)	0.0220991	0.34761	No
cg05793240	7	GNA12	0.76 (0.04)	0.77 (0.05)	0.75 (0.04)	0.0221767	0.348347	No
cg17705631	7	GNA12	0.74 (0.03)	0.73 (0.03)	0.73 (0.02)	0.0222006	0.348347	No
cg23015664	7	MAD1L1	0.9 (0.02)	0.9 (0.02)	0.91 (0.02)	0.022202	0.348347	No
cg09496748	2	ANKRD44	0.84 (0.03)	0.83 (0.03)	0.83 (0.03)	0.0222736	0.348839	Yes
cg02902412	18	ATP9B	0.77 (0.07)	0.77 (0.07)	0.8 (0.06)	0.0222881	0.348839	Yes
cg01513913	14		0.41 (0.04)	0.41 (0.04)	0.39 (0.04)	0.0222894	0.348839	Yes
cg01097768	5	AHRR	0.74 (0.04)	0.74 (0.04)	0.73 (0.04)	0.0223778	0.349637	No
cg20698113	22	PIM3	0.87 (0.03)	0.87 (0.03)	0.86 (0.03)	0.0224024	0.349729	No
cg14524643	9	SARDH	0.53 (0.04)	0.53 (0.04)	0.52 (0.03)	0.0224276	0.34983	Yes
cg27633342	15	MYO5C	0.43 (0.06)	0.42 (0.06)	0.44 (0.06)	0.0224679	0.350165	Yes
cg17514353	11	UCP3	0.87 (0.02)	0.86 (0.02)	0.87 (0.02)	0.0225236	0.350741	Yes
cg27264437	1	SMAP2	0.88 (0.02)	0.88 (0.02)	0.87 (0.02)	0.0225568	0.350965	No
cg00949249	2		0.6 (0.02)	0.6 (0.02)	0.61 (0.02)	0.0225886	0.351168	Yes
cg02341571	15	PATL2	0.53 (0.04)	0.52 (0.04)	0.55 (0.04)	0.0226748	0.35157	Yes
cg18836847	9	TUBB2C	0.14 (0.02)	0.14 (0.02)	0.14 (0.02)	0.0226799	0.35157	Yes
cg08090835	6	RPS18	0.89 (0.02)	0.89 (0.02)	0.89 (0.02)	0.0226981	0.35157	No
cg09667394	1	AK5	0.38 (0.05)	0.37 (0.05)	0.39 (0.06)	0.0227046	0.35157	Yes
cg17733447	17	SP6	0.39 (0.04)	0.39 (0.04)	0.38 (0.04)	0.0227217	0.35157	Yes
cg13392885	2		0.88 (0.02)	0.88 (0.02)	0.89 (0.02)	0.0227394	0.35157	Yes
cg03420040	16		0.71 (0.05)	0.71 (0.05)	0.69 (0.08)	0.0227567	0.35157	Yes
cg11335172	2	IL18RAP	0.93 (0.02)	0.93 (0.02)	0.94 (0.02)	0.0227832	0.35157	Yes
cg26878709	11	TMEM136	0.67 (0.05)	0.66 (0.05)	0.68 (0.05)	0.0227933	0.35157	Yes
cg20764656	14	GPX2	0.3 (0.06)	0.29 (0.06)	0.31 (0.05)	0.0228028	0.35157	Yes
cg13053992	21		0.67 (0.04)	0.67 (0.04)	0.65 (0.03)	0.0228359	0.351672	Yes
cg05714552	6	PRRT1	0.44 (0.03)	0.43 (0.03)	0.43 (0.03)	0.0228727	0.351672	No
cg01987941	14	BCL11B	0.09 (0.02)	0.08 (0.02)	0.08 (0.02)	0.0228926	0.351672	No
cg26648185	21	TIAM1	0.58 (0.04)	0.58 (0.04)	0.57 (0.03)	0.0229047	0.351672	Yes
cg13803727	9		0.62 (0.04)	0.62 (0.03)	0.62 (0.03)	0.0229222	0.351672	Yes
cg07470570	7	AUTS2	0.52 (0.05)	0.51 (0.05)	0.52 (0.04)	0.0229246	0.351672	No
cg06382664	11	RELT	0.52 (0.04)	0.53 (0.04)	0.51 (0.04)	0.0229413	0.351672	Yes
cg19070894	5		0.21 (0.03)	0.22 (0.04)	0.23 (0.04)	0.0230455	0.352719	Yes
cg21380183	20	ATP9A	0.1 (0.04)	0.09 (0.04)	0.08 (0.03)	0.0230473	0.352719	No
cg26420795	21		0.73 (0.07)	0.74 (0.06)	0.71 (0.07)	0.0230768	0.352837	Yes
cg23441595	22	NCF4	0.4 (0.04)	0.39 (0.03)	0.38 (0.04)	0.0231043	0.352837	No
cg13136655	6	ZC3H12D	0.17 (0.05)	0.17 (0.05)	0.14 (0.04)	0.0231336	0.352837	No
cg00142036	10	SEPHS1	0.81 (0.05)	0.8 (0.05)	0.79 (0.05)	0.0231545	0.352837	Yes
cg06219204	16		0.8 (0.04)	0.8 (0.04)	0.79 (0.04)	0.0231608	0.352837	Yes
cg00770316	2		0.78 (0.03)	0.78 (0.03)	0.77 (0.03)	0.0231685	0.352837	Yes
cg21406967	7	TRIP6;SLC12A9	0.39 (0.04)	0.38 (0.04)	0.38 (0.04)	0.0232186	0.353241	No
cg22050950	2	ANKRD53	0.55 (0.04)	0.55 (0.04)	0.56 (0.04)	0.0232585	0.353241	No
cg16771652	16	NOD2	0.27 (0.04)	0.26 (0.04)	0.26 (0.04)	0.0232706	0.353241	Yes
cg07992484	2	UXS1	0.65 (0.03)	0.65 (0.04)	0.64 (0.03)	0.0233004	0.353405	No
cg17498867	2	CYP26B1	0.23 (0.02)	0.22 (0.03)	0.22 (0.02)	0.023325	0.353491	Yes
cg16694480	1	CAPZB	0.67 (0.03)	0.67 (0.04)	0.68 (0.04)	0.0233966	0.353902	No
cg17580614	17	ADORA2B	0.74 (0.05)	0.74 (0.05)	0.72 (0.06)	0.0234124	0.353902	Yes
cg00127150	22	ZNF280B	0.78 (0.03)	0.77 (0.04)	0.76 (0.03)	0.023433	0.353902	No
cg16521040	19	MRPL34	0.34 (0.04)	0.33 (0.04)	0.33 (0.04)	0.023439	0.353902	Yes
cg05236720	2	CDC42EP3	0.64 (0.05)	0.63 (0.06)	0.64 (0.06)	0.0234469	0.353902	Yes
cg14486857	11	AP2A2	0.86 (0.02)	0.86 (0.02)	0.86 (0.02)	0.0234661	0.353906	No
cg19784816	3	ITIH1	0.79 (0.02)	0.78 (0.02)	0.8 (0.02)	0.0235314	0.354427	Yes
cg06495038	5	CRHBP	0.5 (0.04)	0.51 (0.04)	0.49 (0.04)	0.0235386	0.354427	Yes
cg13751330	9	POMT1	0.89 (0.02)	0.89 (0.01)	0.88 (0.01)	0.0236427	0.355219	Yes
cg13443605	17	HS3ST3B1;MGC12916	0.16 (0.04)	0.15 (0.04)	0.14 (0.04)	0.0236532	0.355219	Yes
cg01208318	14		0.49 (0.08)	0.49 (0.08)	0.46 (0.07)	0.0236558	0.355219	No
cg09183671	10	LOC282997;PDCD4	0.83 (0.03)	0.83 (0.03)	0.82 (0.03)	0.0236875	0.355219	Yes
cg04666465	16	GGA2	0.47 (0.04)	0.47 (0.04)	0.46 (0.04)	0.0236967	0.355219	Yes
cg15962267	5	SNHG4;SNORA74A;MATR3	0.67 (0.04)	0.67 (0.04)	0.66 (0.04)	0.0237167	0.355219	No
cg14270346	9	SHB	0.9 (0.02)	0.9 (0.02)	0.9 (0.02)	0.0238187	0.355219	No
cg02256576	16	CES3	0.45 (0.04)	0.44 (0.04)	0.43 (0.05)	0.0238294	0.355219	Yes
cg19825437	3		0.84 (0.02)	0.83 (0.03)	0.83 (0.02)	0.0238409	0.355219	Yes
cg03530687	7	LAMB4	0.89 (0.03)	0.88 (0.02)	0.89 (0.02)	0.0238461	0.355219	Yes
cg11320499	3	ABCC5	0.71 (0.09)	0.69 (0.08)	0.72 (0.09)	0.0238569	0.355219	Yes
cg08879528	10	CCDC3	0.83 (0.05)	0.81 (0.06)	0.82 (0.05)	0.0238576	0.355219	Yes
cg10974463	14	NFATC4	0.33 (0.03)	0.32 (0.03)	0.34 (0.03)	0.0239589	0.356443	Yes
cg21029045	4	PITX2	0.22 (0.04)	0.21 (0.04)	0.21 (0.03)	0.0239997	0.356654	Yes
cg15698299	3	ALAS1	0.31 (0.04)	0.31 (0.04)	0.3 (0.04)	0.0240194	0.356654	No
cg19203115	18	B4GALT6	0.37 (0.05)	0.37 (0.05)	0.38 (0.04)	0.0240348	0.356654	Yes
cg17296078	10	MMS19;UBTD1	0.35 (0.05)	0.34 (0.05)	0.36 (0.05)	0.0240494	0.356654	No
cg16744741	4	PRKG2	0.38 (0.04)	0.38 (0.04)	0.39 (0.05)	0.024159	0.35779	Yes
cg05832509	7	TRIM4	0.85 (0.02)	0.85 (0.02)	0.84 (0.02)	0.0241644	0.35779	Yes
cg13420364	1		0.43 (0.04)	0.42 (0.04)	0.42 (0.03)	0.0242098	0.358064	Yes
cg22752023	10	PYROXD2	0.05 (0.02)	0.04 (0.01)	0.05 (0.01)	0.0242331	0.358064	Yes
cg10121429	16	CFDP1	0.12 (0.02)	0.12 (0.02)	0.11 (0.02)	0.0242405	0.358064	Yes
cg17585031	17	KSR1	0.57 (0.03)	0.57 (0.03)	0.56 (0.03)	0.0243411	0.358443	No
cg20981127	19	NR2F6	0.2 (0.04)	0.2 (0.04)	0.21 (0.04)	0.0243429	0.358443	No
cg06005844	17	HS3ST3B1;MGC12916	0.25 (0.03)	0.25 (0.03)	0.23 (0.03)	0.0244033	0.358764	Yes
cg03502002	18	GALR1	0.11 (0.06)	0.11 (0.06)	0.13 (0.06)	0.0244066	0.358764	Yes
cg04994405	1	DNAJC6	0.23 (0.03)	0.23 (0.04)	0.24 (0.04)	0.0244891	0.359076	Yes
cg03531754	8	FAM83A	0.81 (0.04)	0.82 (0.04)	0.82 (0.04)	0.0244998	0.359076	Yes
cg22579075	7	SGCE	0.76 (0.05)	0.76 (0.05)	0.75 (0.05)	0.0245012	0.359076	Yes
cg05232694	20		0.46 (0.06)	0.45 (0.06)	0.44 (0.05)	0.0245394	0.359085	Yes
cg12303084	20	ZMYND8	0.21 (0.03)	0.21 (0.03)	0.2 (0.03)	0.024553	0.359085	No
cg25801976	8	KIAA0146	0.36 (0.06)	0.35 (0.07)	0.36 (0.06)	0.0245595	0.359085	No
cg10096893	1		0.41 (0.05)	0.4 (0.05)	0.42 (0.04)	0.0247324	0.360479	Yes
cg18951352	6	ZC3H12D	0.22 (0.05)	0.22 (0.05)	0.19 (0.04)	0.0247471	0.360479	No
cg13691961	12	DUSP6	0.78 (0.05)	0.78 (0.05)	0.76 (0.05)	0.0247652	0.360479	No
cg22313519	19	KIAA1683	0.51 (0.04)	0.51 (0.04)	0.5 (0.04)	0.0247739	0.360479	No
cg21872009	17	PPY2	0.65 (0.04)	0.65 (0.04)	0.64 (0.04)	0.0247901	0.360479	Yes
cg15498134	1	RUNX3	0.7 (0.06)	0.7 (0.06)	0.68 (0.06)	0.0248256	0.360614	No
cg00210249	10	HK1	0.77 (0.04)	0.77 (0.04)	0.79 (0.04)	0.024838	0.360614	No
cg26099045	2		0.69 (0.05)	0.69 (0.04)	0.7 (0.04)	0.024872	0.360643	Yes
cg22871253	6	EZR	0.3 (0.05)	0.3 (0.05)	0.29 (0.05)	0.0248786	0.360643	Yes
cg04077141	22	MYH9	0.15 (0.02)	0.14 (0.02)	0.14 (0.02)	0.0249234	0.360892	Yes
cg22434594	17		0.56 (0.03)	0.55 (0.03)	0.57 (0.03)	0.0249344	0.360892	Yes
cg01534799	16	FLYWCH1	0.88 (0.04)	0.87 (0.04)	0.88 (0.03)	0.0249778	0.36124	Yes
cg24361098	2	BCL11A	0.65 (0.06)	0.64 (0.06)	0.65 (0.05)	0.0250512	0.362022	Yes
cg24150385	3	LRIG1	0.82 (0.03)	0.81 (0.03)	0.81 (0.03)	0.0251299	0.362645	No
cg03233656	2	SLC1A4	0.37 (0.06)	0.36 (0.06)	0.35 (0.06)	0.0251332	0.362645	No
cg26579578	11		0.96 (0.02)	0.97 (0.02)	0.96 (0.02)	0.0253	0.363595	Yes
cg26929272	10		0.86 (0.03)	0.86 (0.03)	0.85 (0.04)	0.0253009	0.363595	Yes
cg01150799	4	HADH	0.56 (0.04)	0.55 (0.05)	0.56 (0.04)	0.0253054	0.363595	Yes
cg00492055	3	CEP70	0.9 (0.06)	0.9 (0.06)	0.87 (0.07)	0.0253074	0.363595	Yes
cg26153045	7	ELN	0.48 (0.04)	0.48 (0.04)	0.47 (0.03)	0.0253159	0.363595	Yes
cg17415650	12		0.79 (0.02)	0.79 (0.02)	0.79 (0.02)	0.0253737	0.363614	Yes
cg02329430	15	NPTN	0.39 (0.06)	0.38 (0.06)	0.4 (0.06)	0.025378	0.363614	No
cg13191049	15	SYNM	0.16 (0.02)	0.15 (0.02)	0.16 (0.02)	0.0254071	0.363614	Yes
cg21691065	1		0.24 (0.03)	0.23 (0.03)	0.24 (0.03)	0.0254341	0.363614	Yes
cg26822480	16	WFDC1	0.96 (0.01)	0.96 (0.01)	0.95 (0.01)	0.0254433	0.363614	Yes
cg13024368	11	DKK3	0.12 (0.03)	0.12 (0.03)	0.12 (0.02)	0.0255068	0.363614	Yes
cg14315430	12	MBD6;DDIT3	0.56 (0.04)	0.55 (0.05)	0.55 (0.04)	0.0255215	0.363614	Yes
cg08315483	16	KIAA0182	0.8 (0.03)	0.79 (0.03)	0.79 (0.03)	0.0255269	0.363614	Yes
cg26790897	7	SUMF2	0.47 (0.03)	0.47 (0.03)	0.49 (0.03)	0.0255287	0.363614	No
cg24173182	17	HIC1	0.57 (0.05)	0.57 (0.05)	0.59 (0.05)	0.0255457	0.363614	No
cg05208178	2	INPP5D	0.27 (0.03)	0.26 (0.03)	0.26 (0.02)	0.0255677	0.363614	No
cg07469402	12	DBX2	0.13 (0.06)	0.13 (0.06)	0.15 (0.07)	0.0255704	0.363614	Yes
cg05462339	5	SIL1	0.63 (0.03)	0.63 (0.03)	0.64 (0.03)	0.0256123	0.363933	Yes
cg16209444	3	ACOX2	0.74 (0.02)	0.74 (0.02)	0.74 (0.02)	0.0256347	0.363973	No
cg19362478	1		0.64 (0.04)	0.63 (0.04)	0.64 (0.04)	0.0256702	0.364201	Yes
cg07150862	16	GGA2	0.37 (0.05)	0.36 (0.06)	0.35 (0.06)	0.0257706	0.365242	Yes
cg16936060	4	HOPX	0.39 (0.05)	0.4 (0.05)	0.41 (0.04)	0.0257827	0.365242	No
cg00728848	6	C6orf114;GFOD1	0.91 (0.02)	0.91 (0.02)	0.91 (0.01)	0.0258114	0.365371	Yes
cg25839482	15	IMP3	0.1 (0.02)	0.1 (0.02)	0.09 (0.02)	0.0258574	0.365662	Yes
cg17922695	17	2009-09-01	0.64 (0.04)	0.64 (0.04)	0.63 (0.04)	0.0258711	0.365662	No
cg24522654	12		0.74 (0.05)	0.74 (0.04)	0.73 (0.05)	0.0259155	0.365908	Yes
cg14775286	3	DZIP1L	0.4 (0.05)	0.4 (0.05)	0.38 (0.05)	0.0259277	0.365908	Yes
cg27655512	11		0.13 (0.02)	0.13 (0.02)	0.14 (0.02)	0.0259921	0.366271	Yes
cg05800339	16	ZNRF1	0.66 (0.02)	0.66 (0.02)	0.65 (0.02)	0.0259996	0.366271	Yes
cg10143507	2		0.39 (0.04)	0.38 (0.04)	0.37 (0.03)	0.0260487	0.366271	Yes
cg18369034	14	PTGDR	0.79 (0.04)	0.79 (0.04)	0.78 (0.04)	0.0260547	0.366271	No
cg11898695	6	PTCRA	0.87 (0.03)	0.86 (0.03)	0.87 (0.02)	0.0260677	0.366271	No
cg20220678	8	SH2D4A	0.74 (0.04)	0.73 (0.03)	0.72 (0.03)	0.0261034	0.366271	Yes
cg19884658	1	KLHL21	0.81 (0.03)	0.8 (0.03)	0.81 (0.03)	0.0261094	0.366271	Yes
cg20348746	2		0.65 (0.07)	0.64 (0.06)	0.61 (0.07)	0.0261397	0.366271	Yes
cg18915128	17	UNC119	0.41 (0.03)	0.41 (0.03)	0.4 (0.02)	0.0261756	0.366271	Yes
cg10690887	18	ABHD3	0.17 (0.03)	0.17 (0.04)	0.18 (0.03)	0.0261897	0.366271	Yes
cg23008718	2		0.34 (0.05)	0.34 (0.05)	0.34 (0.04)	0.026206	0.366271	No
cg19744173	2	FBLN7	0.22 (0.02)	0.22 (0.02)	0.23 (0.02)	0.0262085	0.366271	Yes
cg09104284	16	AFG3L1	0.9 (0.02)	0.9 (0.02)	0.89 (0.02)	0.0262549	0.366646	Yes
cg06933384	5	COL4A3BP;POLK	0.19 (0.05)	0.19 (0.05)	0.17 (0.04)	0.0262776	0.366688	No
cg18645642	1	RERE	0.83 (0.03)	0.82 (0.03)	0.82 (0.02)	0.0263307	0.367155	Yes
cg07139440	1	CDC42SE1;MLLT11	0.04 (0.01)	0.04 (0.01)	0.03 (0.01)	0.0263785	0.367361	No
cg00976097	5	AHRR	0.9 (0.06)	0.9 (0.05)	0.92 (0.04)	0.0264193	0.367361	No
cg13429095	1		0.55 (0.05)	0.54 (0.05)	0.54 (0.05)	0.0264254	0.367361	Yes
cg02891728	7	WDR86	0.81 (0.03)	0.8 (0.03)	0.81 (0.03)	0.0264438	0.367361	Yes
cg06770878	2		0.57 (0.05)	0.57 (0.05)	0.59 (0.05)	0.0264727	0.367446	Yes
cg15794034	11	AMICA1	0.07 (0.02)	0.07 (0.02)	0.06 (0.01)	0.0265162	0.367446	No
cg00566899	1	USH2A	0.81 (0.02)	0.8 (0.03)	0.8 (0.03)	0.0265287	0.367446	No
cg21915678	17		0.95 (0.02)	0.95 (0.02)	0.95 (0.02)	0.0265782	0.367858	Yes
cg19344626	19	NWD1	0.69 (0.06)	0.69 (0.06)	0.67 (0.05)	0.026611	0.36804	Yes
cg27345946	3	ARPC4;TADA3	0.63 (0.04)	0.63 (0.04)	0.62 (0.04)	0.026673	0.368624	Yes
cg00357551	5	FAM196B;DOCK2	0.51 (0.07)	0.51 (0.07)	0.52 (0.06)	0.0267937	0.369812	No
cg15827092	14		0.69 (0.05)	0.68 (0.05)	0.67 (0.04)	0.0269	0.370938	Yes
cg00817377	7	ELN	0.29 (0.03)	0.29 (0.03)	0.28 (0.03)	0.0269596	0.371284	Yes
cg16457842	6	SNAP91	0.65 (0.05)	0.64 (0.05)	0.67 (0.05)	0.0269649	0.371284	Yes
cg19015086	22	SEC14L2	0.48 (0.03)	0.47 (0.03)	0.46 (0.03)	0.0269988	0.371478	Yes
cg10385101	7	PRKAR1B	0.34 (0.04)	0.33 (0.04)	0.34 (0.03)	0.0270459	0.371851	No
cg25974380	14		0.11 (0.02)	0.11 (0.02)	0.12 (0.02)	0.0271352	0.37265	Yes
cg00834988	7	AUTS2	0.48 (0.06)	0.47 (0.06)	0.48 (0.05)	0.0272238	0.37265	No
cg26139080	11	MADD	0.58 (0.06)	0.57 (0.06)	0.59 (0.06)	0.0272302	0.37265	Yes
cg11554391	5	AHRR	0.17 (0.03)	0.17 (0.03)	0.16 (0.03)	0.0272472	0.37265	No
cg06940168	17	PRKCA	0.51 (0.06)	0.5 (0.06)	0.5 (0.05)	0.0272593	0.37265	No
cg14868222	6	LTB	0.46 (0.03)	0.46 (0.03)	0.45 (0.03)	0.02726	0.37265	No
cg19046189	19	HSD17B14	0.73 (0.03)	0.72 (0.03)	0.73 (0.03)	0.0272994	0.372769	Yes
cg22546168	10	VENTX	0.13 (0.04)	0.13 (0.04)	0.14 (0.05)	0.027328	0.372769	Yes
cg08568554	13	BIVM	0.83 (0.03)	0.83 (0.02)	0.84 (0.03)	0.027342	0.372769	Yes
cg10267724	20	TMEM90B	0.16 (0.03)	0.15 (0.02)	0.16 (0.02)	0.0273523	0.372769	Yes
cg20644981	4	RPS3A	0.2 (0.04)	0.2 (0.04)	0.21 (0.04)	0.0273762	0.372824	Yes
cg00706683	2	ECEL1P2	0.66 (0.03)	0.67 (0.03)	0.67 (0.03)	0.027423	0.372979	No
cg05845217	5		0.84 (0.03)	0.83 (0.04)	0.82 (0.03)	0.0274587	0.372979	Yes
cg23654112	16	TBC1D24	0.39 (0.02)	0.39 (0.02)	0.39 (0.02)	0.0274656	0.372979	Yes
cg07607074	6	DAXX	0.67 (0.03)	0.67 (0.03)	0.66 (0.03)	0.0274675	0.372979	No
cg22186216	15	CYP11A1	0.65 (0.03)	0.65 (0.03)	0.64 (0.03)	0.0275254	0.373339	Yes
cg23051559	11		0.28 (0.03)	0.28 (0.03)	0.29 (0.03)	0.027534	0.373339	Yes
cg21181162	8		0.84 (0.04)	0.83 (0.04)	0.83 (0.04)	0.0276139	0.374151	Yes
cg24572204	5	TTC33	0.79 (0.03)	0.78 (0.03)	0.79 (0.04)	0.0276455	0.374197	Yes
cg20902757	8		0.64 (0.04)	0.63 (0.04)	0.62 (0.05)	0.0276764	0.374197	Yes
cg15824323	5		0.82 (0.03)	0.83 (0.03)	0.82 (0.03)	0.0276807	0.374197	No
cg15742116	19	FBN3	0.18 (0.03)	0.19 (0.03)	0.19 (0.03)	0.027711	0.374197	Yes
cg26850624	5	AHRR	0.7 (0.06)	0.69 (0.06)	0.72 (0.05)	0.0277175	0.374197	No
cg06653052	19	C19orf24	0.21 (0.05)	0.21 (0.05)	0.19 (0.05)	0.0278312	0.374719	Yes
cg06630869	19	SAPS1	0.11 (0.01)	0.1 (0.01)	0.1 (0.01)	0.0278414	0.374719	Yes
cg27505349	6	TUBB	0.7 (0.05)	0.69 (0.05)	0.68 (0.04)	0.0278466	0.374719	No
cg15636519	2	STAT4	0.15 (0.03)	0.16 (0.03)	0.14 (0.03)	0.0278538	0.374719	No
cg06778159	7	TNRC18	0.91 (0.01)	0.9 (0.01)	0.9 (0.02)	0.0278566	0.374719	No
cg21333674	8		0.46 (0.06)	0.45 (0.06)	0.44 (0.06)	0.0278925	0.374932	Yes
cg27262054	16	ZFHX3	0.67 (0.03)	0.67 (0.04)	0.66 (0.03)	0.0279605	0.375508	No
cg26566236	6	HECA	0.88 (0.03)	0.87 (0.03)	0.87 (0.02)	0.0279756	0.375508	Yes
cg08233235	19	RPL28	0.71 (0.04)	0.71 (0.04)	0.69 (0.04)	0.0279998	0.375563	Yes
cg21046160	22	C22orf15	0.14 (0.03)	0.14 (0.02)	0.15 (0.03)	0.0281087	0.376483	Yes
cg22511775	8	ARHGEF10	0.75 (0.03)	0.75 (0.04)	0.76 (0.03)	0.0282016	0.377186	No
cg24805985	8	DOCK5	0.88 (0.02)	0.88 (0.02)	0.88 (0.02)	0.0282293	0.377192	Yes
cg18250846	2		0.1 (0.02)	0.09 (0.02)	0.1 (0.02)	0.0282463	0.377192	Yes
cg03746015	16	CLEC16A	0.83 (0.05)	0.82 (0.04)	0.81 (0.04)	0.0282626	0.377192	Yes
cg04408104	2	WDSUB1	0.25 (0.06)	0.25 (0.06)	0.26 (0.05)	0.0284185	0.379001	Yes
cg06197751	3	SGEF	0.49 (0.03)	0.49 (0.03)	0.5 (0.03)	0.0284715	0.379101	Yes
cg12072560	18	CIDEA	0.07 (0.02)	0.07 (0.02)	0.07 (0.02)	0.0284795	0.379101	Yes
cg22353551	1		0.16 (0.04)	0.16 (0.04)	0.17 (0.04)	0.0284869	0.379101	Yes
cg19426731	19	RPL13AP5;SNORD33;SNORD32A;RPL13A	0.16 (0.03)	0.16 (0.03)	0.15 (0.03)	0.0285621	0.379672	Yes
cg05465955	17	COASY	0.74 (0.04)	0.73 (0.04)	0.72 (0.03)	0.0286072	0.379672	Yes
cg25658983	13	SIAH3	0.35 (0.05)	0.34 (0.05)	0.36 (0.05)	0.0286096	0.379672	Yes
cg11601297	19	ITPKC;ADCK4	0.75 (0.04)	0.74 (0.04)	0.74 (0.04)	0.0286111	0.379672	No
cg25793587	15	SMAD3	0.79 (0.04)	0.79 (0.04)	0.78 (0.04)	0.0287393	0.380948	Yes
cg18302606	19	PLEKHG2	0.22 (0.05)	0.2 (0.05)	0.2 (0.05)	0.0287682	0.380948	Yes
cg03059073	7		0.31 (0.04)	0.3 (0.04)	0.33 (0.04)	0.0288089	0.381213	Yes
cg26885220	1	DNAJC6	0.08 (0.03)	0.08 (0.03)	0.08 (0.03)	0.0288539	0.381431	Yes
cg08802607	3	ATP2B2	0.4 (0.04)	0.41 (0.04)	0.42 (0.04)	0.0288663	0.381431	Yes
cg04137490	8	DOCK5	0.88 (0.04)	0.88 (0.04)	0.9 (0.03)	0.0289035	0.381547	Yes
cg08306076	6		0.32 (0.05)	0.31 (0.05)	0.32 (0.05)	0.028929	0.381547	Yes
cg13905757	10	FAM171A1	0.31 (0.03)	0.31 (0.03)	0.32 (0.03)	0.028952	0.381547	Yes
cg23886216	14		0.59 (0.03)	0.6 (0.03)	0.61 (0.03)	0.0289593	0.381547	Yes
cg17823346	10	ZMIZ1	0.54 (0.05)	0.53 (0.05)	0.51 (0.05)	0.0289772	0.381547	No
cg26674546	17	2009-09-01	0.53 (0.04)	0.53 (0.04)	0.51 (0.04)	0.0290009	0.38159	No
cg09092525	20	CDH26	0.59 (0.04)	0.59 (0.04)	0.6 (0.03)	0.0290306	0.381711	Yes
cg16092017	5		0.64 (0.04)	0.65 (0.04)	0.66 (0.03)	0.0290971	0.381826	Yes
cg00156427	11	THY1	0.4 (0.03)	0.39 (0.03)	0.41 (0.03)	0.029106	0.381826	Yes
cg19593285	20	E2F1	0.8 (0.04)	0.8 (0.04)	0.8 (0.03)	0.0291576	0.381826	No
cg13996453	7		0.86 (0.03)	0.87 (0.03)	0.86 (0.02)	0.0291929	0.381826	Yes
cg00788170	1	SNAP47;LOC100130093;JMJD4	0.69 (0.02)	0.68 (0.02)	0.68 (0.02)	0.0291936	0.381826	Yes
cg10622536	1	C1orf113	0.85 (0.02)	0.84 (0.02)	0.84 (0.02)	0.0292071	0.381826	No
cg10581837	13	LMO7	0.31 (0.04)	0.3 (0.03)	0.32 (0.04)	0.0292326	0.381826	Yes
cg26901111	19	ZNF20	0.29 (0.06)	0.28 (0.05)	0.3 (0.04)	0.0292662	0.381826	Yes
cg18159646	11	SNORD22;SNORD31;SNORD30;SNHG1	0.56 (0.04)	0.56 (0.04)	0.55 (0.04)	0.0293148	0.381826	Yes
cg01802453	4	ODZ3	0.11 (0.02)	0.11 (0.02)	0.12 (0.02)	0.0293307	0.381826	Yes
cg12404590	22	TTLL8	0.69 (0.04)	0.68 (0.04)	0.67 (0.04)	0.0293321	0.381826	Yes
cg00340584	1		0.12 (0.03)	0.12 (0.03)	0.11 (0.03)	0.0293493	0.381826	Yes
cg15963463	1	RUNX3	0.35 (0.03)	0.36 (0.03)	0.34 (0.02)	0.0293746	0.381826	No
cg03051880	6	MAN1A1	0.74 (0.03)	0.74 (0.03)	0.75 (0.03)	0.0293927	0.381826	No
cg19783015	8		0.16 (0.01)	0.16 (0.01)	0.15 (0.01)	0.0293971	0.381826	Yes
cg25376651	13	EEF1DP3	0.33 (0.05)	0.31 (0.05)	0.31 (0.05)	0.0294123	0.381826	Yes
cg22107533	15	TRIM69	0.48 (0.04)	0.48 (0.04)	0.47 (0.04)	0.0294215	0.381826	No
cg11673244	22	MIR130B;MIR301B	0.39 (0.04)	0.39 (0.05)	0.37 (0.04)	0.0294411	0.381826	Yes
cg03539717	19	GADD45GIP1	0.59 (0.04)	0.58 (0.03)	0.58 (0.03)	0.0294483	0.381826	Yes
cg08021532	16	ADCY7	0.88 (0.03)	0.87 (0.04)	0.86 (0.03)	0.0295546	0.382501	Yes
cg05122453	9	SH2D3C	0.47 (0.03)	0.46 (0.03)	0.46 (0.02)	0.0295641	0.382501	Yes
cg06285727	11	ATG16L2	0.15 (0.03)	0.15 (0.03)	0.14 (0.03)	0.0296048	0.382527	Yes
cg27556952	6	C6orf136	0.88 (0.02)	0.87 (0.02)	0.88 (0.02)	0.0297672	0.384359	Yes
cg10381071	15	TLE3	0.15 (0.03)	0.15 (0.03)	0.14 (0.03)	0.0298208	0.384785	No
cg27198497	6		0.65 (0.04)	0.65 (0.04)	0.66 (0.04)	0.0298605	0.384792	Yes
cg17372101	7	CNTNAP2	0.5 (0.04)	0.5 (0.05)	0.52 (0.05)	0.0298626	0.384792	No
cg09021712	1	TTLL10	0.84 (0.02)	0.84 (0.02)	0.83 (0.02)	0.0299899	0.385649	Yes
cg08121652	1		0.69 (0.03)	0.68 (0.04)	0.67 (0.03)	0.029997	0.385649	Yes
cg18593727	3	HCLS1	0.92 (0.01)	0.92 (0.02)	0.93 (0.01)	0.0300087	0.385649	Yes
cg06710900	3	IQSEC1	0.11 (0.02)	0.11 (0.02)	0.12 (0.02)	0.0300117	0.385649	No
cg23205886	5	SNHG4;MATR3	0.54 (0.04)	0.53 (0.03)	0.52 (0.04)	0.0300515	0.385682	No
cg04259904	1	ARTN	0.34 (0.05)	0.33 (0.05)	0.33 (0.05)	0.0300568	0.385682	Yes
cg00391067	2	LOC100271715	0.79 (0.03)	0.79 (0.02)	0.8 (0.02)	0.0300981	0.385697	Yes
cg06803853	16	CASKIN1	0.97 (0.01)	0.97 (0.01)	0.97 (0.01)	0.0301612	0.385937	Yes
cg14902389	2	MGAT4A	0.88 (0.02)	0.88 (0.02)	0.88 (0.02)	0.0301893	0.385937	No
cg14752525	2		0.69 (0.04)	0.69 (0.04)	0.68 (0.04)	0.0301994	0.385937	Yes
cg14214321	12	DYNLL1	0.07 (0.02)	0.07 (0.02)	0.07 (0.02)	0.0302435	0.38609	Yes
cg10323921	12		0.39 (0.05)	0.39 (0.05)	0.41 (0.05)	0.0302528	0.38609	Yes
cg25197194	3	CCDC48	0.62 (0.05)	0.61 (0.05)	0.64 (0.05)	0.0302857	0.386192	No
cg26559804	11	ETS1	0.2 (0.03)	0.2 (0.03)	0.19 (0.02)	0.0303228	0.386192	No
cg04772644	6	RXRB	0.16 (0.02)	0.16 (0.02)	0.15 (0.02)	0.0304144	0.387094	No
cg07969646	1	IER5	0.53 (0.03)	0.52 (0.03)	0.52 (0.03)	0.030512	0.387966	Yes
cg22232504	12	SSPN	0.86 (0.02)	0.86 (0.02)	0.87 (0.02)	0.0305245	0.387966	Yes
cg15309910	20	CD93	0.54 (0.04)	0.54 (0.04)	0.55 (0.04)	0.0305562	0.388105	Yes
cg13740985	9	PSAT1	0.37 (0.06)	0.37 (0.06)	0.38 (0.06)	0.0306438	0.38869	Yes
cg19457763	11	ASAM	0.11 (0.03)	0.12 (0.02)	0.12 (0.03)	0.0306833	0.38878	Yes
cg03603530	16	PDF;COG8	0.17 (0.03)	0.17 (0.03)	0.16 (0.03)	0.0306926	0.38878	Yes
cg10346111	3	GHRLOS;C3orf42	0.91 (0.02)	0.91 (0.02)	0.9 (0.02)	0.030764	0.389157	Yes
cg00936935	10	SGMS1	0.8 (0.04)	0.8 (0.04)	0.79 (0.04)	0.0309306	0.390999	Yes
cg14537332	11	SHANK2	0.25 (0.09)	0.23 (0.08)	0.22 (0.07)	0.0309591	0.391017	Yes
cg04337403	2	TSSC1	0.76 (0.03)	0.76 (0.03)	0.77 (0.04)	0.030995	0.391017	No
cg27534624	12	MIR141;MIR200C	0.86 (0.03)	0.86 (0.03)	0.87 (0.02)	0.0310012	0.391017	Yes
cg21548340	11		0.73 (0.04)	0.72 (0.04)	0.72 (0.04)	0.0310158	0.391017	Yes
cg03682690	22	SYNGR1	0.82 (0.04)	0.81 (0.03)	0.81 (0.04)	0.0310468	0.391081	Yes
cg00291478	10	RGS10	0.71 (0.05)	0.71 (0.05)	0.7 (0.05)	0.0311395	0.391638	No
cg05253716	12	SLC15A4;MGC16384	0.92 (0.02)	0.92 (0.02)	0.92 (0.02)	0.0311526	0.391638	Yes
cg03534662	3	LIMD1	0.43 (0.04)	0.42 (0.03)	0.42 (0.03)	0.03118	0.391638	Yes
cg18795232	12	KDM2B	0.66 (0.04)	0.66 (0.03)	0.68 (0.03)	0.0311953	0.391638	No
cg07632771	7		0.75 (0.04)	0.75 (0.04)	0.74 (0.04)	0.0312119	0.391638	No
cg10373607	20	TSHZ2	0.91 (0.03)	0.9 (0.03)	0.9 (0.02)	0.0314149	0.393392	Yes
cg21912308	X	PRAF2	0.82 (0.05)	0.81 (0.05)	0.8 (0.04)	0.0314732	0.393857	Yes
cg00159523	10	TCF7L2	0.45 (0.11)	0.44 (0.13)	0.41 (0.09)	0.031502	0.393884	No
cg17163168	1	TP73	0.28 (0.06)	0.26 (0.06)	0.26 (0.06)	0.0315175	0.393884	Yes
cg07512814	19	LDLR	0.64 (0.07)	0.63 (0.06)	0.61 (0.06)	0.0315564	0.394107	No
cg07556599	6	RPS18	0.84 (0.03)	0.83 (0.03)	0.83 (0.03)	0.0316012	0.394115	No
cg17560136	8	EPB49	0.82 (0.03)	0.82 (0.03)	0.81 (0.03)	0.0316132	0.394115	No
cg05953373	16	CBFA2T3	0.7 (0.05)	0.69 (0.04)	0.71 (0.05)	0.0316263	0.394115	No
cg05496768	10	C10orf11	0.93 (0.01)	0.92 (0.01)	0.92 (0.01)	0.0316415	0.394115	Yes
cg26053832	16		0.27 (0.03)	0.26 (0.03)	0.26 (0.03)	0.0317007	0.394159	Yes
cg04220930	8		0.68 (0.05)	0.67 (0.06)	0.67 (0.05)	0.0317065	0.394159	Yes
cg12741639	22	CYTH4	0.31 (0.04)	0.31 (0.04)	0.3 (0.03)	0.0317084	0.394159	No
cg14889653	11	TOLLIP	0.78 (0.04)	0.78 (0.04)	0.8 (0.03)	0.0318981	0.395991	No
cg27375378	17		0.32 (0.04)	0.31 (0.04)	0.31 (0.04)	0.0319417	0.396061	Yes
cg26996569	12		0.39 (0.07)	0.4 (0.08)	0.42 (0.07)	0.0319655	0.396061	Yes
cg20379671	22		0.83 (0.04)	0.82 (0.04)	0.81 (0.04)	0.0319674	0.396061	Yes
cg21179618	9	NOTCH1	0.45 (0.04)	0.44 (0.04)	0.46 (0.03)	0.032038	0.396673	No
cg05272827	17	BAHCC1	0.39 (0.03)	0.38 (0.03)	0.38 (0.03)	0.0320636	0.396726	Yes
cg24851181	3	C3orf72	0.21 (0.03)	0.22 (0.03)	0.2 (0.03)	0.0321453	0.397473	Yes
cg12649208	17	ACSF2	0.75 (0.02)	0.75 (0.02)	0.76 (0.02)	0.0321676	0.397486	Yes
cg07229212	8	XKR6	0.57 (0.04)	0.57 (0.05)	0.55 (0.05)	0.0322016	0.397608	No
cg01519765	3	ETV5	0.2 (0.04)	0.2 (0.04)	0.21 (0.04)	0.0322522	0.397608	Yes
cg00510160	12		0.67 (0.03)	0.67 (0.03)	0.67 (0.03)	0.0322569	0.397608	Yes
cg06778853	1	PHF13	0.63 (0.03)	0.62 (0.04)	0.62 (0.04)	0.0322627	0.397608	Yes
cg02015582	6	HLA-DMA	0.88 (0.02)	0.88 (0.02)	0.88 (0.02)	0.0323336	0.397852	Yes
cg11617964	6	PRRT1	0.72 (0.05)	0.7 (0.06)	0.71 (0.05)	0.0323428	0.397852	No
cg15251319	3	C3orf21	0.73 (0.03)	0.73 (0.03)	0.74 (0.03)	0.0323481	0.397852	No
cg09238801	14	PNMA1	0.16 (0.02)	0.16 (0.03)	0.15 (0.02)	0.0323677	0.397852	Yes
cg11143671	1	KIAA1614	0.48 (0.04)	0.47 (0.04)	0.48 (0.04)	0.0324079	0.398084	Yes
cg11363234	8		0.75 (0.04)	0.74 (0.04)	0.73 (0.04)	0.0324397	0.398212	Yes
cg20454518	12	FBRSL1	0.38 (0.06)	0.37 (0.05)	0.39 (0.05)	0.0325676	0.39952	Yes
cg19442493	17	HRNBP3	0.58 (0.04)	0.58 (0.04)	0.57 (0.04)	0.0326146	0.399833	Yes
cg27539046	1		0.31 (0.06)	0.3 (0.07)	0.29 (0.08)	0.0326502	0.400008	Yes
cg08708961	1	PSEN2	0.3 (0.07)	0.3 (0.07)	0.33 (0.07)	0.0326803	0.400113	No
cg24842859	1	RUNX3	0.48 (0.03)	0.48 (0.03)	0.47 (0.03)	0.0327396	0.400285	No
cg12140977	8	ST3GAL1	0.53 (0.03)	0.53 (0.03)	0.52 (0.03)	0.0327453	0.400285	No
cg09869729	5	HK3	0.16 (0.03)	0.17 (0.03)	0.17 (0.03)	0.0327663	0.400285	No
cg00024404	5	SERINC5	0.13 (0.02)	0.13 (0.02)	0.13 (0.02)	0.03278	0.400285	No
cg21476599	12	ANO2	0.85 (0.04)	0.85 (0.03)	0.85 (0.04)	0.0328131	0.400427	Yes
cg25723614	10	KCNIP2	0.7 (0.02)	0.71 (0.02)	0.7 (0.02)	0.0328561	0.400689	Yes
cg14899065	15	IL16	0.36 (0.07)	0.35 (0.08)	0.35 (0.07)	0.0329135	0.401128	Yes
cg16399049	16	HS3ST2	0.16 (0.04)	0.15 (0.04)	0.16 (0.04)	0.0329915	0.401217	Yes
cg16410171	14	RNASE7	0.71 (0.04)	0.71 (0.04)	0.7 (0.03)	0.0330013	0.401217	Yes
cg24718367	1	MAD2L2	0.36 (0.03)	0.36 (0.03)	0.35 (0.03)	0.0330164	0.401217	Yes
cg13370427	22	ADSL	0.45 (0.03)	0.44 (0.03)	0.44 (0.03)	0.0330282	0.401217	No
cg07261940	17	ASPSCR1	0.94 (0.02)	0.93 (0.02)	0.94 (0.01)	0.0330744	0.401293	No
cg25376310	6	ZDHHC14	0.44 (0.03)	0.44 (0.03)	0.43 (0.03)	0.0330775	0.401293	Yes
cg04656424	16	FAM38A	0.41 (0.03)	0.4 (0.04)	0.41 (0.03)	0.0331017	0.401326	Yes
cg04174091	11		0.64 (0.05)	0.63 (0.06)	0.64 (0.06)	0.0331739	0.401537	Yes
cg04768713	19	ZNF701	0.19 (0.03)	0.19 (0.02)	0.2 (0.03)	0.0331892	0.401537	Yes
cg00378158	22	LARGE	0.83 (0.03)	0.83 (0.03)	0.82 (0.03)	0.0331951	0.401537	Yes
cg16516405	1		0.17 (0.04)	0.17 (0.04)	0.19 (0.04)	0.0332157	0.401537	Yes
cg09718582	2		0.71 (0.05)	0.7 (0.05)	0.7 (0.04)	0.0332266	0.401537	Yes
cg11619216	17	LOC100130933;RECQL5	0.68 (0.03)	0.67 (0.03)	0.67 (0.03)	0.0333687	0.402993	No
cg19071976	6	TNXB	0.73 (0.04)	0.72 (0.04)	0.71 (0.03)	0.0334184	0.403098	No
cg01682285	14	TSHR	0.55 (0.05)	0.54 (0.05)	0.54 (0.05)	0.0334266	0.403098	No
cg01605984	9	SNORD24;SNORD36B;MED22;RPL7A;SNORD36A	0.71 (0.04)	0.71 (0.03)	0.7 (0.03)	0.0334422	0.403098	Yes
cg07757252	3	TWF2	0.8 (0.02)	0.8 (0.02)	0.79 (0.02)	0.033567	0.404341	No
cg22036538	12	CD27;LOC678655	0.41 (0.07)	0.39 (0.07)	0.4 (0.08)	0.0336396	0.404669	Yes
cg21979773	17		0.74 (0.02)	0.74 (0.02)	0.74 (0.02)	0.0336454	0.404669	Yes
cg24550676	5	DND1;HARS	0.75 (0.03)	0.74 (0.03)	0.74 (0.03)	0.0336641	0.404669	No
cg23574443	17	LOC100128288	0.9 (0.02)	0.9 (0.02)	0.89 (0.02)	0.0337607	0.404669	No
cg22483030	6	HLA-DPB1	0.19 (0.04)	0.19 (0.04)	0.19 (0.04)	0.0337769	0.404669	Yes
cg01022780	3		0.27 (0.03)	0.27 (0.03)	0.28 (0.03)	0.0337933	0.404669	Yes
cg26573704	5	ADAMTS12	0.08 (0.03)	0.08 (0.02)	0.09 (0.03)	0.0338092	0.404669	No
cg14094639	1	AURKAIP1	0.89 (0.03)	0.89 (0.03)	0.88 (0.02)	0.0338514	0.404669	Yes
cg04806562	17	TEX19	0.49 (0.03)	0.49 (0.04)	0.51 (0.04)	0.0338669	0.404669	Yes
cg19120389	11		0.05 (0.01)	0.05 (0.01)	0.05 (0.01)	0.0338756	0.404669	Yes
cg06560379	6	NFKBIE	0.09 (0.02)	0.09 (0.02)	0.09 (0.02)	0.0338924	0.404669	No
cg18451588	7	PRR15	0.19 (0.06)	0.18 (0.06)	0.17 (0.05)	0.0339078	0.404669	No
cg19784428	19	NWD1	0.73 (0.05)	0.73 (0.05)	0.72 (0.05)	0.0339262	0.404669	Yes
cg03963219	2		0.18 (0.03)	0.18 (0.02)	0.19 (0.03)	0.0339301	0.404669	Yes
cg27146050	19	HIF3A	0.32 (0.04)	0.32 (0.04)	0.31 (0.03)	0.0339409	0.404669	Yes
cg06672696	3	SLMAP	0.82 (0.02)	0.81 (0.02)	0.81 (0.02)	0.034021	0.40509	Yes
cg01498832	17	RPTOR	0.49 (0.05)	0.5 (0.06)	0.49 (0.06)	0.0340414	0.40509	No
cg25256723	1	F5	0.68 (0.03)	0.67 (0.03)	0.67 (0.03)	0.0341113	0.405442	Yes
cg04987734	14	CDC42BPB	0.39 (0.04)	0.38 (0.04)	0.4 (0.04)	0.0341219	0.405442	Yes
cg24158160	1	C1orf230	0.35 (0.05)	0.34 (0.05)	0.36 (0.04)	0.0341361	0.405442	No
cg11014740	2		0.39 (0.02)	0.39 (0.03)	0.38 (0.02)	0.0342168	0.405876	No
cg20152539	17	HS3ST3B1;MGC12916	0.31 (0.05)	0.3 (0.05)	0.28 (0.05)	0.0342409	0.405876	Yes
cg05524458	5	ANKRD33B	0.83 (0.03)	0.82 (0.02)	0.82 (0.03)	0.0342596	0.405876	Yes
cg06159340	16	CTF1	0.59 (0.05)	0.58 (0.05)	0.57 (0.04)	0.034284	0.405907	Yes
cg23759710	2	OXER1	0.52 (0.03)	0.51 (0.03)	0.52 (0.03)	0.0343515	0.406449	Yes
cg16340767	14		0.48 (0.03)	0.48 (0.03)	0.47 (0.03)	0.0343927	0.406516	Yes
cg24148817	6	C6orf129	0.89 (0.03)	0.9 (0.03)	0.88 (0.03)	0.0344634	0.406516	Yes
cg00207731	15	FURIN	0.57 (0.04)	0.56 (0.04)	0.56 (0.04)	0.0344687	0.406516	No
cg14168269	9		0.9 (0.02)	0.9 (0.02)	0.9 (0.02)	0.0344869	0.406516	Yes
cg09172850	1		0.78 (0.03)	0.78 (0.03)	0.77 (0.04)	0.0345052	0.406516	Yes
cg22266072	11	ME3	0.8 (0.02)	0.79 (0.02)	0.79 (0.02)	0.0345445	0.406516	No
cg13003054	22	PATZ1	0.11 (0.02)	0.11 (0.01)	0.11 (0.01)	0.0345779	0.406516	No
cg04889069	8		0.6 (0.06)	0.59 (0.06)	0.62 (0.06)	0.0345998	0.406516	Yes
cg02470871	3	CD80	0.18 (0.03)	0.18 (0.03)	0.17 (0.03)	0.0346089	0.406516	Yes
cg10364905	3		0.75 (0.03)	0.75 (0.03)	0.74 (0.02)	0.03461	0.406516	Yes
cg10112407	2	AGAP1	0.11 (0.03)	0.11 (0.03)	0.12 (0.04)	0.0346145	0.406516	Yes
cg02605634	20	WFDC10A;WFDC9	0.15 (0.02)	0.15 (0.02)	0.16 (0.02)	0.0346348	0.406516	Yes
cg15237152	19	CNN1	0.19 (0.03)	0.19 (0.03)	0.2 (0.03)	0.0346402	0.406516	Yes
cg23090529	1		0.48 (0.07)	0.47 (0.07)	0.45 (0.07)	0.0347212	0.40721	No
cg02610360	11	TMEM136	0.58 (0.06)	0.58 (0.05)	0.6 (0.06)	0.0347908	0.407568	Yes
cg06635952	2	ANXA4	0.35 (0.05)	0.34 (0.05)	0.36 (0.04)	0.0347953	0.407568	No
cg03965496	1		0.5 (0.05)	0.49 (0.05)	0.48 (0.05)	0.0348638	0.407786	Yes
cg00863661	16	LMF1	0.93 (0.02)	0.93 (0.02)	0.92 (0.03)	0.0348794	0.407786	No
cg05500734	7		0.45 (0.04)	0.45 (0.03)	0.44 (0.04)	0.034958	0.407941	Yes
cg25453677	17		0.88 (0.03)	0.87 (0.03)	0.86 (0.03)	0.0349703	0.407941	Yes
cg22337438	19	NLRP12	0.29 (0.05)	0.28 (0.05)	0.3 (0.04)	0.0349725	0.407941	Yes
cg01506917	6	TRERF1	0.46 (0.04)	0.46 (0.04)	0.45 (0.04)	0.0349801	0.407941	No
cg03471436	1	SOX13	0.86 (0.02)	0.86 (0.02)	0.85 (0.02)	0.0350224	0.408179	Yes
cg19419291	5	ELL2	0.64 (0.06)	0.65 (0.06)	0.62 (0.07)	0.0351349	0.408649	Yes
cg19586143	18	FHOD3	0.23 (0.03)	0.23 (0.02)	0.24 (0.03)	0.0351491	0.408649	Yes
cg17189494	1	MAD2L2	0.33 (0.03)	0.34 (0.03)	0.32 (0.03)	0.0351557	0.408649	Yes
cg17619755	6	VARS	0.62 (0.04)	0.62 (0.04)	0.63 (0.03)	0.035235	0.408649	No
cg26905258	13	MYCBP2	0.27 (0.03)	0.27 (0.02)	0.26 (0.02)	0.0352515	0.408649	No
cg03152870	18	ATP9B	0.85 (0.05)	0.85 (0.05)	0.86 (0.04)	0.0352668	0.408649	Yes
cg00947319	17	UBE2Z	0.73 (0.02)	0.73 (0.02)	0.73 (0.02)	0.0352858	0.408649	Yes
cg26880708	11		0.44 (0.07)	0.45 (0.06)	0.42 (0.07)	0.0353191	0.408649	Yes
cg09471709	10	ST8SIA6	0.85 (0.02)	0.85 (0.02)	0.85 (0.02)	0.0353201	0.408649	No
cg26536813	4	NMU	0.09 (0.01)	0.09 (0.01)	0.1 (0.01)	0.0353432	0.408649	Yes
cg07682160	19	UPF1	0.67 (0.05)	0.68 (0.04)	0.67 (0.04)	0.0353592	0.408649	No
cg25287268	13	DLEU2	0.41 (0.06)	0.4 (0.06)	0.4 (0.06)	0.0353748	0.408649	Yes
cg05668853	17	RAB34	0.69 (0.03)	0.69 (0.04)	0.67 (0.03)	0.0354083	0.408649	Yes
cg16151960	5	PHF15	0.73 (0.03)	0.73 (0.03)	0.72 (0.03)	0.0354215	0.408649	No
cg00968616	17	CUEDC1	0.53 (0.04)	0.53 (0.04)	0.54 (0.05)	0.0354677	0.408776	Yes
cg03348792	12	KRT1	0.31 (0.03)	0.32 (0.03)	0.33 (0.03)	0.0355239	0.408785	Yes
cg13869484	1	SLC2A5	0.65 (0.06)	0.65 (0.06)	0.63 (0.07)	0.0355248	0.408785	Yes
cg22031614	15	ISL2	0.13 (0.03)	0.13 (0.03)	0.12 (0.02)	0.0355341	0.408785	Yes
cg10370262	7	PRKAG2	0.64 (0.03)	0.63 (0.03)	0.63 (0.03)	0.0355986	0.409011	Yes
cg00246969	13	STK24	0.9 (0.03)	0.89 (0.03)	0.89 (0.03)	0.0356195	0.409011	No
cg04843111	1	BCAN	0.6 (0.03)	0.6 (0.04)	0.59 (0.03)	0.035699	0.409631	Yes
cg09554443	1	CD247	0.4 (0.04)	0.39 (0.04)	0.41 (0.04)	0.0357174	0.409631	Yes
cg02616604	10	SYT15	0.51 (0.04)	0.51 (0.04)	0.51 (0.03)	0.0357551	0.409644	Yes
cg09904616	7		0.86 (0.02)	0.86 (0.02)	0.86 (0.02)	0.0357624	0.409644	Yes
cg04630982	X	MIR505	0.33 (0.05)	0.34 (0.06)	0.36 (0.07)	0.0358217	0.409937	Yes
cg17588293	1	ZBTB7B	0.11 (0.01)	0.11 (0.01)	0.11 (0.01)	0.0358405	0.409937	Yes
cg10825315	14	TSHR	0.44 (0.06)	0.44 (0.06)	0.46 (0.06)	0.0358798	0.409937	No
cg18685455	6	AHI1	0.66 (0.06)	0.65 (0.06)	0.64 (0.06)	0.0359351	0.409937	Yes
cg26650480	20	RASSF2	0.73 (0.03)	0.72 (0.03)	0.72 (0.03)	0.0359845	0.409937	Yes
cg15667493	5	ANKRD55	0.87 (0.03)	0.87 (0.02)	0.88 (0.03)	0.0360641	0.409937	No
cg07764473	X	BCOR	0.73 (0.04)	0.73 (0.04)	0.74 (0.03)	0.0360847	0.409937	Yes
cg06885459	13	MCF2L	0.59 (0.05)	0.59 (0.05)	0.61 (0.05)	0.0360873	0.409937	No
cg09871637	1	LMO4	0.39 (0.05)	0.38 (0.04)	0.38 (0.05)	0.0361265	0.409937	Yes
cg05593667	6		0.24 (0.03)	0.24 (0.04)	0.23 (0.03)	0.0361468	0.409937	Yes
cg12864721	10	C10orf41	0.25 (0.05)	0.24 (0.05)	0.24 (0.05)	0.0361491	0.409937	Yes
cg22933449	11		0.85 (0.02)	0.84 (0.02)	0.85 (0.02)	0.0361788	0.409937	Yes
cg16871449	12		0.78 (0.03)	0.78 (0.03)	0.79 (0.02)	0.0361832	0.409937	Yes
cg10501360	10	ARHGAP22	0.73 (0.04)	0.74 (0.04)	0.72 (0.03)	0.036237	0.410298	No
cg07377446	19		0.83 (0.03)	0.83 (0.03)	0.83 (0.02)	0.0363753	0.411511	Yes
cg00857851	5	LPCAT1	0.83 (0.02)	0.83 (0.02)	0.82 (0.02)	0.0363887	0.411511	No
cg19906672	4	TBC1D14	0.75 (0.04)	0.75 (0.04)	0.74 (0.04)	0.0364103	0.411511	No
cg19638749	2		0.24 (0.06)	0.23 (0.06)	0.22 (0.05)	0.0364441	0.411644	Yes
cg26547816	5	ARHGAP26	0.63 (0.06)	0.62 (0.06)	0.61 (0.06)	0.036523	0.412285	Yes
cg21227253	14	FLRT2	0.54 (0.03)	0.53 (0.03)	0.54 (0.03)	0.0366114	0.412805	Yes
cg04225551	8	GRHL2	0.74 (0.03)	0.74 (0.03)	0.73 (0.03)	0.0366579	0.41306	Yes
cg10841124	5	AHRR	0.84 (0.03)	0.85 (0.03)	0.85 (0.03)	0.0366906	0.413178	No
cg04755523	6	BAT1	0.81 (0.03)	0.81 (0.03)	0.79 (0.03)	0.0367368	0.413449	No
cg02316506	3	ZBTB47	0.43 (0.04)	0.44 (0.04)	0.43 (0.03)	0.0367683	0.413555	Yes
cg04872610	1	AP4B1;DCLRE1B	0.3 (0.03)	0.29 (0.03)	0.28 (0.03)	0.0367978	0.413637	Yes
cg07529392	12	FIGNL2	0.71 (0.03)	0.71 (0.03)	0.71 (0.03)	0.0368656	0.414077	No
cg05191175	5		0.12 (0.02)	0.12 (0.02)	0.13 (0.02)	0.0369101	0.414077	Yes
cg00716579	19	MIR181C;MIR181D	0.73 (0.05)	0.73 (0.05)	0.72 (0.04)	0.0369169	0.414077	Yes
cg16103712	8	MATN2	0.25 (0.04)	0.25 (0.04)	0.26 (0.04)	0.0369257	0.414077	Yes
cg12858014	15	PDCD7	0.2 (0.05)	0.2 (0.04)	0.18 (0.04)	0.0369879	0.414527	Yes
cg22478317	2		0.72 (0.04)	0.72 (0.04)	0.71 (0.04)	0.0370496	0.414968	Yes
cg16963852	3	SIAH2	0.36 (0.05)	0.35 (0.05)	0.35 (0.05)	0.0372308	0.416128	Yes
cg09795027	17	EVPL	0.47 (0.04)	0.47 (0.04)	0.48 (0.04)	0.0372475	0.416128	Yes
cg08384239	2	TANC1	0.42 (0.03)	0.42 (0.03)	0.43 (0.03)	0.0372578	0.416128	Yes
cg06635946	22		0.66 (0.04)	0.65 (0.04)	0.65 (0.04)	0.0372604	0.416128	Yes
cg03434029	1	TCTEX1D4;BTBD19	0.25 (0.03)	0.26 (0.03)	0.24 (0.03)	0.0372646	0.416128	Yes
cg10791260	9	TNFSF15	0.07 (0.01)	0.07 (0.02)	0.06 (0.01)	0.0372869	0.416129	Yes
cg04982781	22	RPL3;RNU86	0.72 (0.05)	0.72 (0.04)	0.71 (0.04)	0.0373591	0.416545	No
cg25097946	10	SORBS1	0.91 (0.02)	0.91 (0.02)	0.92 (0.02)	0.0373688	0.416545	No
cg23247191	11	TPCN2	0.65 (0.04)	0.64 (0.03)	0.65 (0.03)	0.0374726	0.417204	Yes
cg06294803	3	EIF4G1	0.18 (0.03)	0.17 (0.03)	0.17 (0.03)	0.0375952	0.41832	No
cg04576021	6	HLA-DOB	0.87 (0.02)	0.87 (0.02)	0.87 (0.02)	0.0376577	0.418568	Yes
cg15428620	10	SFXN3	0.38 (0.03)	0.37 (0.03)	0.37 (0.03)	0.0376672	0.418568	Yes
cg01887374	2	HS6ST1	0.75 (0.06)	0.75 (0.06)	0.73 (0.06)	0.0376848	0.418568	Yes
cg19635644	13	UBAC2;MIR623	0.84 (0.03)	0.84 (0.03)	0.83 (0.03)	0.0377381	0.418811	Yes
cg06296597	10	LARP4B	0.8 (0.03)	0.79 (0.02)	0.8 (0.03)	0.0377844	0.418811	No
cg17935233	1	RHBG	0.39 (0.02)	0.39 (0.02)	0.39 (0.02)	0.0377908	0.418811	Yes
cg26542660	4	CEP135	0.17 (0.03)	0.17 (0.03)	0.16 (0.02)	0.0378015	0.418811	Yes
cg21091547	6	CDKN1A	0.75 (0.04)	0.74 (0.04)	0.74 (0.04)	0.0378413	0.418811	No
cg07112604	14	CCDC88C	0.52 (0.03)	0.52 (0.04)	0.51 (0.03)	0.0378929	0.419085	No
cg27543230	5	PPP2CA	0.12 (0.02)	0.12 (0.02)	0.12 (0.02)	0.0379232	0.419085	No
cg06715352	16	CMTM4	0.69 (0.04)	0.68 (0.04)	0.7 (0.04)	0.0379334	0.419085	Yes
cg02595219	11	KCNE3	0.25 (0.04)	0.24 (0.04)	0.25 (0.03)	0.037965	0.419186	Yes
cg07676859	20	SSTR4	0.29 (0.08)	0.27 (0.08)	0.3 (0.07)	0.0380489	0.419448	Yes
cg14725719	10	RET	0.91 (0.02)	0.91 (0.02)	0.91 (0.02)	0.0380947	0.419448	Yes
cg10634619	1	KIAA0495	0.3 (0.05)	0.29 (0.05)	0.29 (0.05)	0.038098	0.419448	Yes
cg17344906	19	NFIX	0.55 (0.05)	0.54 (0.05)	0.53 (0.04)	0.038101	0.419448	Yes
cg05379350	17	GIT1	0.25 (0.04)	0.24 (0.03)	0.23 (0.04)	0.0381848	0.420123	Yes
cg02531924	5	LPCAT1	0.66 (0.04)	0.66 (0.04)	0.65 (0.04)	0.0382776	0.420131	No
cg24433016	6	TTK	0.54 (0.05)	0.53 (0.05)	0.55 (0.04)	0.0382924	0.420131	Yes
cg27513586	15	SNORD115-48;HBII-52-46	0.37 (0.09)	0.36 (0.08)	0.39 (0.09)	0.0383027	0.420131	Yes
cg05044291	1	LGR6	0.28 (0.09)	0.3 (0.1)	0.29 (0.1)	0.0383179	0.420131	Yes
cg04859826	1		0.34 (0.03)	0.34 (0.03)	0.33 (0.03)	0.0383206	0.420131	Yes
cg17518710	11	ZBTB16	0.28 (0.06)	0.28 (0.06)	0.3 (0.06)	0.038472	0.421296	No
cg05057515	16	CBFA2T3	0.18 (0.03)	0.17 (0.03)	0.18 (0.03)	0.038509	0.421454	No
cg12177944	3	PLXND1	0.85 (0.02)	0.85 (0.02)	0.85 (0.02)	0.0385392	0.421538	Yes
cg06189394	3	LRIG1	0.27 (0.04)	0.26 (0.03)	0.25 (0.03)	0.0386174	0.421679	No
cg01566526	3	ALDH1L1	0.08 (0.03)	0.07 (0.03)	0.08 (0.03)	0.0386198	0.421679	No
cg17274064	21	ERG	0.24 (0.05)	0.24 (0.04)	0.22 (0.04)	0.0386699	0.421903	Yes
cg12452298	15		0.25 (0.06)	0.24 (0.06)	0.25 (0.05)	0.0387149	0.421903	Yes
cg24715680	2	BARD1	0.44 (0.05)	0.43 (0.06)	0.45 (0.05)	0.0387199	0.421903	No
cg09033219	17		0.91 (0.02)	0.91 (0.01)	0.91 (0.02)	0.0387399	0.421903	Yes
cg03958308	8	PLEC1	0.75 (0.04)	0.75 (0.04)	0.74 (0.03)	0.0387533	0.421903	No
cg26893816	5	AMACR	0.7 (0.05)	0.69 (0.05)	0.68 (0.06)	0.0388789	0.423024	Yes
cg02424715	14	JDP2	0.77 (0.03)	0.76 (0.03)	0.76 (0.03)	0.038987	0.423765	No
cg02481950	16	METTL9;IGSF6	0.76 (0.03)	0.76 (0.03)	0.77 (0.02)	0.0389925	0.423765	Yes
cg05131526	15	MAN2A2	0.63 (0.04)	0.62 (0.04)	0.62 (0.03)	0.0390239	0.42386	Yes
cg17523868	17	SEZ6	0.27 (0.03)	0.27 (0.03)	0.28 (0.04)	0.0390872	0.424169	Yes
cg19847577	15	APBA2	0.32 (0.04)	0.32 (0.04)	0.33 (0.04)	0.0390978	0.424169	No
cg15501231	6	C6orf27	0.37 (0.03)	0.37 (0.03)	0.37 (0.02)	0.0391675	0.42451	No
cg09494176	4	HTT	0.84 (0.03)	0.84 (0.03)	0.85 (0.03)	0.0391747	0.42451	No
cg21692620	17	CNTNAP1	0.35 (0.05)	0.35 (0.05)	0.37 (0.05)	0.0392433	0.425007	Yes
cg23878875	17	XYLT2	0.78 (0.03)	0.77 (0.03)	0.78 (0.03)	0.0393205	0.425596	No
cg27286011	14	INF2	0.64 (0.04)	0.63 (0.04)	0.65 (0.04)	0.0393696	0.425668	No
cg01810186	8		0.63 (0.05)	0.63 (0.05)	0.61 (0.05)	0.0393955	0.425668	Yes
cg10607675	X	KLHL34	0.48 (0.03)	0.49 (0.03)	0.49 (0.03)	0.0394693	0.426218	Yes
cg03139435	20	AURKA;CSTF1	0.28 (0.05)	0.27 (0.05)	0.26 (0.06)	0.0395101	0.426413	Yes
cg26812615	12	MAP1LC3B2	0.77 (0.03)	0.77 (0.03)	0.76 (0.03)	0.0395635	0.426481	Yes
cg02816727	10		0.85 (0.01)	0.85 (0.01)	0.85 (0.02)	0.0396074	0.426481	Yes
cg08267489	6	C6orf176;LOC441177	0.09 (0.01)	0.09 (0.01)	0.09 (0.01)	0.0396192	0.426481	Yes
cg20727233	7	ASNS	0.12 (0.02)	0.12 (0.01)	0.11 (0.01)	0.0396301	0.426481	No
cg06373240	19	PLEKHF1	0.34 (0.04)	0.33 (0.04)	0.32 (0.04)	0.0396535	0.426481	Yes
cg08900404	7	PRR15	0.15 (0.04)	0.14 (0.04)	0.14 (0.04)	0.0397128	0.426872	No
cg04424621	6	HIST1H2BJ	0.15 (0.04)	0.15 (0.03)	0.14 (0.03)	0.0397568	0.427099	Yes
cg09073799	15	MEX3B	0.66 (0.06)	0.65 (0.06)	0.65 (0.06)	0.0398083	0.427172	Yes
cg12712184	7		0.86 (0.03)	0.86 (0.03)	0.85 (0.03)	0.0398589	0.427172	Yes
cg08805054	11	BCL9L	0.7 (0.04)	0.7 (0.04)	0.69 (0.04)	0.0398784	0.427172	Yes
cg12149911	8	CA8	0.18 (0.03)	0.18 (0.03)	0.19 (0.03)	0.0398823	0.427172	Yes
cg26399164	11	CCND1	0.19 (0.02)	0.18 (0.02)	0.18 (0.02)	0.0399159	0.427172	Yes
cg10018519	2		0.2 (0.03)	0.2 (0.03)	0.19 (0.02)	0.0399563	0.427172	Yes
cg20778199	6		0.76 (0.05)	0.76 (0.05)	0.75 (0.05)	0.0399811	0.427172	Yes
cg15754084	12	PEX5	0.68 (0.04)	0.67 (0.04)	0.67 (0.04)	0.0400046	0.427172	Yes
cg19731612	5	NSD1	0.75 (0.07)	0.74 (0.07)	0.72 (0.07)	0.0400142	0.427172	No
cg13869942	1	THEM4	0.32 (0.05)	0.32 (0.05)	0.31 (0.04)	0.0400625	0.427289	No
cg20015689	20	SEMG1	0.69 (0.05)	0.7 (0.05)	0.71 (0.04)	0.0400909	0.427289	Yes
cg27169073	12		0.64 (0.05)	0.64 (0.05)	0.62 (0.06)	0.0401095	0.427289	Yes
cg05303057	17		0.1 (0.03)	0.1 (0.02)	0.11 (0.03)	0.0401331	0.427289	Yes
cg00872726	14		0.17 (0.05)	0.16 (0.04)	0.17 (0.05)	0.040178	0.427289	Yes
cg14550518	3	ZNF385D	0.08 (0.04)	0.08 (0.03)	0.07 (0.03)	0.0401863	0.427289	No
cg17476951	8	TRAPPC9	0.62 (0.05)	0.61 (0.05)	0.62 (0.05)	0.0402436	0.42734	Yes
cg09820519	1	C1orf230	0.12 (0.02)	0.12 (0.02)	0.13 (0.02)	0.0402598	0.42734	No
cg13702357	7	HIP1	0.58 (0.04)	0.57 (0.04)	0.57 (0.04)	0.0403135	0.427666	Yes
cg08420923	16	ANKRD11	0.82 (0.02)	0.82 (0.02)	0.83 (0.02)	0.0405231	0.429646	No
cg19721787	1	IQCC;CCDC28B	0.88 (0.02)	0.88 (0.02)	0.88 (0.02)	0.0405519	0.429707	Yes
cg18091264	15	SNORD18A;RPL4;SNORD18B;SNORD16	0.5 (0.04)	0.5 (0.04)	0.5 (0.03)	0.0406064	0.429777	No
cg13672342	2	CIAO1;TMEM127	0.47 (0.04)	0.46 (0.04)	0.45 (0.04)	0.0406307	0.429777	Yes
cg00496272	16	CENPT;THAP11	0.15 (0.02)	0.14 (0.02)	0.14 (0.02)	0.0406506	0.429777	No
cg23629561	11	KRTAP5-7	0.54 (0.02)	0.54 (0.02)	0.55 (0.02)	0.0406919	0.42997	Yes
cg22033586	2	GPD2	0.43 (0.07)	0.43 (0.07)	0.44 (0.06)	0.0407237	0.430063	No
cg22783327	19	FXYD1;FXYD7	0.38 (0.04)	0.37 (0.04)	0.38 (0.04)	0.0408229	0.430783	Yes
cg20518446	11	AHNAK	0.63 (0.06)	0.62 (0.07)	0.61 (0.07)	0.0408603	0.430783	Yes
cg17551891	7	MAD1L1	0.77 (0.04)	0.77 (0.04)	0.76 (0.03)	0.0408611	0.430783	No
cg07756788	13		0.83 (0.03)	0.83 (0.03)	0.82 (0.03)	0.0409268	0.431148	No
cg15372603	7	HOXA7	0.25 (0.04)	0.24 (0.03)	0.23 (0.04)	0.0409682	0.431148	No
cg08014182	6	RPS18	0.8 (0.05)	0.79 (0.05)	0.79 (0.04)	0.040972	0.431148	No
cg17033391	5	HDAC3;RELL2	0.88 (0.02)	0.88 (0.02)	0.88 (0.02)	0.040988	0.431148	Yes
cg24544082	2	SPTBN1	0.83 (0.02)	0.82 (0.02)	0.82 (0.03)	0.0410149	0.431159	Yes
cg12616487	11	ROM1;EML3	0.59 (0.03)	0.59 (0.03)	0.58 (0.04)	0.0410442	0.431159	No
cg05796261	3	PTPN23	0.76 (0.03)	0.75 (0.03)	0.75 (0.02)	0.0411207	0.431159	Yes
cg27664530	10	PIK3AP1	0.11 (0.03)	0.11 (0.03)	0.12 (0.03)	0.0411601	0.431159	Yes
cg10401088	12	LUM	0.82 (0.04)	0.81 (0.04)	0.8 (0.04)	0.0411855	0.431159	Yes
cg14173968	6		0.24 (0.05)	0.25 (0.05)	0.27 (0.05)	0.0412025	0.431159	Yes
cg05424060	7	GNAI1	0.79 (0.03)	0.79 (0.03)	0.78 (0.03)	0.0412361	0.431159	Yes
cg06613263	5	NR3C1	0.89 (0.02)	0.89 (0.02)	0.89 (0.03)	0.041261	0.431159	Yes
cg22838079	8		0.85 (0.02)	0.85 (0.02)	0.84 (0.02)	0.0412662	0.431159	Yes
cg01713950	1	RCC2	0.74 (0.04)	0.74 (0.04)	0.73 (0.03)	0.0414304	0.43239	Yes
cg20364632	6		0.23 (0.03)	0.23 (0.02)	0.22 (0.03)	0.0415004	0.432879	Yes
cg11010122	4	DNAJB14	0.06 (0.02)	0.06 (0.02)	0.05 (0.01)	0.0415467	0.432956	Yes
cg00119117	20	INSM1	0.08 (0.01)	0.08 (0.01)	0.09 (0.01)	0.0415541	0.432956	Yes
cg23659289	17	ARHGAP27	0.53 (0.04)	0.53 (0.04)	0.54 (0.03)	0.0415928	0.433117	No
cg04038246	11	EHD1	0.88 (0.03)	0.88 (0.03)	0.88 (0.03)	0.0416564	0.433538	No
cg15986413	2	ECEL1	0.16 (0.02)	0.16 (0.02)	0.17 (0.02)	0.0417293	0.433684	Yes
cg12490835	10		0.54 (0.04)	0.53 (0.04)	0.53 (0.04)	0.0417515	0.433684	Yes
cg01240931	5	APC	0.39 (0.03)	0.39 (0.03)	0.38 (0.03)	0.0417614	0.433684	Yes
cg26161997	4		0.64 (0.04)	0.63 (0.04)	0.64 (0.04)	0.0417744	0.433684	Yes
cg02010738	19	C19orf36;MOBKL2A	0.38 (0.06)	0.37 (0.06)	0.35 (0.06)	0.04184	0.433684	No
cg19816811	7	HOXA6	0.55 (0.07)	0.54 (0.07)	0.52 (0.07)	0.041862	0.433684	No
cg15577373	2		0.18 (0.04)	0.18 (0.04)	0.19 (0.03)	0.0418802	0.433684	Yes
cg20149625	11	KLC2	0.19 (0.02)	0.19 (0.02)	0.18 (0.02)	0.0418918	0.433684	Yes
cg23820933	1	ITGA10	0.19 (0.03)	0.19 (0.04)	0.2 (0.03)	0.0419048	0.433684	Yes
cg11229399	1		0.11 (0.02)	0.11 (0.02)	0.11 (0.03)	0.0419681	0.433684	Yes
cg07847863	13	PCDH8	0.11 (0.04)	0.1 (0.04)	0.12 (0.04)	0.0419724	0.433684	Yes
cg14113931	18	CEP76;PSMG2	0.79 (0.03)	0.79 (0.03)	0.79 (0.03)	0.0420271	0.433793	Yes
cg06704122	2	EN1	0.09 (0.04)	0.08 (0.03)	0.09 (0.03)	0.0420868	0.434082	Yes
cg09640571	16		0.68 (0.03)	0.68 (0.03)	0.68 (0.03)	0.0421039	0.434082	Yes
cg23551720	17	HOXB3	0.89 (0.02)	0.89 (0.02)	0.89 (0.02)	0.0421423	0.434238	Yes
cg19089201	7	MYO1G	0.82 (0.05)	0.82 (0.05)	0.83 (0.05)	0.0423346	0.435854	No
cg22332066	1	HHAT	0.9 (0.02)	0.9 (0.02)	0.91 (0.01)	0.0423459	0.435854	Yes
cg09611599	11		0.61 (0.09)	0.61 (0.08)	0.65 (0.09)	0.0423782	0.435947	Yes
cg26767593	8	DCTN6	0.88 (0.02)	0.87 (0.02)	0.87 (0.02)	0.0424909	0.436334	Yes
cg26614073	3	SCAP	0.5 (0.04)	0.5 (0.05)	0.49 (0.04)	0.0425115	0.436334	Yes
cg22496559	3	TM4SF19	0.89 (0.03)	0.9 (0.03)	0.9 (0.03)	0.0425202	0.436334	No
cg18028767	11	TSPAN4	0.15 (0.02)	0.15 (0.02)	0.15 (0.02)	0.0425217	0.436334	Yes
cg23762517	1	HIVEP3	0.53 (0.09)	0.51 (0.09)	0.55 (0.08)	0.0425349	0.436334	No
cg10334489	17	KSR1	0.65 (0.04)	0.65 (0.04)	0.65 (0.04)	0.0425561	0.436334	No
cg02158978	12	FBRSL1	0.34 (0.03)	0.34 (0.03)	0.35 (0.03)	0.0426166	0.436715	Yes
cg24209126	7	IMMP2L	0.58 (0.03)	0.58 (0.03)	0.59 (0.03)	0.0427611	0.436903	No
cg02840199	16	ADCY9	0.54 (0.05)	0.53 (0.05)	0.52 (0.05)	0.042784	0.436903	No
cg22791932	16	ZFPM1	0.73 (0.02)	0.73 (0.03)	0.74 (0.02)	0.0428108	0.436903	Yes
cg04258133	11	TNNT3	0.82 (0.03)	0.82 (0.03)	0.83 (0.02)	0.0428339	0.436903	No
cg17471102	19	FUT3	0.56 (0.03)	0.56 (0.03)	0.57 (0.02)	0.0428369	0.436903	Yes
cg22695729	5		0.22 (0.04)	0.22 (0.04)	0.23 (0.04)	0.0428606	0.436903	Yes
cg26545040	19	WDR18	0.68 (0.03)	0.67 (0.03)	0.67 (0.03)	0.0428908	0.436903	Yes
cg09588020	1	WASF2	0.53 (0.05)	0.53 (0.05)	0.52 (0.04)	0.0428958	0.436903	Yes
cg02768162	12	TMEM119	0.61 (0.03)	0.6 (0.03)	0.6 (0.03)	0.0429574	0.436903	Yes
cg10609310	8		0.68 (0.04)	0.68 (0.04)	0.67 (0.03)	0.0429597	0.436903	Yes
cg10973881	1	TMOD4	0.16 (0.04)	0.16 (0.04)	0.17 (0.04)	0.0429872	0.436903	Yes
cg17804348	1	TP73	0.47 (0.05)	0.47 (0.05)	0.45 (0.06)	0.0430754	0.436903	Yes
cg25821249	17		0.87 (0.03)	0.87 (0.03)	0.86 (0.03)	0.0430871	0.436903	Yes
cg16624521	5		0.65 (0.04)	0.66 (0.04)	0.67 (0.03)	0.0431223	0.436903	Yes
cg20832320	3	APEH	0.81 (0.03)	0.81 (0.03)	0.8 (0.03)	0.0431307	0.436903	Yes
cg11489251	6	BAT1	0.34 (0.04)	0.33 (0.04)	0.33 (0.04)	0.043137	0.436903	No
cg08726900	16	ANKRD11	0.26 (0.05)	0.25 (0.05)	0.26 (0.05)	0.0431498	0.436903	No
cg09700701	11	GAL3ST3	0.17 (0.03)	0.17 (0.03)	0.18 (0.03)	0.0432053	0.437216	Yes
cg03384915	19	SIN3B	0.87 (0.03)	0.87 (0.03)	0.86 (0.02)	0.0432275	0.437216	No
cg01017608	13		0.23 (0.04)	0.22 (0.05)	0.22 (0.05)	0.0432803	0.437434	Yes
cg26669717	7	PRKAR1B	0.58 (0.03)	0.58 (0.03)	0.57 (0.03)	0.0432959	0.437434	No
cg15014975	1	RUNX3	0.85 (0.05)	0.84 (0.05)	0.83 (0.04)	0.0433402	0.437434	No
cg05035315	11	OPCML	0.72 (0.04)	0.73 (0.04)	0.72 (0.04)	0.0433428	0.437434	Yes
cg01005506	10	ADO	0.32 (0.04)	0.32 (0.04)	0.31 (0.03)	0.0434292	0.437776	No
cg04761746	4	SCOC	0.6 (0.04)	0.6 (0.03)	0.59 (0.04)	0.043447	0.437776	Yes
cg08123207	6	PRRT1	0.61 (0.04)	0.61 (0.05)	0.61 (0.03)	0.0435322	0.438398	No
cg06644515	1	SNORD47;GAS5;SNORD81;SNORD80;SNORD78;SNORD79	0.57 (0.04)	0.57 (0.04)	0.56 (0.04)	0.0436388	0.438704	No
cg00152340	8	GPIHBP1	0.87 (0.03)	0.87 (0.03)	0.86 (0.03)	0.0436679	0.438704	Yes
cg11046638	17	PDE6G	0.78 (0.04)	0.78 (0.04)	0.77 (0.04)	0.0437139	0.438704	Yes
cg19917989	6		0.68 (0.04)	0.66 (0.04)	0.68 (0.05)	0.0437326	0.438704	Yes
cg10554624	1	ECHDC2	0.68 (0.03)	0.68 (0.03)	0.67 (0.03)	0.0437348	0.438704	Yes
cg14016875	17	HS3ST3B1;MGC12916	0.43 (0.05)	0.43 (0.05)	0.41 (0.04)	0.0437462	0.438704	Yes
cg04158698	1		0.7 (0.04)	0.69 (0.04)	0.71 (0.03)	0.0437906	0.438704	Yes
cg01949002	1	SKI	0.81 (0.03)	0.8 (0.02)	0.8 (0.02)	0.0438184	0.438704	No
cg03853945	13		0.69 (0.04)	0.68 (0.04)	0.68 (0.04)	0.0438332	0.438704	Yes
cg04324758	19	KLF2	0.08 (0.01)	0.07 (0.01)	0.07 (0.01)	0.0438445	0.438704	Yes
cg13074055	14		0.72 (0.08)	0.72 (0.08)	0.68 (0.07)	0.0439076	0.438963	Yes
cg17904575	14	PPP2R5C	0.71 (0.05)	0.71 (0.05)	0.71 (0.05)	0.0439175	0.438963	Yes
cg15107641	3	CDCP1	0.17 (0.03)	0.17 (0.03)	0.18 (0.03)	0.0439897	0.439215	Yes
cg15471946	21	BRWD1	0.09 (0.02)	0.09 (0.02)	0.08 (0.02)	0.044022	0.439303	Yes
cg16474684	4	RNF4	0.13 (0.03)	0.12 (0.04)	0.12 (0.03)	0.0441438	0.439465	Yes
cg13808012	1		0.65 (0.04)	0.64 (0.04)	0.63 (0.04)	0.0441477	0.439465	Yes
cg27586885	19		0.91 (0.02)	0.91 (0.02)	0.91 (0.02)	0.0441497	0.439465	Yes
cg09023136	1	MOSC1	0.14 (0.02)	0.14 (0.02)	0.15 (0.02)	0.0441714	0.439465	Yes
cg01663407	2	AFTPH	0.94 (0.01)	0.94 (0.01)	0.93 (0.01)	0.0442039	0.439465	Yes
cg11405655	1		0.19 (0.03)	0.2 (0.03)	0.18 (0.03)	0.0442156	0.439465	No
cg05895711	8		0.66 (0.03)	0.66 (0.03)	0.65 (0.03)	0.0442514	0.439465	Yes
cg17668731	5	CCNJL	0.26 (0.04)	0.26 (0.04)	0.27 (0.03)	0.0442989	0.439465	No
cg03826252	7	WDR86	0.62 (0.04)	0.61 (0.03)	0.61 (0.04)	0.0443054	0.439465	Yes
cg18404811	17		0.34 (0.05)	0.34 (0.05)	0.34 (0.04)	0.0443185	0.439465	Yes
cg00812761	4	SCFD2	0.5 (0.03)	0.5 (0.03)	0.51 (0.03)	0.0443207	0.439465	Yes
cg24576425	2	GALNT5	0.24 (0.04)	0.23 (0.04)	0.24 (0.04)	0.0444402	0.439965	No
cg10255761	3	KLHDC8B	0.75 (0.04)	0.75 (0.04)	0.74 (0.04)	0.0444419	0.439965	Yes
cg04209460	17	PLD2	0.4 (0.03)	0.39 (0.03)	0.39 (0.04)	0.0445703	0.44083	Yes
cg16541026	3	P4HTM	0.39 (0.04)	0.4 (0.04)	0.38 (0.04)	0.0445915	0.44083	No
cg24582007	6		0.7 (0.04)	0.69 (0.04)	0.71 (0.04)	0.0446001	0.44083	Yes
cg19913118	1	POLR3GL;ANKRD34A	0.58 (0.04)	0.57 (0.04)	0.58 (0.03)	0.0448226	0.442281	Yes
cg02708705	17	FAM100B	0.13 (0.03)	0.14 (0.03)	0.12 (0.03)	0.044824	0.442281	Yes
cg26276120	12	TPI1	0.2 (0.04)	0.2 (0.03)	0.19 (0.04)	0.0448504	0.442281	No
cg12686847	6	HSPA1L	0.86 (0.02)	0.86 (0.02)	0.85 (0.02)	0.0448653	0.442281	Yes
cg23018755	17	MAFG	0.52 (0.06)	0.51 (0.06)	0.52 (0.05)	0.0449402	0.442757	No
cg14896134	10		0.43 (0.03)	0.43 (0.03)	0.42 (0.04)	0.044961	0.442757	Yes
cg23079808	12	LTBR	0.36 (0.08)	0.36 (0.08)	0.38 (0.07)	0.0450302	0.443204	Yes
cg00981350	16	MVD;CYBA	0.84 (0.02)	0.83 (0.02)	0.83 (0.03)	0.0451081	0.443738	No
cg19566658	7	TRIP6	0.66 (0.04)	0.66 (0.04)	0.65 (0.03)	0.0451624	0.444038	No
cg05055821	7		0.14 (0.03)	0.14 (0.03)	0.15 (0.03)	0.0452517	0.444512	Yes
cg24704287	19		0.33 (0.04)	0.33 (0.04)	0.32 (0.04)	0.0453351	0.444512	Yes
cg08916374	1	POLR3GL;ANKRD34A	0.5 (0.04)	0.5 (0.04)	0.5 (0.04)	0.0453505	0.444512	Yes
cg12461871	3	C3orf79	0.94 (0.03)	0.95 (0.03)	0.94 (0.03)	0.0453518	0.444512	Yes
cg24484352	17		0.25 (0.03)	0.24 (0.03)	0.25 (0.03)	0.0453557	0.444512	Yes
cg24475171	9	C9orf78;USP20	0.1 (0.03)	0.1 (0.03)	0.09 (0.02)	0.0453558	0.444512	Yes
cg04970434	17	GP1BA	0.71 (0.04)	0.7 (0.04)	0.71 (0.04)	0.0453773	0.444512	No
cg12393668	17	CCDC43	0.55 (0.05)	0.54 (0.05)	0.55 (0.04)	0.0454102	0.444601	Yes
cg18625627	14	TSHR	0.26 (0.04)	0.26 (0.05)	0.27 (0.05)	0.0455471	0.445708	No
cg00626312	3		0.78 (0.02)	0.78 (0.02)	0.78 (0.02)	0.045596	0.445865	Yes
cg00923634	1	MAN1C1	0.61 (0.05)	0.61 (0.05)	0.6 (0.05)	0.0456109	0.445865	No
cg01939428	7	UBE3C	0.31 (0.08)	0.31 (0.08)	0.28 (0.07)	0.0457439	0.446784	Yes
cg25358853	3	CCRL2	0.11 (0.02)	0.11 (0.02)	0.11 (0.02)	0.045765	0.446784	Yes
cg03999941	5		0.69 (0.05)	0.69 (0.05)	0.68 (0.05)	0.0457768	0.446784	No
cg02106682	7	HOXA5	0.65 (0.05)	0.64 (0.05)	0.63 (0.05)	0.0458117	0.446891	Yes
cg12573289	7	CCM2	0.46 (0.03)	0.46 (0.03)	0.45 (0.03)	0.0458542	0.447072	Yes
cg11198596	3	LRIG1	0.37 (0.05)	0.37 (0.05)	0.35 (0.05)	0.0460408	0.448523	No
cg15347627	4	C4orf10;NOP14	0.81 (0.02)	0.81 (0.03)	0.8 (0.02)	0.0460646	0.448523	Yes
cg05858130	X	PRAF2	0.82 (0.03)	0.82 (0.03)	0.81 (0.03)	0.046075	0.448523	Yes
cg01758512	6	FUT9	0.17 (0.05)	0.16 (0.05)	0.17 (0.05)	0.046277	0.450145	Yes
cg22032366	6	HMGN3	0.89 (0.02)	0.89 (0.02)	0.89 (0.02)	0.0463118	0.450145	No
cg19709355	17	RARA	0.13 (0.02)	0.12 (0.02)	0.12 (0.02)	0.046314	0.450145	No
cg20294304	6	HMGA1	0.1 (0.04)	0.09 (0.03)	0.09 (0.03)	0.0463823	0.450574	No
cg16646054	5	C5orf62	0.51 (0.05)	0.5 (0.05)	0.49 (0.05)	0.0464771	0.451094	No
cg11599721	6	RPS6KA2	0.82 (0.03)	0.82 (0.03)	0.81 (0.02)	0.0465063	0.451094	No
cg05374956	19	FUT6	0.31 (0.06)	0.31 (0.06)	0.32 (0.05)	0.0465549	0.451312	Yes
cg04218548	1	CAMTA1	0.79 (0.02)	0.78 (0.02)	0.79 (0.02)	0.0466222	0.451511	Yes
cg04086928	9	RAPGEF1	0.76 (0.03)	0.75 (0.03)	0.75 (0.03)	0.0466442	0.451511	No
cg06803614	1	NT5C1A	0.84 (0.02)	0.84 (0.03)	0.84 (0.02)	0.046648	0.451511	Yes
cg01756424	3		0.36 (0.03)	0.36 (0.03)	0.37 (0.03)	0.0467838	0.452071	Yes
cg15028458	3	C3orf67	0.65 (0.05)	0.65 (0.05)	0.64 (0.05)	0.0468289	0.452071	Yes
cg20272648	8	GPR124	0.73 (0.03)	0.73 (0.02)	0.72 (0.03)	0.04683	0.452071	Yes
cg21963854	15	MIR548H4	0.31 (0.04)	0.3 (0.04)	0.31 (0.04)	0.0468547	0.452071	No
cg14623715	6	PDE7B	0.69 (0.05)	0.68 (0.05)	0.68 (0.05)	0.0468575	0.452071	Yes
cg02402368	8	ANGPT2;MCPH1	0.68 (0.05)	0.67 (0.05)	0.66 (0.06)	0.0468638	0.452071	Yes
cg12411858	22	MED15	0.8 (0.02)	0.8 (0.02)	0.79 (0.02)	0.0469163	0.452071	No
cg13394182	8	TOP1MT	0.61 (0.04)	0.61 (0.04)	0.62 (0.03)	0.0469238	0.452071	Yes
cg07199524	15	CRTC3	0.05 (0.02)	0.05 (0.02)	0.05 (0.02)	0.0469824	0.452402	Yes
cg12974394	1	ADAMTSL4	0.59 (0.04)	0.58 (0.03)	0.58 (0.04)	0.04705	0.452714	No
cg11067786	2	LOXL3;DOK1	0.9 (0.02)	0.91 (0.02)	0.9 (0.02)	0.0470694	0.452714	No
cg00218893	17		0.51 (0.03)	0.51 (0.03)	0.5 (0.02)	0.0471071	0.452714	Yes
cg12600843	6	TRIM26	0.77 (0.04)	0.77 (0.04)	0.76 (0.04)	0.0471119	0.452714	No
cg19711268	14	TRAF3	0.4 (0.09)	0.4 (0.08)	0.43 (0.08)	0.0471646	0.452714	Yes
cg15100535	2		0.58 (0.02)	0.58 (0.02)	0.59 (0.02)	0.0471921	0.452714	Yes
cg09716613	13	N4BP2L1	0.23 (0.03)	0.22 (0.04)	0.23 (0.03)	0.047203	0.452714	Yes
cg19464252	16	FBRS	0.8 (0.04)	0.8 (0.04)	0.79 (0.04)	0.0472087	0.452714	Yes
cg06687489	15	MYO5C	0.22 (0.03)	0.22 (0.03)	0.23 (0.03)	0.0472479	0.452857	Yes
cg00066351	7		0.71 (0.04)	0.71 (0.03)	0.72 (0.04)	0.0472786	0.452918	Yes
cg11858213	3	CRTAP	0.61 (0.05)	0.61 (0.05)	0.62 (0.05)	0.047307	0.452959	No
cg03884592	1	HIVEP3	0.31 (0.07)	0.3 (0.07)	0.33 (0.07)	0.0474045	0.453659	No
cg24911837	7	CCT6P1	0.61 (0.04)	0.61 (0.04)	0.6 (0.04)	0.047433	0.4537	Yes
cg15965301	17		0.84 (0.04)	0.83 (0.04)	0.83 (0.04)	0.0474872	0.453713	Yes
cg01328473	2	PXDN	0.55 (0.05)	0.54 (0.05)	0.54 (0.05)	0.0475157	0.453713	Yes
cg26425321	8		0.14 (0.03)	0.14 (0.03)	0.15 (0.03)	0.0475356	0.453713	Yes
cg07577824	20	SNX5;SNORD17	0.39 (0.03)	0.38 (0.04)	0.38 (0.03)	0.0475388	0.453713	No
cg24247537	11	PTDSS2	0.22 (0.05)	0.21 (0.05)	0.23 (0.05)	0.047581	0.453713	Yes
cg22740603	6	SYNGAP1	0.58 (0.03)	0.58 (0.03)	0.57 (0.03)	0.0476011	0.453713	No
cg03188000	12		0.31 (0.06)	0.32 (0.06)	0.33 (0.06)	0.0476809	0.453969	Yes
cg15736127	2	GPD2	0.48 (0.06)	0.48 (0.07)	0.49 (0.05)	0.0477098	0.453969	No
cg17933224	19		0.85 (0.03)	0.85 (0.02)	0.84 (0.03)	0.0477444	0.453969	Yes
cg27589594	17	SLC5A10	0.54 (0.04)	0.54 (0.04)	0.53 (0.04)	0.0477913	0.453969	Yes
cg01228685	8	PLEC1	0.81 (0.02)	0.81 (0.02)	0.81 (0.02)	0.0478122	0.453969	No
cg21201109	19	KANK2	0.76 (0.03)	0.76 (0.03)	0.75 (0.03)	0.0478269	0.453969	No
cg10184431	6	HIST1H2AJ;HIST1H2BM	0.35 (0.04)	0.35 (0.04)	0.34 (0.04)	0.0478376	0.453969	Yes
cg24709951	17		0.37 (0.05)	0.38 (0.06)	0.39 (0.05)	0.0478502	0.453969	Yes
cg02112621	3		0.52 (0.05)	0.51 (0.05)	0.51 (0.04)	0.0478824	0.453995	Yes
cg14007559	14		0.88 (0.03)	0.88 (0.03)	0.87 (0.03)	0.0479283	0.453995	Yes
cg01715384	1		0.38 (0.03)	0.38 (0.03)	0.39 (0.03)	0.0479587	0.453995	Yes
cg27509105	2		0.77 (0.02)	0.77 (0.03)	0.77 (0.03)	0.0479822	0.453995	Yes
cg25593631	1		0.7 (0.03)	0.69 (0.03)	0.69 (0.03)	0.0479895	0.453995	Yes
cg05008975	11	SCN4B	0.72 (0.03)	0.72 (0.02)	0.72 (0.03)	0.0480092	0.453995	Yes
cg21473545	5	AACSL	0.65 (0.04)	0.64 (0.04)	0.65 (0.04)	0.0480232	0.453995	Yes
cg02660643	16	ZCCHC14	0.81 (0.03)	0.81 (0.03)	0.8 (0.03)	0.0480619	0.454131	No
cg07549715	20	GNRH2	0.59 (0.04)	0.59 (0.04)	0.6 (0.04)	0.0481131	0.454386	Yes
cg24203758	17	SH3D20	0.91 (0.02)	0.9 (0.02)	0.9 (0.02)	0.0482388	0.455342	Yes
cg12840502	22	CABP7	0.09 (0.02)	0.09 (0.02)	0.1 (0.03)	0.0483211	0.455658	No
cg23999801	10	LHPP	0.75 (0.02)	0.75 (0.03)	0.75 (0.02)	0.0483556	0.455753	No
cg08941639	16	HSDL1	0.19 (0.03)	0.19 (0.03)	0.2 (0.04)	0.0483931	0.455876	Yes
cg05429448	3	LOC152225	0.28 (0.07)	0.28 (0.07)	0.29 (0.05)	0.0485131	0.456041	Yes
cg23361275	8	MFHAS1	0.62 (0.06)	0.61 (0.06)	0.59 (0.06)	0.0485905	0.456041	No
cg16681526	1	TNFRSF25;PLEKHG5	0.52 (0.04)	0.52 (0.05)	0.5 (0.04)	0.0485928	0.456041	No
cg02744588	19	CCDC114	0.67 (0.03)	0.66 (0.03)	0.67 (0.02)	0.0486072	0.456041	Yes
cg01177100	3	SRGAP3	0.44 (0.03)	0.43 (0.03)	0.44 (0.04)	0.0486137	0.456041	Yes
cg12699156	17	SHBG;FXR2	0.38 (0.03)	0.37 (0.03)	0.37 (0.03)	0.0486754	0.456041	Yes
cg05525649	6	PBX2	0.63 (0.04)	0.62 (0.04)	0.61 (0.03)	0.0486807	0.456041	No
cg16545743	5	IL3	0.77 (0.03)	0.77 (0.03)	0.78 (0.03)	0.0487319	0.456041	No
cg27405731	7	CUX1	0.47 (0.06)	0.47 (0.06)	0.48 (0.06)	0.0487511	0.456041	No
cg22117188	3		0.68 (0.03)	0.69 (0.03)	0.68 (0.03)	0.048761	0.456041	Yes
cg13522882	2	MAP4K4	0.77 (0.04)	0.76 (0.04)	0.77 (0.05)	0.0487668	0.456041	No
cg11535839	2		0.55 (0.05)	0.54 (0.04)	0.56 (0.05)	0.0487777	0.456041	Yes
cg20742389	19	GIPC1	0.12 (0.03)	0.12 (0.03)	0.11 (0.03)	0.0487812	0.456041	Yes
cg08442823	11	PHF21A	0.46 (0.05)	0.45 (0.05)	0.47 (0.05)	0.0487974	0.456041	Yes
cg03821384	16	ZDHHC1	0.65 (0.03)	0.64 (0.03)	0.64 (0.03)	0.0488046	0.456041	Yes
cg13038618	14		0.58 (0.04)	0.57 (0.05)	0.57 (0.04)	0.0488082	0.456041	No
cg10576725	14	MMP14	0.09 (0.03)	0.09 (0.02)	0.08 (0.02)	0.0488258	0.456041	Yes
cg26517831	7	GNA12	0.83 (0.04)	0.83 (0.05)	0.81 (0.04)	0.0488813	0.456234	No
cg11856308	1	ATAD3A	0.36 (0.03)	0.35 (0.04)	0.36 (0.03)	0.0489198	0.456234	Yes
cg20925383	13		0.96 (0.01)	0.96 (0.01)	0.96 (0.01)	0.0490003	0.456529	Yes
cg10665488	11	SLC25A22	0.11 (0.02)	0.12 (0.02)	0.11 (0.02)	0.0490462	0.456551	Yes
cg01309569	1	NPHP4	0.65 (0.04)	0.65 (0.05)	0.65 (0.05)	0.049081	0.456551	No
cg26601073	17	TLCD2	0.25 (0.05)	0.24 (0.05)	0.25 (0.04)	0.049102	0.456551	Yes
cg20249566	19	NWD1	0.72 (0.05)	0.72 (0.05)	0.71 (0.05)	0.0491148	0.456551	Yes
cg08606254	5	AHRR	0.93 (0.02)	0.93 (0.02)	0.94 (0.01)	0.0491306	0.456551	No
cg19266329	1		0.66 (0.03)	0.65 (0.03)	0.66 (0.04)	0.0491649	0.456551	Yes
cg02949838	16		0.86 (0.02)	0.86 (0.02)	0.86 (0.02)	0.0491738	0.456551	Yes
cg05969150	16	ZFHX3	0.38 (0.03)	0.38 (0.03)	0.39 (0.03)	0.0492291	0.45676	No
cg08540958	17	CCL2	0.21 (0.02)	0.21 (0.02)	0.21 (0.02)	0.0492646	0.45676	Yes
cg21859290	11	CDK2AP2	0.71 (0.03)	0.71 (0.03)	0.7 (0.03)	0.0493241	0.45676	Yes
cg27344791	19	ZNF433	0.41 (0.07)	0.41 (0.07)	0.39 (0.06)	0.0494266	0.45676	Yes
cg16718162	1	MDS2	0.11 (0.02)	0.11 (0.02)	0.11 (0.02)	0.0494283	0.45676	Yes
cg24446586	7	HOXA11AS;HOXA11	0.07 (0.03)	0.07 (0.03)	0.08 (0.03)	0.0494691	0.45676	Yes
cg11556164	7	LRRN3;IMMP2L	0.82 (0.03)	0.82 (0.03)	0.81 (0.03)	0.0494809	0.45676	No
cg11748187	10	TCF7L2	0.57 (0.07)	0.56 (0.08)	0.54 (0.06)	0.0495459	0.45676	No
cg08371951	6	SYNGAP1	0.68 (0.07)	0.67 (0.07)	0.66 (0.06)	0.0495674	0.45676	No
cg00308665	13	HTR2A	0.68 (0.05)	0.67 (0.05)	0.69 (0.04)	0.0495736	0.45676	Yes
cg04600297	19		0.74 (0.04)	0.74 (0.04)	0.75 (0.03)	0.0495784	0.45676	Yes
cg13803234	14	RAD51L1	0.56 (0.04)	0.56 (0.04)	0.55 (0.03)	0.0496	0.45676	No
cg25748521	7	HIPK2	0.81 (0.03)	0.81 (0.03)	0.8 (0.03)	0.0496504	0.45676	Yes
cg24429974	1	TOMM40L	0.71 (0.03)	0.7 (0.03)	0.71 (0.02)	0.0496602	0.45676	Yes
cg17334970	6	VPS52	0.77 (0.02)	0.77 (0.02)	0.77 (0.02)	0.0496612	0.45676	No
cg20495009	12	SLC41A2	0.83 (0.02)	0.83 (0.02)	0.82 (0.03)	0.0496914	0.456814	Yes
cg03126058	1	PRDM16	0.78 (0.04)	0.78 (0.04)	0.77 (0.05)	0.0497671	0.457072	No
cg21241823	21	PRDM15	0.24 (0.03)	0.24 (0.03)	0.23 (0.03)	0.0497838	0.457072	Yes
cg13659700	7	LMTK2	0.88 (0.02)	0.87 (0.02)	0.87 (0.02)	0.049793	0.457072	Yes
cg04144218	7	AUTS2	0.86 (0.02)	0.86 (0.02)	0.86 (0.02)	0.049838	0.457261	No
cg12593793	1		0.32 (0.04)	0.31 (0.04)	0.3 (0.03)	0.0499136	0.457504	Yes
cg17863912	2	HOXD8	0.13 (0.03)	0.13 (0.03)	0.14 (0.03)	0.0499428	0.457548	Yes
cg22843712	8	MYOM2	0.16 (0.04)	0.15 (0.04)	0.16 (0.05)	0.0499896	0.457575	Yes
